# Supplementary material for: Electrochemical phosphorothiolation and 1,4-S → C phospho-Fries rearrangement: controlled access to phosphorothiolated and mercapto-phosphono substituted indolizines
Source: Royal Society of Chemistry journal article supplement (doi:10.1039/d3qo01042b), 2023-01-01
Supplement: d3qo01042b1.pdf [file d3qo01042b1.pdf]

Supporting Information for

**Electrochemical Phosphorothiolation and 1,4-S→C Phospho-Fries Rearrangement:  
Controlled Access to Phosphorothiolated and Mercapto-Phosphono Substituted  
Indolizines**

Xiang Liu, Wenxuan Jiang, Changfeng Huang, Shaohong Ma, Qiong Wang, Hua Cao\*

*School of Chemistry and Chemical Engineering, Guangdong Provincial Key Laboratory of Advanced Drug  
Delivery, and Guangdong Provincial Engineering Center of Topical Precise Drug Delivery System, Guangdong  
Pharmaceutical University, Zhongshan 528458, P. R. of China*

E-mail: caohua@gdpu.edu.cn

**Table of Contents:**

---

|                                                      |      |
|------------------------------------------------------|------|
| 1. General considerations                            | S-2  |
| 2. Experimental procedures and characterization data | S-3  |
| 2.1 <i>Experimental procedures</i>                   | S-3  |
| 2.2 <i>Characterization data</i>                     | S-5  |
| 3. NMR spectra for new compounds                     | S-19 |
| 4. References                                        | S-74 |

---

## 1. General considerations

Unless otherwise noted, commercial reagents were purchased from Adamas, Alfa, Aladdin, TCI, *J&K* or Macklin and used without further purification. All reactions were carried out using oven-dried glassware and all reactions proceeded without special care. Column chromatography was performed on 200-300 mesh silica gel (Huanghai, China).

$^1\text{H}$ ,  $^{31}\text{P}$  and  $^{13}\text{C}\{^1\text{H}\}$  NMR spectra were recorded on an Bruker Ascend 400 MHz spectrometer at ambient temperature.  $^1\text{H}$  NMR spectra are referred to the TMS signal ( $\delta = 0$  ppm) and  $^{13}\text{C}$  NMR spectra are referred to the residual solvent signal ( $\delta = 77.16$  ppm). Data for  $^1\text{H}$  NMR are reported as follows: chemical shifts ( $\delta$  ppm), multiplicities (s = singlet, d = doublet, t = triplet, q = quartet, m = multiplet, br = broad), coupling constants (Hz), integration.

The instrument for electrolysis is ElectraSyn 2.0 Package (IKA), the anode electrode is vitreous carbon plate (52 mm $\times$ 8 mm $\times$ 2 mm) and cathodic electrode was platinum plate (52 mm $\times$ 8 mm $\times$ 2 mm); And MS-3610DS (MAISHENG), carbon plate (10 mm $\times$ 10 mm $\times$ 3 mm) and cathodic electrode was platinum plate (10 mm $\times$ 10 mm $\times$ 0.1 mm). The data of HRMS was carried out on Agilent 7250 GC/QTOF.

## 2. Experimental procedures and characterization data

### 2.1 Experimental procedures

Synthesis of compounds **1** according to the following procedure<sup>1</sup>:

As exemplified for **1a**:

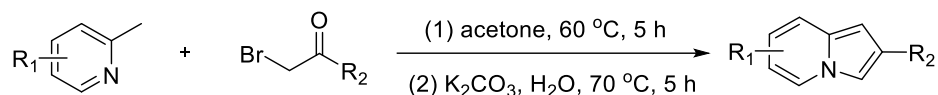

A solution of 2-picoline (0.93 g, 10 mmol, 1.0 equiv) and 2-bromoacetophenone (1.99 g, 10 mmol, 1.0 equiv) in acetone (50 mL) were added to a 100 mL round bottom flask and heated with a heating mantle for 5 hours to 60 °C. The precipitate obtained by filtration separation was redissolved in 20 mL of hot water (60 °C). Then, K<sub>2</sub>CO<sub>3</sub> (2.76 g, 20 mmol, 2.0 equiv) was added and heated at 60 °C for 5 hours. After filtration and drying in vacuo, a white solid compound **1a** was obtained without further purification.

#### 2-Phenylindolizine (**1a**)

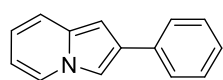

<sup>1</sup>H NMR (400 MHz, CDCl<sub>3</sub>) δ 7.89 (d, *J* = 7.0 Hz, 1H), 7.67 (d, *J* = 7.2 Hz, 2H), 7.58 (s, 1H), 7.40 (t, *J* = 7.7 Hz, 2H), 7.35 (d, *J* = 9.0 Hz, 1H), 7.29-7.23 (m, 1H), 6.70 (s, 1H), 6.68-6.60 (m, 1H), 6.45 (t, *J* = 6.5 Hz, 1H). <sup>13</sup>C NMR (100 MHz, CDCl<sub>3</sub>) δ 135.3, 133.6, 129.4, 128.7, 126.5, 126.2, 125.0, 119.0, 117.3, 110.5, 109.2, 96.6.

Indolizine derivatives **1** were known compounds and synthesized according to the known procedures, and their NMR data were in agreement with those described in the literature.<sup>1,2</sup>

Synthesis of products **3** according to the following procedure:

As exemplified for **3a**:

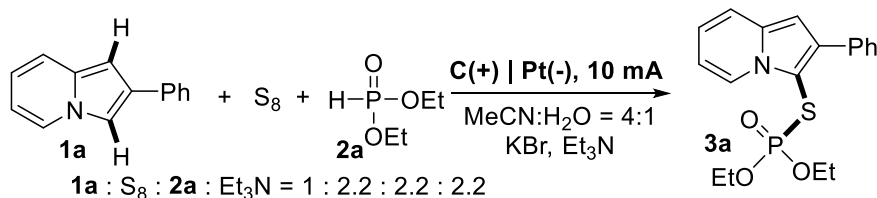

2-Phenylindolizine (0.3 mmol, 1.0 equiv), S<sub>8</sub> (0.66 mmol, 2.2 equiv), diethyl phosphonate (0.66 mmol, 2.2 equiv), KBr (1.2 mmol), Et<sub>3</sub>N (0.66 mmol), CH<sub>3</sub>CN (4 mL) and H<sub>2</sub>O (1 mL) were placed in a 10 mL undivided electrolytic cell with a vitreous carbon plate anode (52 mm×8 mm×2 mm) and a platinum plate cathode (52 mm×8 mm×2 mm). The electrolysis was carried out at room temperature under a constant current of 10 mA for 10 hours. Then, the resulting solution was quenched with 10 mL brine and extracted

with ethyl acetate (3×10 mL). The extract was dried with Na<sub>2</sub>SO<sub>4</sub>. The solvent was removed with a rotary evaporator. The pure product **3a** was obtained by preparative TLC on silica gel (petroleum ether: ethyl acetate = 3: 1).

### Synthesis of products **4** according to the following procedure:

As exemplified for **4a**:

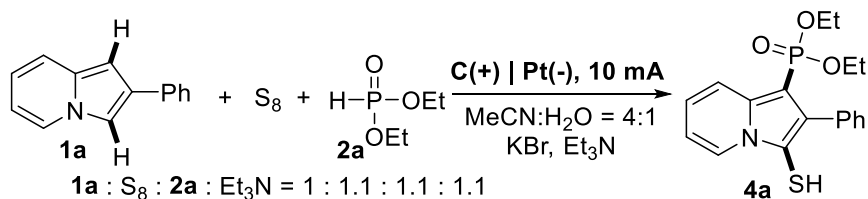

2-Phenylindolizine (0.3 mmol, 1.0 equiv), S<sub>8</sub> (0.33 mmol, 1.1 equiv), diethyl phosphonate (0.33 mmol, 1.1 equiv), KBr (1.2 mmol), Et<sub>3</sub>N (0.33 mmol), CH<sub>3</sub>CN (4 mL) and H<sub>2</sub>O (1 mL) were placed in a 10 mL undivided electrolytic cell with a vitreous carbon plate anode (52 mm×8 mm×2 mm) and a platinum plate cathode (52 mm×8 mm×2 mm). The electrolysis was carried out at room temperature under a constant current of 10 mA for 10 hours. Then, the resulting solution was quenched with 10 mL brine and extracted with ethyl acetate (3×10 mL). The extract was dried with Na<sub>2</sub>SO<sub>4</sub>. The solvent was removed with a rotary evaporator. The pure product **4a** was obtained by preparative TLC on silica gel (petroleum ether: ethyl acetate = 3: 1).

### Synthesis of products **5** according to the following procedure:

As exemplified for **5a**:

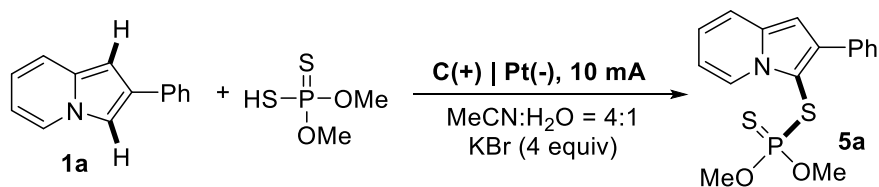

2-Phenylindolizine (0.3 mmol, 1.0 equiv), (EtO)<sub>2</sub>P(S)SH (0.33 mmol, 1.1 equiv), KBr (1.2 mmol), CH<sub>3</sub>CN (4 mL) and H<sub>2</sub>O (1 mL) were placed in a 10 mL undivided electrolytic cell with a vitreous carbon plate anode (52 mm×8 mm×2 mm) and a platinum plate cathode (52 mm×8 mm×2 mm). The electrolysis was carried out at room temperature under a constant current of 10 mA for 10 hours. Then, the resulting solution was quenched with 10 mL brine and extracted with ethyl acetate (3×10 mL). The extract was dried with Na<sub>2</sub>SO<sub>4</sub>.



The solvent was removed with a rotary evaporator. The pure product **5a** was obtained by preparative TLC on silica gel (petroleum ether: ethyl acetate = 3: 1).

## 2.2 Characterization data

### O,O-Diethyl S-(2-phenylindolizin-3-yl) phosphorothioate (**3a**)

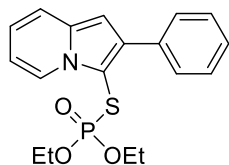

Preparative TLC on silica gel (eluent: PE/EA = 3/1, v/v) to afford **3a**. Yellow liquid (84.5 mg, 78%). <sup>1</sup>H NMR (400 MHz, CDCl<sub>3</sub>) δ 8.52 (d, *J* = 7.1 Hz, 1H), 7.77 (d, *J* = 7.1 Hz, 2H), 7.44 (t, *J* = 7.6 Hz, 2H), 7.40 (d, *J* = 8.9 Hz, 1H), 7.33 (t, *J* = 7.4 Hz, 1H), 6.86 (t, *J* = 7.7 Hz, 1H), 6.69 (t, *J* = 8.6 Hz, 2H), 3.84 (q, *J* = 8.0 Hz, 2H), 3.69 (q, *J* = 8.3 Hz, 2H), 0.99 (t, *J* = 7.1 Hz, 6H). <sup>13</sup>C NMR (101 MHz, CDCl<sub>3</sub>) δ 136.8 (d, *J* = 4.8 Hz), 136.2 (d, *J* = 3.0 Hz), 135.2 (d, *J* = 1.9 Hz), 129.4, 128.4, 127.2, 124.7, 119.8 (d, *J* = 2.6 Hz), 118.7 (d, *J* = 2.9 Hz), 111.0 (d, *J* = 1.5 Hz), 100.8 (d, *J* = 1.9 Hz), 97.9 (d, *J* = 8.4 Hz), 64.3 (d, *J* = 7.0 Hz), 15.9 (d, *J* = 7.1 Hz). <sup>31</sup>P NMR (162 MHz, CDCl<sub>3</sub>) δ 19.85 – 19.65 (m). HRMS (GC/QTOF) *m/z*: [M]<sup>+</sup> calcd for C<sub>18</sub>H<sub>20</sub>NO<sub>3</sub>PS, 361.0902; found 361.0902.

### O,O-Diethyl S-(8-methyl-2-phenylindolizin-3-yl) phosphorothioate (**3b**)

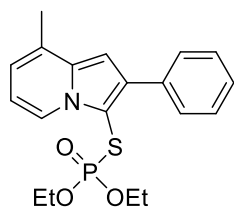

Preparative TLC on silica gel (eluent: PE/EA = 3/1, v/v) to afford **3b**. Green liquid (81.0 mg, 72%). <sup>1</sup>H NMR (400 MHz, CDCl<sub>3</sub>) δ 8.41 (d, *J* = 6.8 Hz, 1H), 7.79 (d, *J* = 7.5 Hz, 2H), 7.45 (t, *J* = 7.6 Hz, 2H), 7.33 (t, *J* = 7.4 Hz, 1H), 6.66 (q, *J* = 6.5 Hz, 3H), 3.84 (q, *J* = 8.0 Hz, 2H), 3.69 (q, *J* = 8.3 Hz, 2H), 2.44 (s, 3H), 1.00 (t, *J* = 7.0 Hz, 6H). <sup>13</sup>C NMR (101 MHz, CDCl<sub>3</sub>) δ 137.0 (d, *J* = 3.0 Hz), 136.4 (d, *J* = 4.8 Hz), 135.4 (d, *J* = 1.9 Hz), 129.4, 128.4, 127.8 (d, *J* = 2.8 Hz), 127.2, 122.6, 119.2 (d, *J* = 2.6 Hz), 111.2 (d, *J* = 1.4 Hz), 99.4 (d, *J* = 1.9 Hz), 98.4 (d, *J* = 8.2 Hz), 64.2 (d, *J* = 6.9 Hz), 17.9, 15.9 (d, *J* = 7.2 Hz). <sup>31</sup>P NMR (162 MHz, CDCl<sub>3</sub>) δ 19.80 – 20.0 (m). HRMS (GC/QTOF) *m/z*: [M]<sup>+</sup> calcd for C<sub>19</sub>H<sub>22</sub>NO<sub>3</sub>PS, 375.1058; found 375.1057.

### S-(8-Bromo-2-phenylindolizin-3-yl) O,O-diethyl phosphorothioate (**3c**)

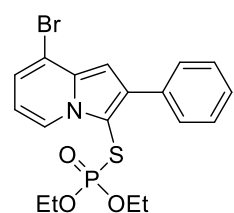

Preparative TLC on silica gel (eluent: PE/EA = 3/1, v/v) to afford **3c**. Yellow liquid (81.7 mg, 62%). <sup>1</sup>H NMR (400 MHz, CDCl<sub>3</sub>) δ 8.50 (d, *J* = 7.0 Hz, 1H), 7.77 (d, *J* = 7.6 Hz, 2H), 7.45 (t, *J* = 7.5 Hz, 2H), 7.35 (t, *J* = 7.4 Hz, 1H), 7.10 (d, *J* = 7.0 Hz, 1H), 6.85 (s, 1H), 6.58 (t, *J* = 7.1 Hz, 1H), 3.85 (q, *J* = 8.0 Hz, 2H), 3.70 (q, *J* = 8.6, 8.2 Hz, 2H), 1.01 (t, *J* = 7.0 Hz, 6H). <sup>13</sup>C NMR (101 MHz, CDCl<sub>3</sub>) δ 137.3 (d, *J* = 4.9 Hz), 135.0 (d, *J* = 3.2

Hz), 134.7 (d,  $J = 1.9$  Hz), 129.4, 128.5, 127.6, 124.1, 122.5 (d,  $J = 2.6$  Hz), 112.8 (d,  $J = 3.3$  Hz), 110.9, 102.7 (d,  $J = 2.2$  Hz), 100.7 (d,  $J = 8.5$  Hz), 64.5 (d,  $J = 7.2$  Hz), 16.0 (d,  $J = 7.1$  Hz).  $^{31}\text{P}$  NMR (162 MHz,  $\text{CDCl}_3$ )  $\delta$  19.5 (t,  $J = 4.0$  Hz). HRMS (GC/QTOF)  $m/z$ :  $[\text{M}]^+$  calcd for  $\text{C}_{18}\text{H}_{19}\text{BrNO}_3\text{PS}$ , 439.0007; found 439.0008.

### O,O-Diethyl S-(6-ethyl-2-phenylindolizin-3-yl) phosphorothioate (3d)

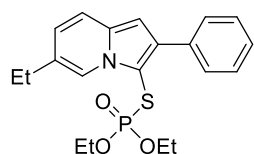

Preparative TLC on silica gel (eluent: PE/EA = 3/1, v/v) to afford **3d**. Yellow liquid (85.2 mg, 73%).  $^1\text{H}$  NMR (400 MHz,  $\text{CDCl}_3$ )  $\delta$  8.33 (s, 1H), 7.75 (d,  $J = 7.1$  Hz, 2H), 7.43 (t,  $J = 7.6$  Hz, 2H), 7.37 – 7.28 (m, 2H), 6.77 (d,  $J = 9.1$  Hz, 1H), 6.63 (s, 1H), 3.81 (q,  $J = 8.0$  Hz, 2H), 3.65 (s, 2H), 2.65 (q,  $J = 7.6$  Hz, 2H), 1.29 (t,  $J = 7.6$  Hz, 3H), 0.97 (t,  $J = 7.1$  Hz, 6H).  $^{13}\text{C}$  NMR (101 MHz,  $\text{CDCl}_3$ )  $\delta$  136.5 (d,  $J = 4.7$  Hz), 135.5 (d,  $J = 1.9$  Hz), 135.2 (d,  $J = 2.9$  Hz), 129.4, 128.4, 127.1, 126.8 (d,  $J = 1.6$  Hz), 122.1 (d,  $J = 2.7$  Hz), 121.6, 118.4 (d,  $J = 2.9$  Hz), 100.4 (d,  $J = 1.9$  Hz), 97.6 (d,  $J = 8.4$  Hz), 64.2 (d,  $J = 6.9$  Hz), 26.3, 15.9 (d,  $J = 7.3$  Hz), 15.2.  $^{31}\text{P}$  NMR (162 MHz,  $\text{CDCl}_3$ )  $\delta$  19.93 – 20.12 (m). HRMS (GC/QTOF)  $m/z$ :  $[\text{M}]^+$  calcd for  $\text{C}_{20}\text{H}_{24}\text{NO}_3\text{PS}$ , 389.1215; found 389.1222.

### O,O-Diethyl S-(2-(p-tolyl)indolizin-3-yl) phosphorothioate (3e)

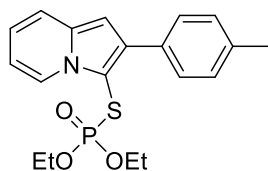

Preparative TLC on silica gel (eluent: PE/EA = 3/1, v/v) to afford **3e**. Black liquid (67.5 mg, 60%).  $^1\text{H}$  NMR (400 MHz,  $\text{CDCl}_3$ )  $\delta$  8.51 (d,  $J = 7.1$  Hz, 1H), 7.66 (d,  $J = 7.8$  Hz, 2H), 7.39 (d,  $J = 8.9$  Hz, 1H), 7.26 (d,  $J = 8.0$  Hz, 2H), 6.85 (t,  $J = 7.7$  Hz, 1H), 6.72 – 6.63 (m, 2H), 3.88 – 3.82 (m, 2H), 3.71 (q,  $J = 8.1$  Hz, 2H), 2.40 (s, 3H), 1.00 (t,  $J = 7.0$  Hz, 6H).  $^{13}\text{C}$  NMR (101 MHz,  $\text{CDCl}_3$ )  $\delta$  137.0, 136.9 (d,  $J = 4.8$  Hz), 136.2 (d,  $J = 3.1$  Hz), 132.3 (d,  $J = 1.8$  Hz), 129.3, 129.1, 124.7, 119.8 (d,  $J = 2.8$  Hz), 118.7 (d,  $J = 2.9$  Hz), 111.0 (d,  $J = 1.5$  Hz), 100.7 (d,  $J = 1.9$  Hz), 97.7 (d,  $J = 8.2$  Hz), 64.3 (d,  $J = 7.0$  Hz), 21.3, 15.9 (d,  $J = 7.2$  Hz). HRMS (GC/QTOF)  $m/z$ :  $[\text{M}]^+$  calcd for  $\text{C}_{19}\text{H}_{22}\text{NO}_3\text{PS}$ , 375.1058; found 375.1054.

### O,O-Diethyl S-(2-(4-methoxyphenyl)indolizin-3-yl) phosphorothioate (3f)

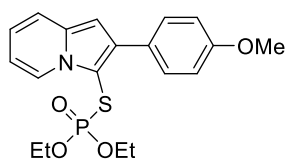

Preparative TLC on silica gel (eluent: PE/EA = 3/1, v/v) to afford **3f**. Yellow liquid (75.5 mg, 62%).  $^1\text{H}$  NMR (400 MHz,  $\text{CDCl}_3$ )  $\delta$  8.50 (d,  $J = 7.1$  Hz, 1H), 7.71 (d,  $J = 8.7$  Hz, 2H), 7.38 (d,  $J = 8.9$  Hz, 1H), 6.99 (d,  $J = 8.8$  Hz, 2H), 6.85 (t,  $J = 7.8$  Hz, 1H), 6.70 – 6.65 (m, 1H), 6.63 (s, 1H), 3.87 – 3.85 (m, 5H), 3.79 – 3.67 (m, 2H), 1.02 (t,  $J = 7.1$

Hz, 6H).  $^{13}\text{C}$  NMR (101 MHz,  $\text{CDCl}_3$ )  $\delta$  159.1, 136.6 (d,  $J = 4.8$  Hz), 136.2 (d,  $J = 3.3$  Hz), 130.5, 127.8 (d,  $J = 1.8$  Hz), 124.7, 119.8 (d,  $J = 2.8$  Hz), 118.7 (d,  $J = 3.0$  Hz), 113.9, 110.9 (d,  $J = 1.6$  Hz), 100.5 (d,  $J = 2.0$  Hz), 64.4 (d,  $J = 7.0$  Hz), 55.5, 16.0 (d,  $J = 7.1$  Hz).  $^{31}\text{P}$  NMR (162 MHz,  $\text{CDCl}_3$ )  $\delta$  20.02 - 19.82 (m). HRMS (GC/QTOF)  $m/z$ :  $[\text{M}]^+$  calcd for  $\text{C}_{18}\text{H}_{19}\text{N}_2\text{O}_5\text{PS}$ , 406.0752; found 406.0757.

### S-(2-(4-Chlorophenyl)indolizin-3-yl) O,O-diethyl phosphorothioate (3g)

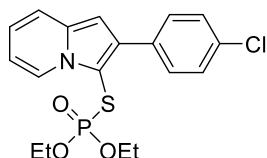

Preparative TLC on silica gel (eluent: PE/EA = 3/1, v/v) to afford **3g**. Black liquid (87.7 mg, 74%).  $^1\text{H}$  NMR (400 MHz,  $\text{CDCl}_3$ )  $\delta$  8.50 (d,  $J = 7.1$  Hz, 1H), 7.72 (d,  $J = 8.5$  Hz, 2H), 7.40 (t,  $J = 9.0$  Hz, 3H), 6.87 (t,  $J = 7.8$  Hz, 1H), 6.70 (td,  $J = 6.9, 1.3$  Hz, 1H), 6.64 (s, 1H), 3.92 - 3.86 (m, 2H), 3.79 - 3.72 (m, 2H), 1.03 (t,  $J = 7.1$  Hz, 6H).  $^{13}\text{C}$  NMR (101 MHz,  $\text{CDCl}_3$ )  $\delta$  136.2 (d,  $J = 3.1$  Hz), 135.5 (d,  $J = 4.8$  Hz), 133.7 (d,  $J = 1.9$  Hz), 133.2, 130.6, 128.5, 124.7, 120.1 (d,  $J = 2.6$  Hz), 118.8 (d,  $J = 2.8$  Hz), 111.3 (d,  $J = 1.4$  Hz), 100.7 (d,  $J = 1.9$  Hz), 97.9 (d,  $J = 8.3$  Hz), 64.4 (d,  $J = 7.1$  Hz), 15.9 (d,  $J = 7.0$  Hz).  $^{31}\text{P}$  NMR (162 MHz,  $\text{CDCl}_3$ )  $\delta$  19.85 - 19.64 (m). HRMS (GC/QTOF)  $m/z$ :  $[\text{M}]^+$  calcd for  $\text{C}_{18}\text{H}_{19}\text{ClNO}_3\text{PS}$ , 395.0512; found 395.0510.

### S-(2-(4-Bromophenyl)indolizin-3-yl) O,O-diethyl phosphorothioate (3h)

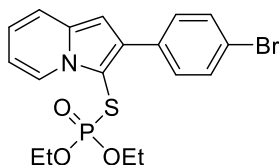

Preparative TLC on silica gel (eluent: PE/EA = 3/1, v/v) to afford **3h**. Green liquid (86.9 mg, 66%).  $^1\text{H}$  NMR (400 MHz,  $\text{CDCl}_3$ )  $\delta$  8.51 (d,  $J = 7.1$  Hz, 1H), 7.66 (d,  $J = 8.5$  Hz, 2H), 7.57 (d,  $J = 8.5$  Hz, 2H), 7.40 (d,  $J = 8.9$  Hz, 1H), 6.88 (t,  $J = 7.7$  Hz, 1H), 6.75 - 6.66 (m, 1H), 6.65 (s, 1H), 3.88 (t,  $J = 8.0$  Hz, 2H), 3.80 - 3.74 (m, 2H), 1.04 (t,  $J = 7.1$  Hz, 6H).  $^{13}\text{C}$  NMR (101 MHz,  $\text{CDCl}_3$ )  $\delta$  136.3 (d,  $J = 3.1$  Hz), 135.6 (d,  $J = 4.7$  Hz), 134.3 (d,  $J = 1.8$  Hz), 131.6, 131.0, 124.8, 121.4, 120.2 (d,  $J = 2.9$  Hz), 118.9 (d,  $J = 2.8$  Hz), 111.4, 100.7 (d,  $J = 1.8$  Hz), 98.0 (d,  $J = 8.0$  Hz), 64.5 (d,  $J = 7.2$  Hz), 16.0 (d,  $J = 7.1$  Hz).  $^{31}\text{P}$  NMR (162 MHz,  $\text{CDCl}_3$ )  $\delta$  19.82 - 19.62 (m). HRMS (GC/QTOF)  $m/z$ :  $[\text{M}]^+$  calcd for  $\text{C}_{18}\text{H}_{19}\text{BrNO}_3\text{PS}$ , 439.0007; found 439.0011.

### S-(2-(4-Cyanophenyl)indolizin-3-yl) O,O-diethyl phosphorothioate (3i)

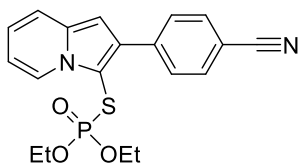

Preparative TLC on silica gel (eluent: PE/EA = 3/1, v/v) to afford **3i**. Green liquid (84.5 mg, 73%).  $^1\text{H}$  NMR (400 MHz,  $\text{CDCl}_3$ )  $\delta$  8.51 (d,  $J = 7.1$  Hz, 1H),

7.92 (d,  $J = 7.9$  Hz, 2H), 7.72 (d,  $J = 8.1$  Hz, 3H), 7.42 (d,  $J = 8.9$  Hz, 1H), 6.90 (t,  $J = 7.8$  Hz, 1H), 6.73 (t,  $J = 6.9$  Hz, 1H), 6.69 (s, 1H), 3.92 (q,  $J = 8.1, 7.7$  Hz, 2H), 3.80 (q,  $J = 8.2$  Hz, 2H), 1.05 (t,  $J = 7.1$  Hz, 6H).  $^{13}\text{C}$  NMR (101 MHz,  $\text{CDCl}_3$ )  $\delta$  140.1 (d,  $J = 1.9$  Hz), 136.4 (d,  $J = 2.9$  Hz), 134.6 (d,  $J = 4.7$  Hz), 132.2, 129.8, 124.7, 120.5 (d,  $J = 2.6$  Hz), 119.1, 119.1 (d,  $J = 2.7$  Hz), 111.8 (d,  $J = 1.4$  Hz), 110.6, 101.0 (d,  $J = 1.6$  Hz), 98.5 (d,  $J = 8.2$  Hz), 64.6 (d,  $J = 7.3$  Hz), 16.0 (d,  $J = 6.8$  Hz).  $^{31}\text{P}$  NMR (162 MHz,  $\text{CDCl}_3$ ) 19.70 – 19.50 (m). HRMS (GC/QTOF)  $m/z$ :  $[\text{M}]^+$  calcd for  $\text{C}_{19}\text{H}_{19}\text{N}_2\text{O}_3\text{PS}$ , 386.0854; found 386.0848.

### O,O-Diethyl S-(2-(4-(trifluoromethyl)phenyl)indolizin-3-yl) phosphorothioate (3j)

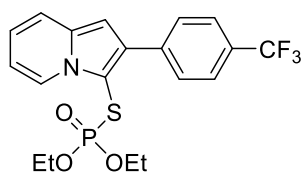

Preparative TLC on silica gel (eluent: PE/EA = 3/1, v/v) to afford **3j**. Yellow liquid (87.5 mg, 68%).  $^1\text{H}$  NMR (400 MHz,  $\text{CDCl}_3$ )  $\delta$  8.52 (d,  $J = 7.1$  Hz, 1H), 7.91 (d,  $J = 8.0$  Hz, 2H), 7.70 (d,  $J = 8.1$  Hz, 2H), 7.42 (d,  $J = 8.9$  Hz, 1H), 6.90 (t,  $J = 7.7$  Hz, 1H), 6.77 – 6.68 (m, 2H), 3.88 (q,  $J = 8.0$  Hz, 2H), 3.75 (q,  $J = 8.1$  Hz, 2H), 1.01 (t,  $J = 7.1$  Hz, 6H).  $^{13}\text{C}$  NMR (101 MHz,  $\text{CDCl}_3$ )  $\delta$  139.0, 136.4 (d,  $J = 3.0$  Hz), 135.2 (d,  $J = 4.7$  Hz), 129.6, 129.2 (d,  $J = 32.5$  Hz), 125.3 (q,  $J = 3.8$  Hz), 124.8, 124.4 (d,  $J = 272.0$  Hz), 120.3 (d,  $J = 2.6$  Hz), 119.0 (d,  $J = 2.7$  Hz), 111.6 (d,  $J = 1.4$  Hz), 100.9 (d,  $J = 1.7$  Hz), 98.4 (d,  $J = 8.3$  Hz), 64.5 (d,  $J = 7.3$  Hz), 15.9 (d,  $J = 7.1$  Hz).  $^{31}\text{P}$  NMR (162 MHz,  $\text{CDCl}_3$ )  $\delta$  19.69 – 19.49 (m). HRMS (GC/QTOF)  $m/z$ :  $[\text{M}]^+$  calcd for  $\text{C}_{19}\text{H}_{19}\text{F}_3\text{NO}_3\text{PS}$ , 429.0775; found 429.0773.

### O,O-Diethyl S-(2-(3-methoxyphenyl)indolizin-3-yl) phosphorothioate (3k)

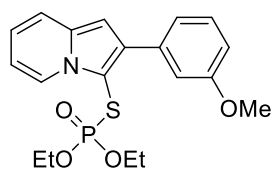

Preparative TLC on silica gel (eluent: PE/EA = 3/1, v/v) to afford **3k**. Green liquid (89.1 mg, 76%).  $^1\text{H}$  NMR (400 MHz,  $\text{CDCl}_3$ )  $\delta$  8.52 (d,  $J = 7.1$  Hz, 1H), 7.39 (d,  $J = 9.0$  Hz, 1H), 7.35 (d,  $J = 5.9$  Hz, 3H), 6.92 – 6.81 (m, 2H), 6.71 – 6.66 (m, 2H), 3.87 – 3.77 (m, 5H), 3.79 – 3.67 (m, 2H), 1.01 (t,  $J = 7.1$  Hz, 6H).  $^{13}\text{C}$  NMR (101 MHz,  $\text{CDCl}_3$ )  $\delta$  159.6, 136.7 (d,  $J = 4.8$  Hz), 136.6 (d,  $J = 1.9$  Hz), 136.1 (d,  $J = 3.1$  Hz), 129.4, 124.7, 121.9, 119.9 (d,  $J = 2.8$  Hz), 118.8 (d,  $J = 2.9$  Hz), 114.8, 113.0, 111.1 (d,  $J = 1.4$  Hz), 100.9 (d,  $J = 1.9$  Hz), 98.0 (d,  $J = 8.3$  Hz), 64.3 (d,  $J = 7.1$  Hz), 55.4, 15.9 (d,  $J = 7.1$  Hz).  $^{31}\text{P}$  NMR (162 MHz,  $\text{CDCl}_3$ )  $\delta$  19.91 – 19.71 (m). HRMS (GC/QTOF)  $m/z$ :  $[\text{M}]^+$  calcd for  $\text{C}_{19}\text{H}_{22}\text{NO}_4\text{PS}$ , 391.1007; found 391.1006.

### O,O-Diethyl S-(2-(3-fluorophenyl)indolizin-3-yl) phosphorothioate (3l)

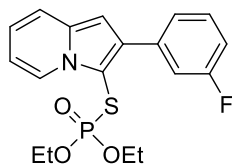

Preparative TLC on silica gel (eluent: PE/EA = 3/1, v/v) to afford **3l**. Black liquid (84.1 mg, 74%).  $^1\text{H}$  NMR (400 MHz,  $\text{CDCl}_3$ )  $\delta$  8.51 (d,  $J = 7.2$  Hz, 1H), 7.54 (dd,  $J = 12.2, 9.4$  Hz, 2H), 7.44 – 7.34 (m, 2H), 7.03 (t,  $J = 8.5$  Hz, 1H), 6.87 (t,  $J = 7.8$  Hz, 1H), 6.70 (t,  $J = 6.8$  Hz, 1H), 6.66 (s, 1H), 3.92 – 3.86 (m, 2H), 3.84 – 3.70 (m, 2H), 1.03 (t,  $J = 7.1$  Hz, 6H).  $^{13}\text{C}$  NMR (101 MHz,  $\text{CDCl}_3$ )  $\delta$  162.8 (d,  $J = 244.9$  Hz), 137.7 – 137.2 (m), 136.2 (d,  $J = 3.0$  Hz), 135.7 – 135.1 (m), 129.8 (d,  $J = 8.4$  Hz), 125.0 (d,  $J = 2.9$  Hz), 124.7, 120.1 (d,  $J = 2.6$  Hz), 118.9 (d,  $J = 2.9$  Hz), 116.1 (d,  $J = 22.1$  Hz), 113.9 (d,  $J = 21.0$  Hz), 111.4 (d,  $J = 1.4$  Hz), 100.8 (d,  $J = 1.8$  Hz), 98.1 (d,  $J = 8.3$  Hz), 64.4 (d,  $J = 7.1$  Hz), 15.9 (d,  $J = 7.0$  Hz).  $^{31}\text{P}$  NMR (162 MHz,  $\text{CDCl}_3$ )  $\delta$  19.76 – 19.55 (m). HRMS (GC/QTOF)  $m/z$ :  $[\text{M}]^+$  calcd for  $\text{C}_{18}\text{H}_{19}\text{FNO}_3\text{PS}$ , 379.0807; found 379.0811.

### S-(2-(3-Chlorophenyl)indolizin-3-yl) O,O-diethyl phosphorothioate (**3m**)

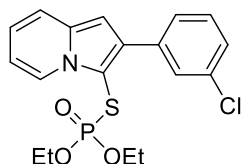

Preparative TLC on silica gel (eluent: PE/EA = 3/1, v/v) to afford **3m**. Yellow liquid (91.0 mg, 77%).  $^1\text{H}$  NMR (400 MHz,  $\text{CDCl}_3$ )  $\delta$  8.51 (d,  $J = 7.1$  Hz, 1H), 7.79 (s, 1H), 7.65 (d,  $J = 7.6$  Hz, 1H), 7.43 – 7.27 (m, 3H), 6.87 (t,  $J = 7.8$  Hz, 1H), 6.70 (t,  $J = 6.9$  Hz, 1H), 6.66 (s, 1H), 3.89 (q,  $J = 8.3$  Hz, 2H), 3.77 (q,  $J = 8.1$  Hz, 2H), 1.04 (t,  $J = 7.1$  Hz, 6H).  $^{13}\text{C}$  NMR (101 MHz,  $\text{CDCl}_3$ )  $\delta$  137.1 (d,  $J = 1.8$  Hz), 136.2 (d,  $J = 2.9$  Hz), 135.2 (d,  $J = 4.8$  Hz), 134.2, 129.6, 129.2, 127.5, 127.2, 124.7, 120.1 (d,  $J = 2.6$  Hz), 118.9 (d,  $J = 2.9$  Hz), 111.4, 100.8 (d,  $J = 1.7$  Hz), 98.2 (d,  $J = 8.3$  Hz), 64.4 (d,  $J = 7.2$  Hz), 15.9 (d,  $J = 7.1$  Hz).  $^{31}\text{P}$  NMR (162 MHz,  $\text{CDCl}_3$ )  $\delta$  19.76 – 19.56 (m). HRMS (GC/QTOF)  $m/z$ :  $[\text{M}]^+$  calcd for  $\text{C}_{18}\text{H}_{19}\text{ClNO}_3\text{PS}$ , 394.0512; found 394.0522.

### S-(2-(3-Bromophenyl)indolizin-3-yl) O,O-diethyl phosphorothioate (**3n**)

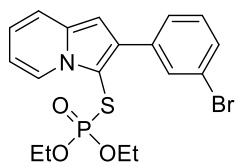

Preparative TLC on silica gel (eluent: PE/EA = 3/1, v/v) to afford **3n**. Green liquid (93.5 mg, 71%).  $^1\text{H}$  NMR (400 MHz,  $\text{CDCl}_3$ )  $\delta$  8.51 (d,  $J = 7.1$  Hz, 1H), 7.95 (s, 1H), 7.70 (d,  $J = 7.7$  Hz, 1H), 7.46 (d,  $J = 8.0$  Hz, 1H), 7.40 (d,  $J = 8.9$  Hz, 1H), 7.31 (t,  $J = 7.9$  Hz, 1H), 6.87 (t,  $J = 7.8$  Hz, 1H), 6.70 (t,  $J = 6.8$  Hz, 1H), 6.66 (s, 1H), 3.90 (q,  $J = 8.1$  Hz, 2H), 3.77 (q,  $J = 8.4$  Hz, 2H), 1.04 (t,  $J = 7.1$  Hz, 6H).  $^{13}\text{C}$  NMR (101 MHz,  $\text{CDCl}_3$ )  $\delta$  137.5 (d,  $J = 1.9$  Hz), 136.2 (d,  $J = 3.0$  Hz), 135.1 (d,  $J = 4.8$  Hz), 132.1, 130.1, 129.9, 128.0, 124.7, 122.4, 120.1 (d,  $J = 2.6$  Hz), 118.9 (d,  $J = 2.8$  Hz), 111.4 (d,  $J = 1.5$  Hz), 100.8 (d,  $J = 1.9$  Hz), 98.2 (d,  $J = 8.2$  Hz), 64.5 (d,  $J = 7.1$  Hz), 16.0 (d,  $J = 7.1$  Hz).  $^{31}\text{P}$  NMR (162 MHz,  $\text{CDCl}_3$ )  $\delta$  19.77 – 19.56 (m). HRMS (GC/QTOF)  $m/z$ :  $[\text{M}]^+$  calcd for  $\text{C}_{18}\text{H}_{19}\text{BrNO}_3\text{PS}$ , 439.0007; found 439.0005.

### O,O-Diethyl S-(2-(3-nitrophenyl)indolizin-3-yl) phosphorothioate (3o)

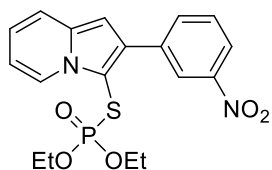

Preparative TLC on silica gel (eluent: PE/EA = 3/1, v/v) to afford **3o**. Yellow liquid (63.3 mg, 52%). <sup>1</sup>H NMR (400 MHz, CDCl<sub>3</sub>) δ 8.72 (s, 1H), 8.54 (d, *J* = 7.1 Hz, 1H), 8.23 – 8.13 (m, 2H), 7.62 (t, *J* = 8.0 Hz, 1H), 7.44 (d, *J* = 8.9 Hz, 1H), 6.92 (t, *J* = 7.8 Hz, 1H), 6.76 (d, *J* = 6.6 Hz, 2H), 3.96 (q, *J* = 8.3 Hz, 2H), 3.86 (q, *J* = 8.3 Hz, 2H), 1.08 (t, *J* = 7.1 Hz, 6H). <sup>13</sup>C NMR (101 MHz, CDCl<sub>3</sub>) δ 148.5, 137.2, 136.5, 135.3, 134.2, 129.4, 124.8, 124.0, 122.0, 120.6 (d, *J* = 2.6 Hz), 119.1 (d, *J* = 2.8 Hz), 111.8, 100.9, 98.4, 64.7 (d, *J* = 7.3 Hz), 16.1 (d, *J* = 6.8 Hz). <sup>31</sup>P NMR (162 MHz, CDCl<sub>3</sub>) δ 19.81 – 19.60 (m). HRMS (GC/QTOF) *m/z*: [M]<sup>+</sup> calcd for C<sub>18</sub>H<sub>19</sub>N<sub>2</sub>O<sub>5</sub>PS, 406.0752; found 406.0757.

### T-(2-(3,4-Difluorophenyl)indolizin-3-yl) O,O-diethyl phosphorothioate (3p)

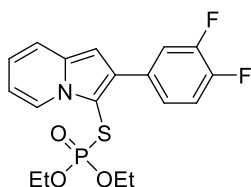

Preparative TLC on silica gel (eluent: PE/EA = 3/1, v/v) to afford **3p**. Yellow liquid (66.7 mg, 56%). <sup>1</sup>H NMR (400 MHz, CDCl<sub>3</sub>) δ 8.50 (d, *J* = 7.1 Hz, 1H), 7.66 (t, 1H), 7.50 (t, 1H), 7.40 (d, *J* = 8.9 Hz, 1H), 7.23 (d, *J* = 10.2 Hz, 1H), 6.89 (t, *J* = 7.8 Hz, 1H), 6.71 (t, *J* = 6.8 Hz, 1H), 6.63 (s, 1H), 3.94 – 3.91 (m, 2H), 3.86 – 3.80 (m, 2H), 1.08 (t, *J* = 7.1 Hz, 6H). <sup>13</sup>C NMR (101 MHz, CDCl<sub>3</sub>) δ 151.8 – 150.7 (m), 149.2 – 148.3 (m), 136.3 (d, *J* = 2.9 Hz), 134.7 (d, *J* = 3.8 Hz), 132.4, 125.4 (t), 124.7, 120.3 (d, *J* = 2.7 Hz), 118.9 (d, *J* = 2.9 Hz), 118.2 (d, *J* = 18.0 Hz), 117.2 (d, *J* = 17.2 Hz), 111.5 (d, *J* = 1.4 Hz), 100.8 (d, *J* = 1.6 Hz), 98.0 (d, *J* = 8.2 Hz), 64.5 (d, *J* = 7.2 Hz), 16.0 (d, *J* = 6.9 Hz). <sup>31</sup>P NMR (162 MHz, CDCl<sub>3</sub>) δ 19.89 – 19.69 (m). HRMS (GC/QTOF) *m/z*: [M]<sup>+</sup> calcd for C<sub>18</sub>H<sub>18</sub>F<sub>2</sub>NO<sub>3</sub>PS, 397.0713; found 397.0710.

### O,O-Diethyl S-(2-(naphthalen-2-yl)indolizin-3-yl) phosphorothioate (3q)

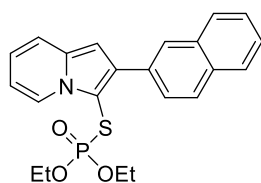

Preparative TLC on silica gel (eluent: PE/EA = 3/1, v/v) to afford **3q**. Yellow liquid (78.9 mg, 64%). <sup>1</sup>H NMR (400 MHz, CDCl<sub>3</sub>) δ 8.56 (d, *J* = 7.1 Hz, 1H), 8.27 (s, 1H), 7.94 – 7.85 (m, 4H), 7.86 (d, *J* = 5.9 Hz, 1H), 7.56 – 7.44 (m, 1H), 7.44 (d, *J* = 8.9 Hz, 1H), 6.89 (t, *J* = 7.8 Hz, 1H), 6.80 (s, 1H), 6.72 (t, *J* = 6.9 Hz, 1H), 3.90 – 3.75 (m, 2H), 3.70 – 3.64 (m, 2H), 0.91 (t, *J* = 7.0 Hz, 6H). <sup>13</sup>C NMR (101 MHz, CDCl<sub>3</sub>) δ 136.8 (d, *J* = 4.8 Hz), 136.4 (d, *J* = 3.1 Hz), 133.5, 132.7 (d, *J* = 1.9 Hz), 132.6, 128.2, 128.1, 127.9, 127.7, 127.7, 126.3, 126.1, 124.8, 120.0 (d, *J* = 2.7 Hz), 118.9 (d, *J* = 2.9 Hz), 111.2 (d, *J* = 1.4 Hz), 101.1 (d, *J* = 1.9 Hz),

98.3 (d,  $J = 8.1$  Hz), 64.4 (d,  $J = 7.0$  Hz), 15.9 (d,  $J = 7.1$  Hz).  $^{31}\text{P}$  NMR (162 MHz,  $\text{CDCl}_3$ )  $\delta$  19.91 – 19.71 (m). HRMS (GC/QTOF)  $m/z$ :  $[\text{M}]^+$  calcd for  $\text{C}_{22}\text{H}_{22}\text{NO}_3\text{PS}$ , 411.1058; found 411.1049.

### S-(2-(4-Bromophenyl)-7-methoxyindolizin-3-yl) O,O-diethyl phosphorothioate (3r)

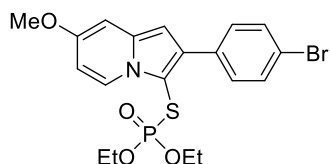

Preparative TLC on silica gel (eluent: PE/EA = 3/1, v/v) to afford **3r**. Yellow liquid (77.4 mg, 55%).  $^1\text{H}$  NMR (400 MHz,  $\text{CDCl}_3$ )  $\delta$  8.36 (d,  $J = 7.7$  Hz, 1H), 7.65 (d,  $J = 8.2$  Hz, 2H), 7.56 (d,  $J = 8.3$  Hz, 2H), 6.65 (d,  $J = 2.4$  Hz, 1H), 6.45 (t, 2H), 3.91 – 3.89 (m, 2H), 3.83 (s, 3H), 3.83 – 3.72 (m, 2H), 1.05 (t,  $J = 7.1$  Hz, 6H).  $^{13}\text{C}$  NMR (101 MHz,  $\text{CDCl}_3$ )  $\delta$  154.4 (d,  $J = 1.9$  Hz), 137.2 (d,  $J = 2.8$  Hz), 136.2 (2 C), 134.5 (d,  $J = 1.7$  Hz), 131.5, 130.8, 126.0, 121.3, 106.5, 98.8, 95.5 (d,  $J = 2.4$  Hz), 64.5 (d,  $J = 7.2$  Hz), 55.5, 16.1 (d,  $J = 7.0$  Hz).  $^{31}\text{P}$  NMR (162 MHz,  $\text{CDCl}_3$ )  $\delta$  19.93 – 19.73 (m). HRMS (GC/QTOF)  $m/z$ :  $[\text{M}]^+$  calcd for  $\text{C}_{19}\text{H}_{21}\text{BrNO}_4\text{PS}$ , 469.0112; found 469.0107.

### S,S'-(2-(3,4-Dichlorophenyl)indolizine-1,3-diyl) O,O,O',O'-tetraethyl bis(phosphorothioate) (3s)

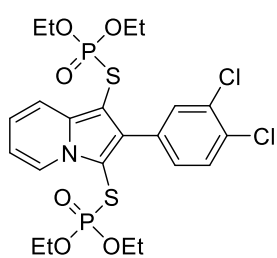

Preparative TLC on silica gel (eluent: PE/EA = 3/1, v/v) to afford **3s**. Yellow liquid (94.9 mg, 53%).  $^1\text{H}$  NMR (400 MHz,  $\text{CDCl}_3$ )  $\delta$  8.56 (d,  $J = 7.0$  Hz, 1H), 7.91 (s, 1H), 7.78 (d,  $J = 8.9$  Hz, 1H), 7.57 (s, 2H), 7.12 (t,  $J = 7.9$  Hz, 1H), 6.86 (t,  $J = 6.8$  Hz, 1H), 4.01 – 3.90 (m, 4H), 3.87 – 3.80 (m, 4H), 1.18 – 1.09 (m, 12H).  $^{13}\text{C}$  NMR (101 MHz,  $\text{CDCl}_3$ )  $\delta$  139.8, 138.4, 133.4, 133.1, 132.1, 132.0, 130.9, 130.0, 125.4, 122.6, 118.3, 113.0, 101.9, 91.4, 64.7 (d,  $J = 7.2$  Hz), 64.1 (d,  $J = 6.7$  Hz), 16.1 (2 C).  $^{31}\text{P}$  NMR (162 MHz,  $\text{CDCl}_3$ )  $\delta$  22.65, 19.25. HRMS (GC/QTOF)  $m/z$ :  $[\text{M}]^+$  calcd for  $\text{C}_{22}\text{H}_{27}\text{Cl}_2\text{NO}_6\text{P}_2\text{S}_2$ , 597.0132; found 597.0123.

### Diethyl (3-mercapto-2-phenylindolizin-1-yl)phosphonate (4a)

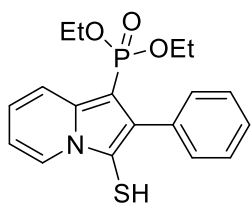

Preparative TLC on silica gel (eluent: PE/EA = 3/1, v/v) to afford **4a**. Black liquid (87.7 mg, 81%).  $^1\text{H}$  NMR (400 MHz,  $\text{CDCl}_3$ )  $\delta$  8.51 (d,  $J = 7.1$  Hz, 1H), 7.62 (d,  $J = 7.3$  Hz, 2H), 7.51 – 7.45 (m, 3H), 7.39 (t,  $J = 7.4$  Hz, 1H), 7.03 – 6.93 (m, 1H), 6.76 (t,  $J = 6.8$  Hz, 1H), 3.87 – 3.75 (m, 2H), 3.71 – 3.58 (m, 2H), 1.04 (t,  $J = 7.1$  Hz, 6H).  $^{13}\text{C}$  NMR (101 MHz,  $\text{CDCl}_3$ )  $\delta$  135.4 (d,  $J = 4.7$  Hz), 134.2 (d,  $J = 3.2$  Hz), 133.0 (d,  $J = 1.7$  Hz), 131.0, 128.1, 127.9, 124.9, 121.0 (d,  $J = 2.6$  Hz), 117.7 (d,  $J = 2.9$  Hz), 112.0 (d,  $J = 1.4$  Hz), 99.8 (d,  $J = 8.4$

Hz), 87.8 (d,  $J = 2.2$  Hz), 64.4 (d2,  $J = 7.1$  Hz), 16.0 (d,  $J = 7.1$  Hz). HRMS (GC/QTOF)  $m/z$ :  $[M]^+$  calcd for  $C_{18}H_{20}NO_3PS$ , 361.0902; found 361.0901.

#### Diethyl (6-ethyl-3-mercapto-2-phenylindolizin-1-yl)phosphonate (4b)

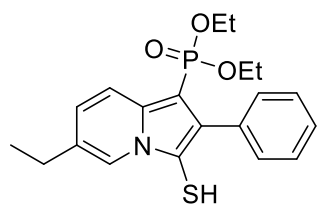

Preparative TLC on silica gel (eluent: PE/EA = 3/1, v/v) to afford **4b**. Yellow liquid (72.4 mg, 62%).  $^1H$  NMR (400 MHz,  $CDCl_3$ )  $\delta$  8.32 (s, 1H), 7.62 (d,  $J = 7.3$  Hz, 2H), 7.47 (t,  $J = 7.6$  Hz, 2H), 7.45 - 7.36 (m, 2H), 6.88 (d,  $J = 9.1$  Hz, 1H), 3.80 (q,  $J = 8.0$  Hz, 2H), 3.60 (s, 2H), 2.66 (q,  $J = 7.5$  Hz, 2H), 1.29 (t,  $J = 7.5$  Hz, 3H), 1.03 (t,  $J = 7.1$  Hz, 6H).  $^{13}C$  NMR (101 MHz,  $CDCl_3$ )  $\delta$  134.9 (d,  $J = 4.7$  Hz), 133.3 (d,  $J = 3.3$  Hz), 133.1 (d,  $J = 1.7$  Hz), 130.9, 128.1, 127.8 (d,  $J = 1.4$  Hz), 127.7, 123.1 (d,  $J = 2.6$  Hz), 121.7, 117.3 (d,  $J = 2.8$  Hz), 99.3 (d,  $J = 8.2$  Hz), 87.3 (d,  $J = 1.9$  Hz), 64.2 (d,  $J = 6.9$  Hz), 26.2, 16.0 (d,  $J = 7.2$  Hz), 15.1.  $^{31}P$  NMR (162 MHz,  $CDCl_3$ )  $\delta$  19.84 - 19.64 (m). HRMS (GC/QTOF)  $m/z$ :  $[M]^+$  calcd for  $C_{20}H_{24}NO_3PS$ , 389.1215; found 389.1214.

#### Diethyl (3-mercapto-2-(p-tolyl)indolizin-1-yl)phosphonate (4c)

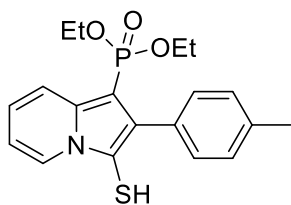

Preparative TLC on silica gel (eluent: PE/EA = 3/1, v/v) to afford **4c**. Black liquid (73.1 mg, 65%).  $^1H$  NMR (400 MHz,  $CDCl_3$ )  $\delta$  8.51 (d,  $J = 7.1$  Hz, 1H), 7.52 (d,  $J = 7.8$  Hz, 2H), 7.47 (d,  $J = 9.0$  Hz, 1H), 7.29 (d,  $J = 7.8$  Hz, 2H), 6.97 (t,  $J = 7.8$  Hz, 1H), 6.74 (t,  $J = 6.8$  Hz, 1H), 3.83 (q,  $J = 8.0$  Hz, 2H), 3.73 - 3.62 (m, 2H), 2.42 (s, 3H), 1.06 (t,  $J = 7.1$  Hz, 6H).  $^{13}C$  NMR (101 MHz,  $CDCl_3$ )  $\delta$  137.6, 135.4 (d,  $J = 4.6$  Hz), 134.2 (d,  $J = 3.2$  Hz), 130.8, 129.9, 128.8, 124.8, 120.9 (d,  $J = 2.6$  Hz), 117.6 (d,  $J = 2.9$  Hz), 111.8, 99.6 (d,  $J = 8.4$  Hz), 87.8, 64.3 (d,  $J = 7.3$  Hz), 21.4, 16.0 (d,  $J = 7.1$  Hz).  $^{31}P$  NMR (162 MHz,  $CDCl_3$ )  $\delta$  19.61 - 19.41 (m). HRMS (GC/QTOF)  $m/z$ :  $[M]^+$  calcd for  $C_{19}H_{22}NO_3PS$ , 375.1058; found 375.1063.

#### Diethyl (3-mercapto-2-(4-methoxyphenyl)indolizin-1-yl)phosphonate (4d)

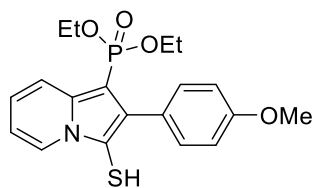

Preparative TLC on silica gel (eluent: PE/EA = 3/1, v/v) to afford **4d**. Black liquid (65.7 mg, 56%).  $^1H$  NMR (400 MHz,  $CDCl_3$ )  $\delta$  8.50 (d,  $J = 7.1$  Hz, 1H), 7.56 (d,  $J = 8.3$  Hz, 2H), 7.46 (d,  $J = 8.9$  Hz, 1H), 7.02 (d,  $J = 8.3$  Hz, 3H), 6.96 (d,  $J = 8.0$  Hz, 1H), 6.74 (t,  $J = 6.8$  Hz, 1H), 3.87 - 3.80 (m, 5H), 3.74 - 3.66 (m, 2H), 1.07 (t,  $J = 7.4$  Hz, 6H).  $^{13}C$  NMR (101 MHz,  $CDCl_3$ )  $\delta$  159.4, 135.2 (d,  $J = 4.8$  Hz), 134.2 (d,



$J = 3.2$  Hz), 132.1, 125.3 (d,  $J = 1.7$  Hz), 124.9, 120.9 (d,  $J = 2.6$  Hz), 117.6 (d,  $J = 2.9$  Hz), 113.6, 111.8, 99.5 (d,  $J = 8.2$  Hz), 87.9 (d,  $J = 2.1$  Hz), 64.4 (d,  $J = 7.2$  Hz), 55.5, 16.1 (d,  $J = 7.2$  Hz). HRMS (GC/QTOF)  $m/z$ :  $[M]^+$  calcd for  $C_{19}H_{22}NO_4PS$ , 391.1007; found 391.1007.

#### Diethyl (2-(4-fluorophenyl)-3-mercaptoindolizin-1-yl)phosphonate (4e)

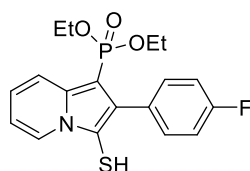

Preparative TLC on silica gel (eluent: PE/EA = 3/1, v/v) to afford **4e**. Green liquid (81.9 mg, 72%).  $^1H$  NMR (400 MHz,  $CDCl_3$ )  $\delta$  8.50 (d,  $J = 7.1$  Hz, 1H), 7.65 – 7.57 (m, 2H), 7.47 (d,  $J = 9.0$  Hz, 1H), 7.18 (t,  $J = 8.7$  Hz, 2H), 6.99 (t,  $J = 7.7$  Hz, 1H), 6.76 (t,  $J = 6.8$  Hz, 1H), 3.87 (q,  $J = 8.0$  Hz, 2H), 3.73 (q,  $J = 8.5$  Hz, 2H), 1.09 (t,  $J = 7.1$  Hz, 6H).  $^{13}C$  NMR (101 MHz,  $CDCl_3$ )  $\delta$  162.6 (d,  $J = 247.6$  Hz), 134.5 (d,  $J = 5.0$  Hz), 134.2 (d,  $J = 3.2$  Hz), 132.7 (d,  $J = 8.1$  Hz), 129.0, 124.9, 121.1 (d,  $J = 2.7$  Hz), 117.7 (d,  $J = 2.8$  Hz), 115.2 (d,  $J = 21.4$  Hz), 112.1, 99.7 (d,  $J = 8.0$  Hz), 87.8 (d,  $J = 2.2$  Hz), 64.5 (d,  $J = 7.1$  Hz), 16.1 (d,  $J = 7.1$  Hz). HRMS (GC/QTOF)  $m/z$ :  $[M]^+$  calcd for  $C_{18}H_{19}FNO_3PS$ , 379.0807; found 379.0801.

#### Diethyl (2-(4-chlorophenyl)-3-mercaptoindolizin-1-yl)phosphonate (4f)

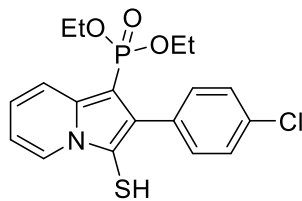

Preparative TLC on silica gel (eluent: PE/EA = 3/1, v/v) to afford **4f**. Green liquid (83.0 mg, 70%).  $^1H$  NMR (400 MHz,  $CDCl_3$ )  $\delta$  8.50 (d,  $J = 7.1$  Hz, 1H), 7.58 (d,  $J = 8.4$  Hz, 2H), 7.47 (t,  $J = 7.9$  Hz, 3H), 6.99 (t,  $J = 7.8$  Hz, 1H), 6.77 (t,  $J = 6.8$  Hz, 1H), 3.93 – 3.82 (m, 2H), 3.80 – 3.69 (m, 2H), 1.09 (t,  $J = 7.1$  Hz, 6H).  $^{13}C$  NMR (101 MHz,  $CDCl_3$ )  $\delta$  134.3 (2 C), 134.0, 132.3, 131.5 (d,  $J = 1.6$  Hz), 128.4, 124.9, 121.2 (d,  $J = 2.6$  Hz), 117.8 (d,  $J = 2.8$  Hz), 112.2, 99.7, 87.7, 64.5 (d,  $J = 7.3$  Hz), 16.1 (d,  $J = 7.0$  Hz). HRMS (GC/QTOF)  $m/z$ :  $[M]^+$  calcd for  $C_{18}H_{19}ClNO_3PS$ , 395.0512; found 395.0507.

#### Diethyl (2-(4-cyanophenyl)-3-mercaptoindolizin-1-yl)phosphonate (4g)

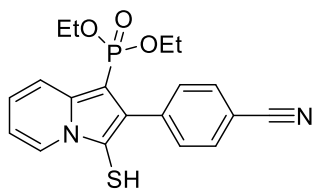

Preparative TLC on silica gel (eluent: PE/EA = 3/1, v/v) to afford **4g**. Green liquid (67.2 mg, 58%).  $^1H$  NMR (400 MHz,  $CDCl_3$ )  $\delta$  8.51 (d,  $J = 7.1$  Hz, 1H), 7.79 (d,  $J = 2.5$  Hz, 4H), 7.50 (d,  $J = 8.9$  Hz, 1H), 7.07 – 6.97 (m, 1H), 6.85 – 6.76 (m, 1H), 3.91 (q,  $J = 8.1$  Hz, 2H), 3.78 (q,  $J = 9.0$  Hz, 2H), 1.11 (t,  $J = 7.1$  Hz, 6H).  $^{13}C$  NMR (101 MHz,  $CDCl_3$ )  $\delta$  138.0 (d,  $J = 1.7$  Hz), 134.5 (d,  $J = 2.9$  Hz), 133.5 (d,  $J = 4.8$  Hz), 131.9, 131.7, 124.9, 121.5 (d,  $J = 2.5$  Hz), 119.0, 117.9 (d,  $J = 2.6$  Hz), 112.6, 111.4, 100.0 (d,  $J = 8.1$  Hz),

87.6, 64.6 (d,  $J = 7.3$  Hz), 16.1 (d,  $J = 6.9$  Hz). HRMS (GC/QTOF)  $m/z$ :  $[M]^+$  calcd for  $C_{19}H_{19}N_2O_3PS$ , 386.0854; found 386.0864.

#### Diethyl (3-mercapto-2-(*m*-tolyl)indolizin-1-yl)phosphonate (4h)

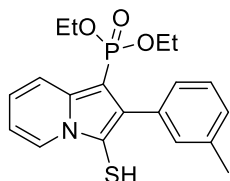

Preparative TLC on silica gel (eluent: PE/EA = 3/1, v/v) to afford **4h**. Yellow liquid (72.0 mg, 64%).  $^1H$  NMR (400 MHz,  $CDCl_3$ )  $\delta$  8.51 (d,  $J = 7.0$  Hz, 1H), 7.48 (d,  $J = 8.9$  Hz, 1H), 7.42 (d,  $J = 10.1$  Hz, 2H), 7.37 (d,  $J = 7.4$  Hz, 1H), 7.21 (d,  $J = 7.4$  Hz, 1H), 6.97 (t,  $J = 7.9$  Hz, 1H), 6.75 (t,  $J = 6.8$  Hz, 1H), 3.82 (q,  $J = 7.8$  Hz, 2H), 3.71 – 3.59 (m, 2H), 2.44 (s, 3H), 1.05 (t,  $J = 7.1$  Hz, 6H).  $^{13}C$  NMR (101 MHz,  $CDCl_3$ )  $\delta$  137.7, 135.6 (d,  $J = 4.7$  Hz), 134.2 (d,  $J = 3.2$  Hz), 132.8 (d,  $J = 1.7$  Hz), 131.6, 128.6, 128.3, 128.0, 124.9, 120.9 (d,  $J = 2.7$  Hz), 117.7 (d,  $J = 2.8$  Hz), 111.9 (d,  $J = 1.4$  Hz), 99.7 (d,  $J = 8.3$  Hz), 87.8 (d,  $J = 2.1$  Hz), 64.3 (d,  $J = 7.0$  Hz), 21.6, 16.0 (d,  $J = 7.3$  Hz). HRMS (GC/QTOF)  $m/z$ :  $[M]^+$  calcd for  $C_{19}H_{22}NO_3PS$ , 375.1058; found 375.1059.

#### Diethyl (3-mercapto-2-(3-methoxyphenyl)indolizin-1-yl)phosphonate (4i)

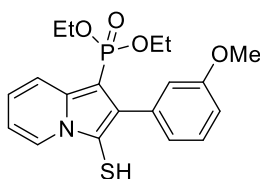

Preparative TLC on silica gel (eluent: PE/EA = 3/1, v/v) to afford **4i**. Black liquid (78.6 mg, 67%).  $^1H$  NMR (400 MHz,  $CDCl_3$ )  $\delta$  8.51 (d,  $J = 7.1$  Hz, 1H), 7.48 (d,  $J = 9.0$  Hz, 1H), 7.39 (t,  $J = 7.9$  Hz, 1H), 7.21 (d,  $J = 9.1$  Hz, 2H), 7.01 – 6.92 (m, 2H), 6.76 (t,  $J = 6.9$  Hz, 1H), 3.87 (s, 3H), 3.87 – 3.84 (m, 2H), 3.73 – 3.65 (m, 2H), 1.07 (t,  $J = 7.1$  Hz, 6H).  $^{13}C$  NMR (101 MHz,  $CDCl_3$ )  $\delta$  159.3, 135.3 (d,  $J = 4.8$  Hz), 134.2 (2 C), 129.1, 124.9, 123.4, 121.0 (d,  $J = 2.7$  Hz), 117.7 (d,  $J = 2.8$  Hz), 116.4, 113.7, 112.0, 99.8 (d,  $J = 8.2$  Hz), 87.8 (d,  $J = 2.1$  Hz), 64.4 (d,  $J = 7.1$  Hz), 55.5, 16.0 (d,  $J = 7.1$  Hz). HRMS (GC/QTOF)  $m/z$ :  $[M]^+$  calcd for  $C_{19}H_{22}NO_4PS$ , 391.1007; found 391.1017.

#### Diethyl (2-(3-fluorophenyl)-3-mercaptoindolizin-1-yl)phosphonate (4j)

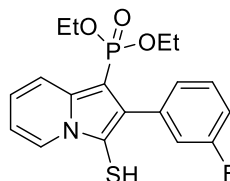

Preparative TLC on silica gel (eluent: PE/EA = 3/1, v/v) to afford **4j**. Black liquid (76.2 mg, 67%).  $^1H$  NMR (400 MHz,  $CDCl_3$ )  $\delta$  8.51 (d,  $J = 7.1$  Hz, 1H), 7.49 – 7.43 (m, 4H), 7.15 – 7.05 (m, 1H), 6.99 (t,  $J = 7.9$  Hz, 1H), 6.77 (t,  $J = 6.9$  Hz, 1H), 3.88 (q,  $J = 8.1$  Hz, 2H), 3.74 (q,  $J = 8.5$  Hz, 2H), 1.09 (t,  $J = 7.1$  Hz, 6H).  $^{13}C$  NMR (101 MHz,  $CDCl_3$ )  $\delta$  162.5 (d,  $J = 245.5$  Hz), 135.2 – 135.1 (m), 134.3 (d,  $J = 3.1$  Hz), 134.2 – 134.1 (m), 129.6 (d,  $J = 8.4$  Hz), 126.8 (d,  $J = 3.1$  Hz), 124.9, 121.2 (d,  $J = 2.6$  Hz), 118.0, 117.8 (d,  $J = 2.9$  Hz), 114.7 (d,  $J =$

21.0 Hz), 112.2 (d,  $J = 1.3$  Hz), 99.9 (d,  $J = 8.2$  Hz), 87.7 (d,  $J = 1.9$  Hz), 64.5 (d,  $J = 7.1$  Hz), 16.0 (d,  $J = 7.0$  Hz). HRMS (GC/QTOF)  $m/z$ :  $[M]^+$  calcd for  $C_{18}H_{19}FNO_3PS$ , 379.0807; found 379.0798.

#### Diethyl (2-(3-chlorophenyl)-3-mercaptoindolizin-1-yl)phosphonate (4k)

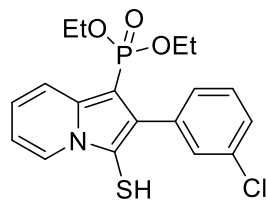

Preparative TLC on silica gel (eluent: PE/EA = 3/1, v/v) to afford **4k**. Black liquid (87.7 mg, 74%).  $^1H$  NMR (400 MHz, Chloroform- $d$ )  $\delta$  8.49 (d,  $J = 7.1$  Hz, 1H), 7.66 (s, 1H), 7.54 – 7.33 (m, 4H), 7.01 – 6.93 (m, 1H), 6.75 (t,  $J = 6.9$  Hz, 1H), 3.94 – 3.83 (m, 2H), 3.81 – 3.69 (m, 2H), 1.09 (t,  $J = 7.1$  Hz, 6H).  $^{13}C$  NMR (101 MHz,  $CDCl_3$ )  $\delta$  134.8 (d,  $J = 1.7$  Hz), 134.1 (d,  $J = 3.1$  Hz), 133.9 (2 C), 130.8, 129.3, 129.1, 127.8, 124.8, 121.1 (d,  $J = 2.6$  Hz), 117.7 (d,  $J = 2.9$  Hz), 112.2 (d,  $J = 1.2$  Hz), 99.9 (d,  $J = 8.1$  Hz), 87.6 (d,  $J = 1.9$  Hz), 64.4 (d,  $J = 7.2$  Hz), 16.0 (d,  $J = 7.1$  Hz).  $^{31}P$  NMR (162 MHz,  $CDCl_3$ )  $\delta$  19.48 – 19.27 (m). HRMS (GC/QTOF)  $m/z$ :  $[M]^+$  calcd for  $C_{18}H_{19}ClNO_3PS$ , 395.0512; found 395.0506.

#### Diethyl (2-(3-bromophenyl)-3-mercaptoindolizin-1-yl)phosphonate (4l)

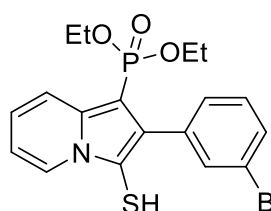

Preparative TLC on silica gel (eluent: PE/EA = 3/1, v/v) to afford **4l**. Green liquid (84.3 mg, 64%).  $^1H$  NMR (400 MHz,  $CDCl_3$ )  $\delta$  8.50 (d,  $J = 7.1$  Hz, 1H), 7.82 (d,  $J = 2.1$  Hz, 1H), 7.55 (t,  $J = 8.6$  Hz, 2H), 7.48 (d,  $J = 9.0$  Hz, 1H), 7.36 (td,  $J = 7.9, 1.9$  Hz, 1H), 7.00 (t,  $J = 7.8$  Hz, 1H), 6.78 (t,  $J = 6.9$  Hz, 1H), 3.90 (q,  $J = 8.1$  Hz, 2H), 3.76 (q,  $J = 8.2$  Hz, 2H), 1.11 (t,  $J = 7.1$  Hz, 6H).  $^{13}C$  NMR (101 MHz,  $CDCl_3$ )  $\delta$  135.2, 134.3 (d,  $J = 3.0$  Hz), 134.0, 133.9, 133.7, 130.8, 129.7, 124.9, 122.1, 121.2 (d,  $J = 2.5$  Hz), 117.8 (d,  $J = 2.7$  Hz), 112.3, 100.1, 87.7, 64.6 (d,  $J = 7.2$  Hz), 16.1 (d,  $J = 7.1$  Hz). HRMS (GC/QTOF)  $m/z$ :  $[M]^+$  calcd for  $C_{18}H_{19}BrNO_3PS$ , 439.0007; found 439.0010.

#### Diethyl (3-mercapto-2-(naphthalen-2-yl)indolizin-1-yl)phosphonate (4m)

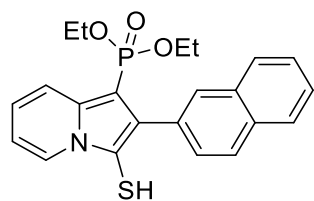

Preparative TLC on silica gel (eluent: PE/EA = 3/1, v/v) to afford **4m**. Black liquid (80.1 mg, 65%).  $^1H$  NMR (400 MHz,  $CDCl_3$ )  $\delta$  8.55 (d,  $J = 7.1$  Hz, 1H), 8.12 (s, 1H), 7.98 – 7.86 (m, 3H), 7.76 (d,  $J = 8.3$  Hz, 1H), 7.56 – 7.49 (m, 3H), 7.00 (t,  $J = 7.8$  Hz, 1H), 6.78 (t,  $J = 6.8$  Hz, 1H), 3.78 (t,  $J = 8.0$  Hz, 2H), 3.61 (t,  $J = 8.4$  Hz, 2H), 0.97 (t,  $J = 7.1$  Hz, 6H).  $^{13}C$  NMR (101 MHz,  $CDCl_3$ )  $\delta$  135.4 (d,  $J = 4.8$  Hz), 134.3 (d,  $J = 3.2$  Hz), 133.2, 132.8, 130.5 (d,  $J = 1.8$  Hz), 130.2, 128.7, 128.3, 127.8, 127.6, 126.4, 126.3, 124.9,

121.0 (d,  $J = 2.6$  Hz), 117.7 (d,  $J = 2.8$  Hz), 112.0, 100.0 (d,  $J = 8.3$  Hz), 88.0 (d,  $J = 2.1$  Hz), 64.4 (d,  $J = 7.1$  Hz), 15.9 (d,  $J = 7.2$  Hz).  $^{31}\text{P}$  NMR (162 MHz,  $\text{CDCl}_3$ )  $\delta$  19.47 (p,  $J = 8.5$  Hz). HRMS (GC/QTOF)  $m/z$ :  $[\text{M}]^+$  calcd for  $\text{C}_{22}\text{H}_{22}\text{NO}_3\text{PS}$ , 411.1058; found 411.1049.

#### Diethyl (2-(3,4-dichlorophenyl)-3-mercaptoindolizin-1-yl)phosphonate (4n)

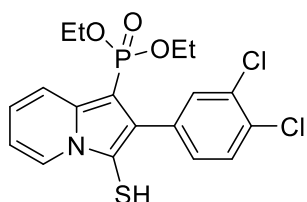

Preparative TLC on silica gel (eluent: PE/EA = 3/1, v/v) to afford **4n**. Black liquid (73.4 mg, 57%).  $^1\text{H}$  NMR (400 MHz,  $\text{CDCl}_3$ )  $\delta$  8.49 (d,  $J = 7.1$  Hz, 1H), 7.79 (s, 1H), 7.55 (d,  $J = 8.1$  Hz, 1H), 7.52 – 7.44 (m, 2H), 7.04 – 6.95 (m, 1H), 6.78 (t,  $J = 6.9$  Hz, 1H), 3.95 (q,  $J = 8.0$  Hz, 2H), 3.84 (q,  $J = 8.8$  Hz, 2H), 1.14 (t,  $J = 7.1$  Hz, 6H).  $^{13}\text{C}$  NMR (101 MHz,  $\text{CDCl}_3$ )  $\delta$  134.3 (d,  $J = 3.1$  Hz), 133.1 (d,  $J = 1.5$  Hz), 133.0, 132.6, 132.2, 132.0, 130.3, 130.1, 124.9, 121.3 (d,  $J = 2.6$  Hz), 117.8 (d,  $J = 2.8$  Hz), 112.4 (d,  $J = 1.3$  Hz), 99.9 (d,  $J = 8.0$  Hz), 87.6 (d,  $J = 1.9$  Hz), 64.6 (d,  $J = 7.2$  Hz), 16.1 (d,  $J = 7.0$  Hz). HRMS (GC/QTOF)  $m/z$ :  $[\text{M}]^+$  calcd for  $\text{C}_{18}\text{H}_{18}\text{Cl}_2\text{NO}_3\text{PS}$ , 429.0122; found 429.0116.

#### Diethyl (2-(2,4-dichlorophenyl)-3-mercaptoindolizin-1-yl)phosphonate (4o)

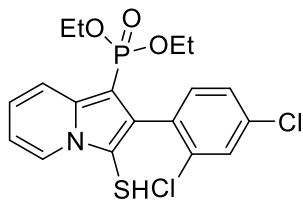

Preparative TLC on silica gel (eluent: PE/EA = 3/1, v/v) to afford **4o**. Green liquid (90.1 mg, 70%).  $^1\text{H}$  NMR (400 MHz,  $\text{CDCl}_3$ )  $\delta$  8.48 (d,  $J = 7.1$  Hz, 1H), 7.55 (d,  $J = 2.0$  Hz, 1H), 7.48 (d,  $J = 9.0$  Hz, 1H), 7.38 (q,  $J = 8.3$  Hz, 2H), 6.99 (t,  $J = 8.0$  Hz, 1H), 6.83 – 6.74 (m, 1H), 3.99 – 3.71 (m, 4H), 1.20 – 1.08 (m, 6H).  $^{13}\text{C}$  NMR (101 MHz,  $\text{CDCl}_3$ )  $\delta$  135.6, 134.9, 134.1 (d,  $J = 1.8$  Hz), 134.0 (d,  $J = 3.0$  Hz), 132.7 (d,  $J = 4.7$  Hz), 131.0 (d,  $J = 1.6$  Hz), 129.5, 126.8, 124.8, 121.0 (d,  $J = 2.5$  Hz), 117.8 (d,  $J = 2.7$  Hz), 112.3, 100.9 (d,  $J = 8.0$  Hz), 88.7, 64.6 (dd,  $J = 18.2, 7.4$  Hz), 16.1 (dd,  $J = 10.5, 6.8$  Hz).  $^{31}\text{P}$  NMR (162 MHz,  $\text{CDCl}_3$ )  $\delta$  19.38 – 19.16 (m). HRMS (GC/QTOF)  $m/z$ :  $[\text{M}]^+$  calcd for  $\text{C}_{18}\text{H}_{18}\text{Cl}_2\text{NO}_3\text{PS}$ , 429.0122; found 429.0115.

#### Dibutyl (3-mercapto-2-phenylindolizin-1-yl)phosphonate (4p)

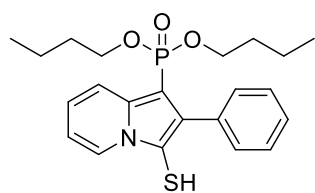

Preparative TLC on silica gel (eluent: PE/EA = 3/1, v/v) to afford **4p**. Black liquid (83.8 mg, 67%).  $^1\text{H}$  NMR (400 MHz,  $\text{CDCl}_3$ )  $\delta$  8.51 (d,  $J = 7.0$  Hz, 1H), 7.62 (d,  $J = 7.2$  Hz, 2H), 7.52 – 7.44 (m, 3H), 7.39 (t,  $J = 7.3$  Hz, 1H), 6.98 (t,  $J = 7.8$  Hz, 1H), 6.75 (t,  $J = 6.4$  Hz, 1H), 3.73 (t,  $J = 8.3$  Hz, 2H), 3.57 (d,  $J = 8.2$  Hz, 2H), 1.35 (q,  $J = 7.1$  Hz, 4H), 1.15 (q,  $J = 7.5$  Hz, 4H), 0.81 (t,  $J = 7.4$  Hz, 6H).  $^{13}\text{C}$  NMR (101 MHz,

CDCl<sub>3</sub>)  $\delta$  135.4 (d,  $J = 4.6$  Hz), 134.2 (d,  $J = 3.1$  Hz), 133.0 (d,  $J = 1.5$  Hz), 131.5, 131.0, 128.1, 127.8, 124.9, 121.0, 117.7 (d,  $J = 2.9$  Hz), 112.0, 99.8 (d,  $J = 7.9$  Hz), 87.8, 68.0 (d,  $J = 7.3$  Hz), 32.1 (d,  $J = 7.0$  Hz), 18.6 (d,  $J = 6.4$  Hz), 13.7 (d,  $J = 5.2$  Hz). HRMS (GC/QTOF)  $m/z$ : [M]<sup>+</sup> calcd for C<sub>22</sub>H<sub>28</sub>NO<sub>3</sub>PS, 417.1528; found 417.1525.

#### Diisopropyl (3-mercapto-2-phenylindolizin-1-yl)phosphonate (4q)

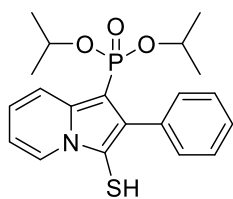

Preparative TLC on silica gel (eluent: PE/EA = 3/1, v/v) to afford **4q**. Green liquid (84.0 mg, 72%). <sup>1</sup>H NMR (400 MHz, CDCl<sub>3</sub>)  $\delta$  8.54 (d,  $J = 7.1$  Hz, 1H), 7.66 (d,  $J = 7.2$  Hz, 2H), 7.47 (t,  $J = 7.1$  Hz, 3H), 7.39 (t,  $J = 7.5$  Hz, 1H), 6.97 (t,  $J = 7.6$  Hz, 1H), 6.75 (t,  $J = 6.9$  Hz, 1H), 4.56 – 4.46 (m, 2H), 1.13 (d,  $J = 6.2$  Hz, 6H), 1.05 (d,  $J = 6.2$  Hz, 6H). <sup>13</sup>C NMR (101 MHz, CDCl<sub>3</sub>)  $\delta$  135.4 (d,  $J = 5.1$  Hz), 134.1 (d,  $J = 3.3$  Hz), 133.1 (d,  $J = 1.8$  Hz), 131.1, 128.1, 127.8, 125.3, 120.9 (d,  $J = 2.6$  Hz), 117.6 (d,  $J = 2.9$  Hz), 111.7, 100.5 (d,  $J = 8.2$  Hz), 87.8, 74.1 (d,  $J = 7.8$  Hz), 23.8 (d,  $J = 4.3$  Hz), 23.5 (d,  $J = 5.3$  Hz). <sup>31</sup>P NMR (162 MHz, CDCl<sub>3</sub>)  $\delta$  17.94 (t,  $J = 8.2$  Hz). HRMS (GC/QTOF)  $m/z$ : [M]<sup>+</sup> calcd for C<sub>20</sub>H<sub>24</sub>NO<sub>3</sub>PS, 389.1215; found 389.1205.

#### O,O-Dimethyl S-(2-phenylindolizin-3-yl) phosphorodithioate (5a)

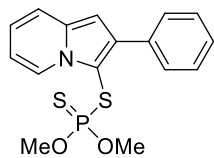

Preparative TLC on silica gel (eluent: PE/EA = 3/1, v/v) to afford **5a**. Green liquid (69.1 mg, 66%). <sup>1</sup>H NMR (400 MHz, CDCl<sub>3</sub>)  $\delta$  8.49 (d,  $J = 7.1$  Hz, 1H), 7.60 (d,  $J = 7.4$  Hz, 3H), 7.52 – 7.46 (m, 3H), 7.40 (t,  $J = 7.3$  Hz, 1H), 6.99 (t,  $J = 7.8$  Hz, 1H), 6.78 (t,  $J = 6.8$  Hz, 1H), 3.34 (s, 3H), 3.31 (s, 3H). <sup>13</sup>C NMR (101 MHz, CDCl<sub>3</sub>)  $\delta$  134.3, 133.0, 131.5, 131.0, 128.2, 128.0, 124.6, 123.8 (d,  $J = 256.0$  Hz), 121.1, 117.8 (d,  $J = 2.8$  Hz), 112.2, 87.9, 54.2 (d,  $J = 6.5$  Hz), 53.8 (d,  $J = 5.9$  Hz). <sup>31</sup>P NMR (162 MHz, CDCl<sub>3</sub>)  $\delta$  22.84 – 22.53 (m). HRMS (GC/QTOF)  $m/z$ : [M]<sup>+</sup> calcd for C<sub>16</sub>H<sub>16</sub>NO<sub>2</sub>PS<sub>2</sub>, 349.0360; found 349.0363.

#### O,O-Dimethyl S-(2-(p-tolyl)indolizin-3-yl) phosphorodithioate (5b)

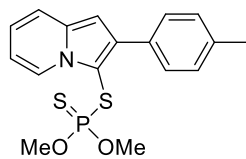

Preparative TLC on silica gel (eluent: PE/EA = 3/1, v/v) to afford **5b**. Green liquid (74.1 mg, 68%). <sup>1</sup>H NMR (400 MHz, CDCl<sub>3</sub>)  $\delta$  8.48 (d,  $J = 7.1$  Hz, 1H), 7.49 (d,  $J = 7.7$  Hz, 3H), 7.30 (d,  $J = 7.8$  Hz, 3H), 6.99 (t, 1H), 6.77 (t,  $J = 6.9$  Hz, 1H), 3.37 (s,

3H), 3.34 (s, 3H), 2.42 (s, 3H).  $^{13}\text{C}$  NMR (101 MHz,  $\text{CDCl}_3$ )  $\delta$  137.8, 135.8 (d,  $J = 4.7$  Hz), 134.3 (d,  $J = 2.9$  Hz), 130.9, 130.0, 129.1, 129.0, 124.6, 121.0, 117.8, 112.1, 88.0, 54.2, 21.5.  $^{31}\text{P}$  NMR (162 MHz,  $\text{CDCl}_3$ )  $\delta$  22.84 – 22.53 (m). HRMS (GC/QTOF)  $m/z$ :  $[\text{M}]^+$  calcd for  $\text{C}_{17}\text{H}_{18}\text{NO}_2\text{PS}_2$ , 363.0517; found 363.0511.

**S-(2-(4-Chlorophenyl)indolizin-3-yl) O,O-dimethyl phosphorodithioate (5c)**

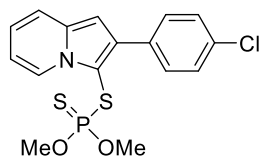

Preparative TLC on silica gel (eluent: PE/EA = 3/1, v/v) to afford **5c**. Green liquid (71.1 mg, 62%).  $^1\text{H}$  NMR (400 MHz,  $\text{CDCl}_3$ )  $\delta$  8.47 (d,  $J = 6.4$  Hz, 1H), 7.55 (d,  $J = 8.5$  Hz, 2H), 7.48 (t,  $J = 7.1$  Hz, 3H), 7.01 (t,  $J = 7.8$  Hz, 1H), 6.79 (t,  $J = 6.8$  Hz, 2H), 3.43 (s, 3H), 3.40 (s, 3H).  $^{13}\text{C}$  NMR (101 MHz,  $\text{CDCl}_3$ )  $\delta$  134.4 (d,  $J = 3.1$  Hz), 134.1, 132.3, 131.5 (d,  $J = 1.4$  Hz), 128.5, 128.3 (d,  $J = 14.3$  Hz), 124.6, 121.3 (d,  $J = 2.6$  Hz), 117.9 (d,  $J = 2.8$  Hz), 112.4, 99.0 (d,  $J = 5.4$  Hz), 87.9 (d,  $J = 1.8$  Hz), 54.3 (d,  $J = 7.0$  Hz).  $^{31}\text{P}$  NMR (162 MHz,  $\text{CDCl}_3$ )  $\delta$  22.62 – 22.32 (m). HRMS (GC/QTOF)  $m/z$ :  $[\text{M}]^+$  calcd for  $\text{C}_{16}\text{H}_{15}\text{ClNO}_2\text{PS}_2$ , 382.9970; found 382.9972.

**S-(2-(4-Bromophenyl)indolizin-3-yl) O,O-dimethyl phosphorodithioate (5d)**

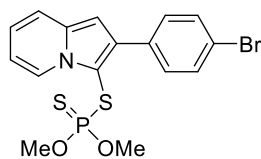

Preparative TLC on silica gel (eluent: PE/EA = 3/1, v/v) to afford **5d**. Green liquid (80.5 mg, 63%).  $^1\text{H}$  NMR (400 MHz,  $\text{CDCl}_3$ )  $\delta$  8.47 (d,  $J = 7.0$  Hz, 1H), 7.63 (d,  $J = 8.4$  Hz, 2H), 7.49 (d,  $J = 8.6$  Hz, 4H), 7.00 (t,  $J = 8.2$  Hz, 1H), 6.79 (t,  $J = 6.9$  Hz, 1H), 3.43 (s, 3H), 3.40 (s, 3H).  $^{13}\text{C}$  NMR (101 MHz,  $\text{CDCl}_3$ )  $\delta$  134.5 (d,  $J = 4.8$  Hz), 134.4 (d,  $J = 3.1$  Hz), 132.6, 132.0 (d,  $J = 1.4$  Hz), 131.5, 124.6, 122.3, 121.3 (d,  $J = 2.7$  Hz), 117.9 (d,  $J = 2.8$  Hz), 112.5, 99.0 (d,  $J = 8.3$  Hz), 87.8 (d,  $J = 1.8$  Hz), 54.3 (d,  $J = 6.7$  Hz).  $^{31}\text{P}$  NMR (162 MHz,  $\text{CDCl}_3$ )  $\delta$  22.62 – 22.31 (m). HRMS (GC/QTOF)  $m/z$ :  $[\text{M}]^+$  calcd for  $\text{C}_{16}\text{H}_{15}\text{BrNO}_2\text{PS}_2$ , 426.9465; found 426.9463.

**S-(2-(3-Chlorophenyl)indolizin-3-yl) O,O-dimethyl phosphorodithioate (5e)**

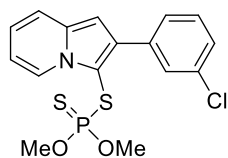

Preparative TLC on silica gel (eluent: PE/EA = 3/1, v/v) to afford **5e**. Green liquid (68.8 mg, 60%).  $^1\text{H}$  NMR (400 MHz,  $\text{CDCl}_3$ )  $\delta$  8.47 (d,  $J = 7.1$  Hz, 1H), 7.62 (s, 1H), 7.49 (d,  $J = 9.2$  Hz, 3H), 7.47 – 7.35 (m, 2H), 7.01 (t,  $J = 7.9$  Hz, 1H), 6.79 (t,  $J = 6.8$  Hz, 1H), 3.45 (s, 3H), 3.42 (s, 3H).  $^{13}\text{C}$  NMR (101 MHz,  $\text{CDCl}_3$ )  $\delta$  134.8 (d,  $J = 1.4$  Hz), 134.2 (d,  $J = 3.3$  Hz), 134.2, 133.9, 130.8, 129.4, 129.1, 127.9, 124.5, 121.2 (d,  $J = 2.5$  Hz), 117.8 (d,  $J = 2.8$  Hz), 112.4, 99.2 (d,  $J = 7.8$  Hz), 87.7 (d,  $J = 1.7$  Hz), 54.2 (d,  $J = 6.7$  Hz).  $^{31}\text{P}$  NMR (162 MHz,  $\text{CDCl}_3$ )  $\delta$  22.64 – 22.34 (m). HRMS (GC/QTOF)  $m/z$ :  $[\text{M}]^+$  calcd for  $\text{C}_{16}\text{H}_{15}\text{ClNO}_2\text{PS}_2$ , 382.9970; found 382.9978.

### 3. NMR spectra for new compounds

$^1\text{H}$  NMR (400 MHz,  $\text{CDCl}_3$ ),  $^{13}\text{C}$  NMR (100 MHz,  $\text{CDCl}_3$ ), and  $^{31}\text{P}$  NMR (162 MHz,  $\text{CDCl}_3$ ) spectrum of compound **3a**

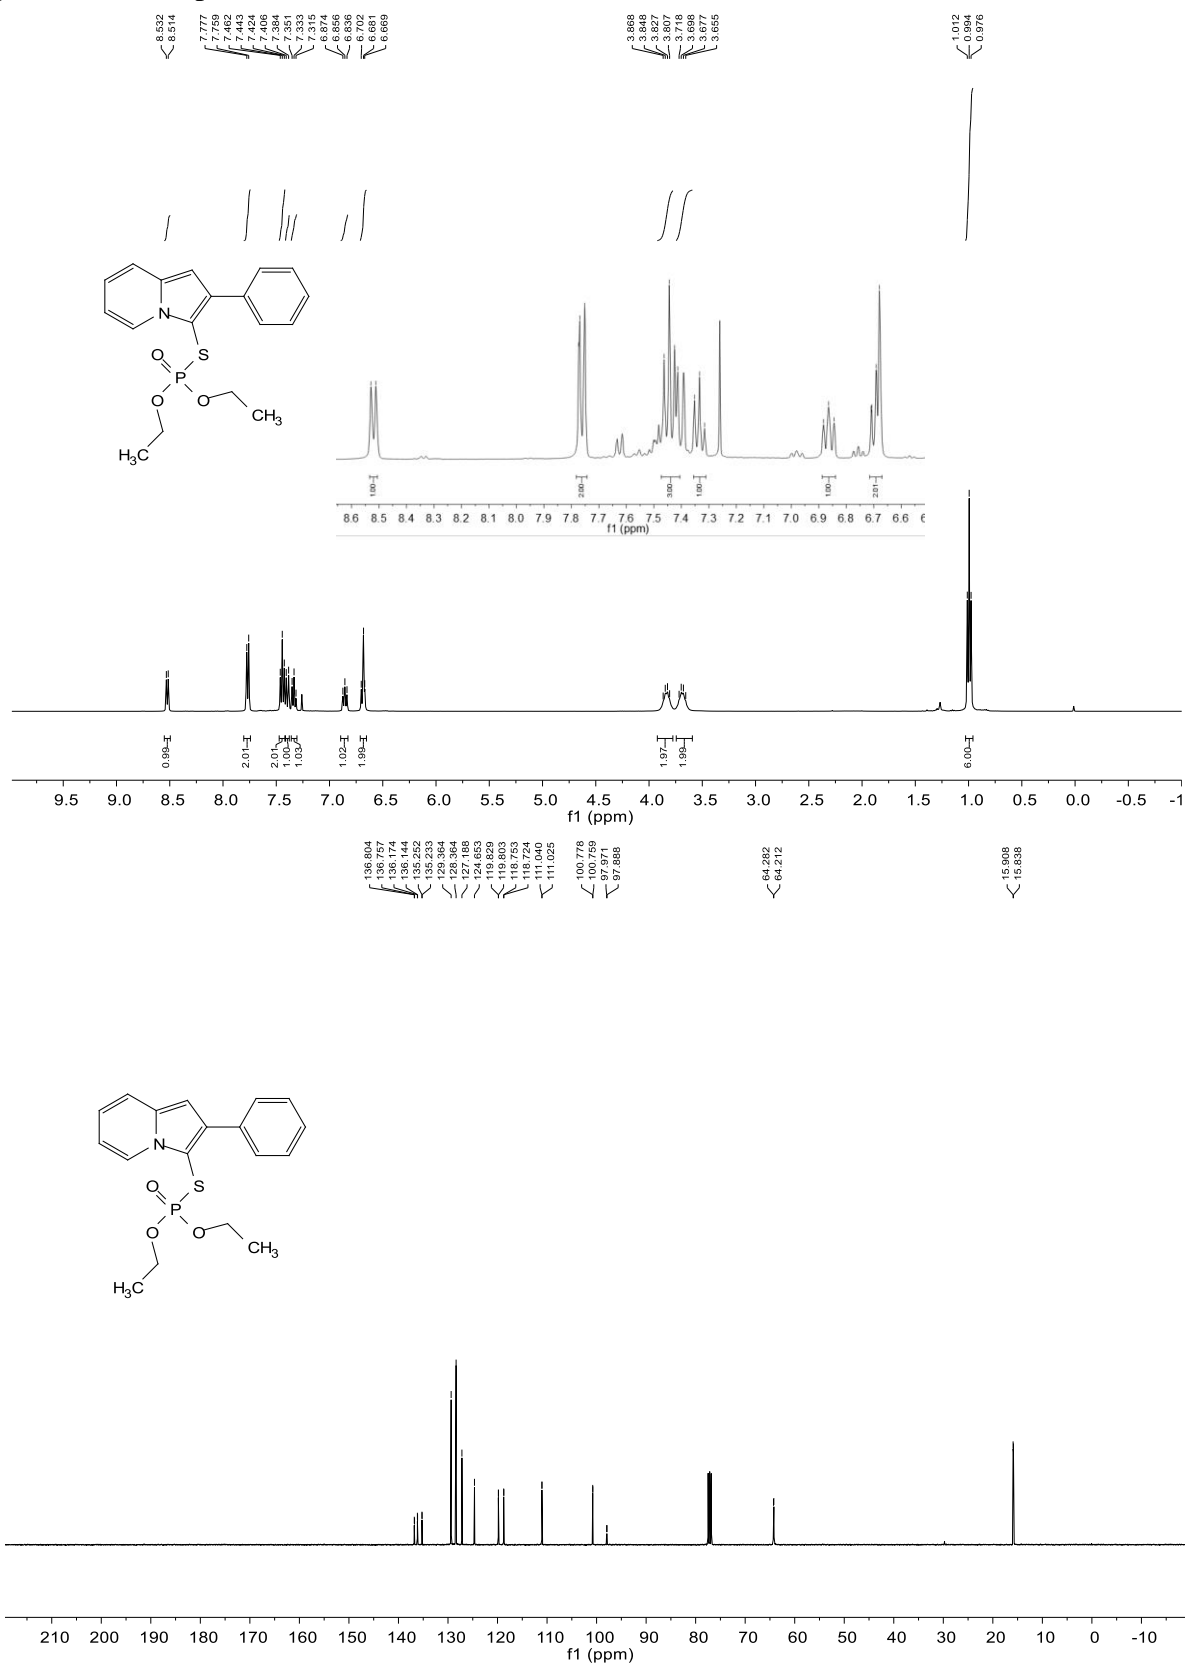

19.847  
19.798  
19.748  
19.699  
19.647

-224.525

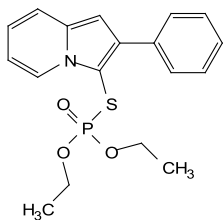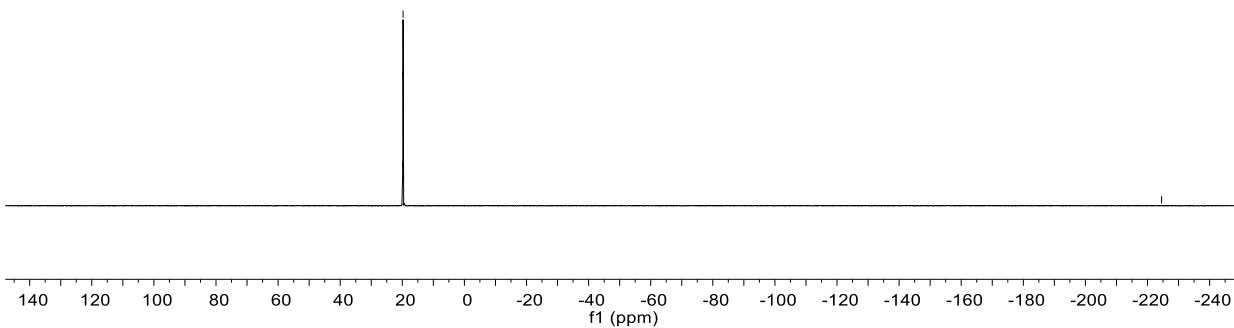

$^1\text{H}$  NMR (400 MHz,  $\text{CDCl}_3$ ),  $^{13}\text{C}$  NMR (100 MHz,  $\text{CDCl}_3$ ) and  $^{31}\text{P}$  NMR (162 MHz,  $\text{CDCl}_3$ ) spectrum of compound **3b**

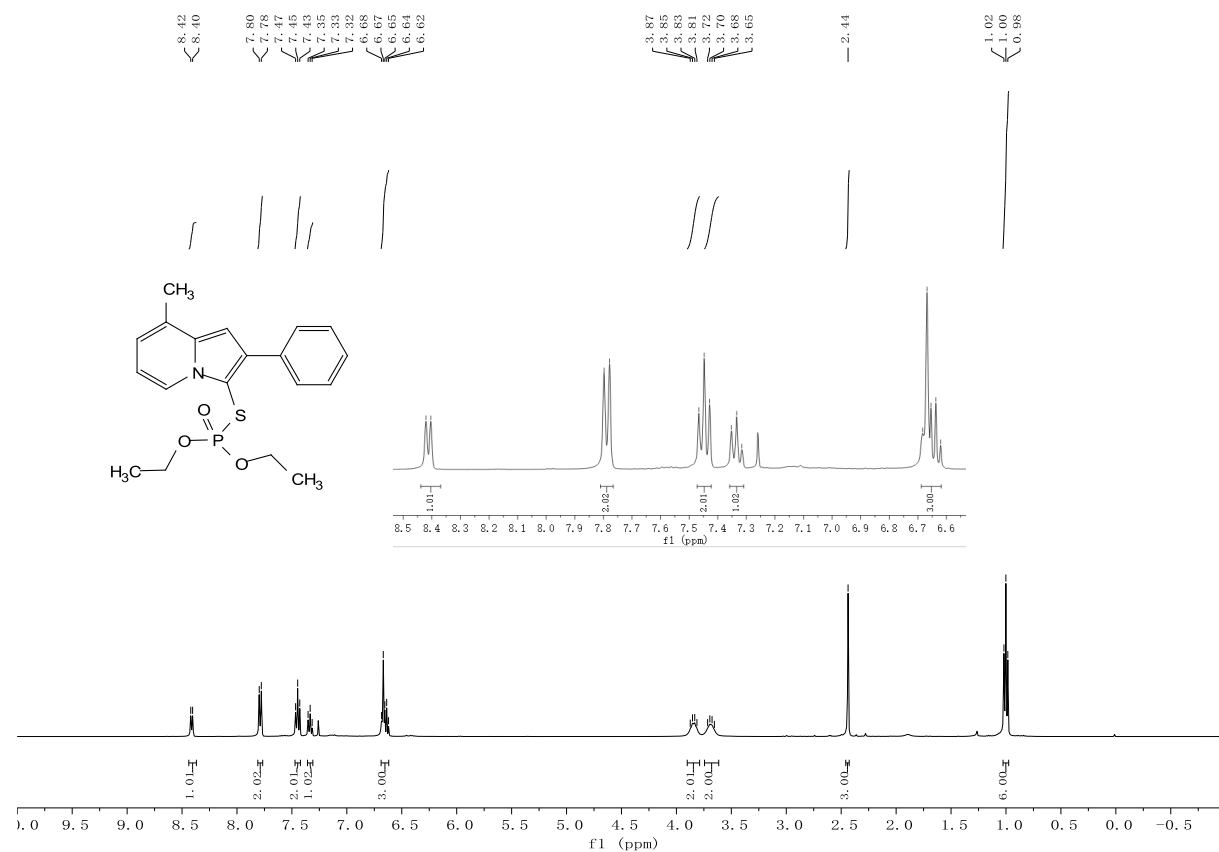



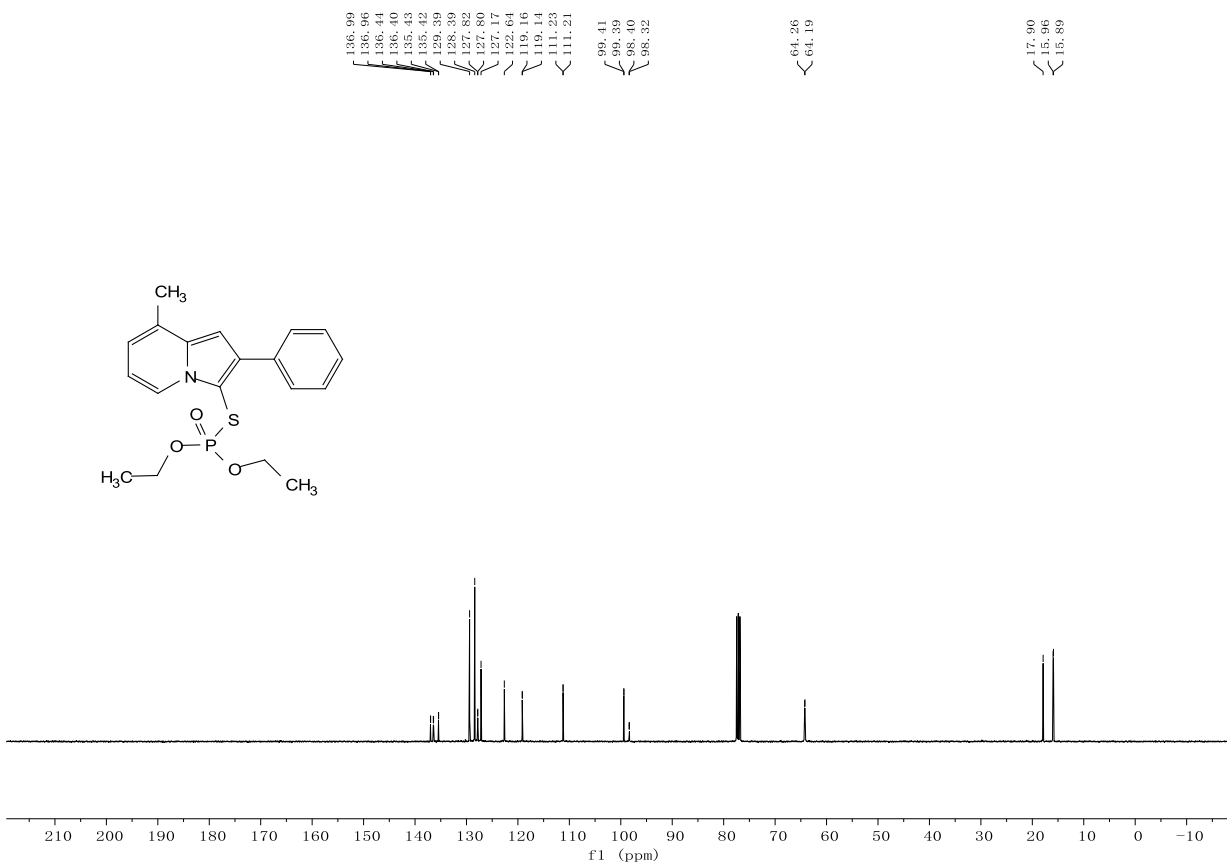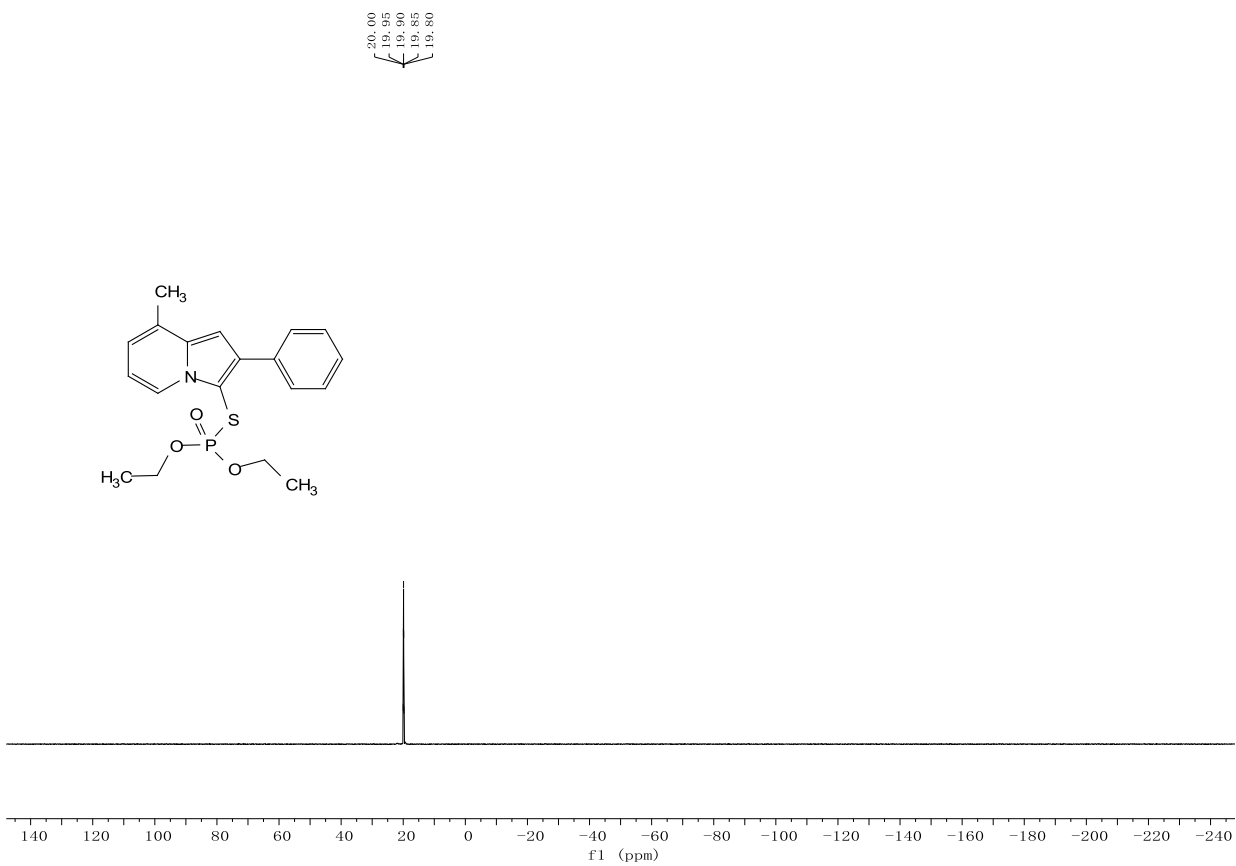

$^1\text{H}$  NMR (400 MHz,  $\text{CDCl}_3$ ),  $^{13}\text{C}$  NMR (100 MHz,  $\text{CDCl}_3$ ) and  $^{31}\text{P}$  NMR (162 MHz,  $\text{CDCl}_3$ ) spectrum of compound **3c**

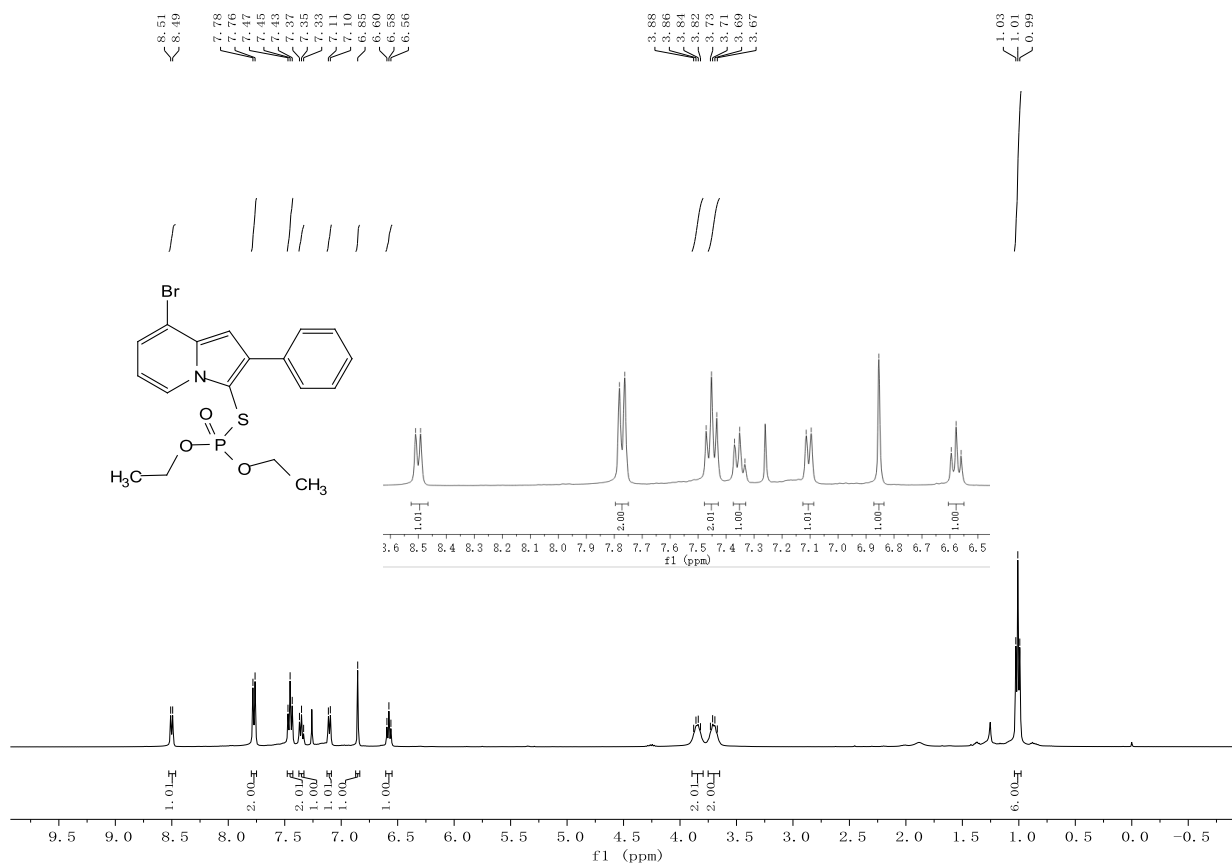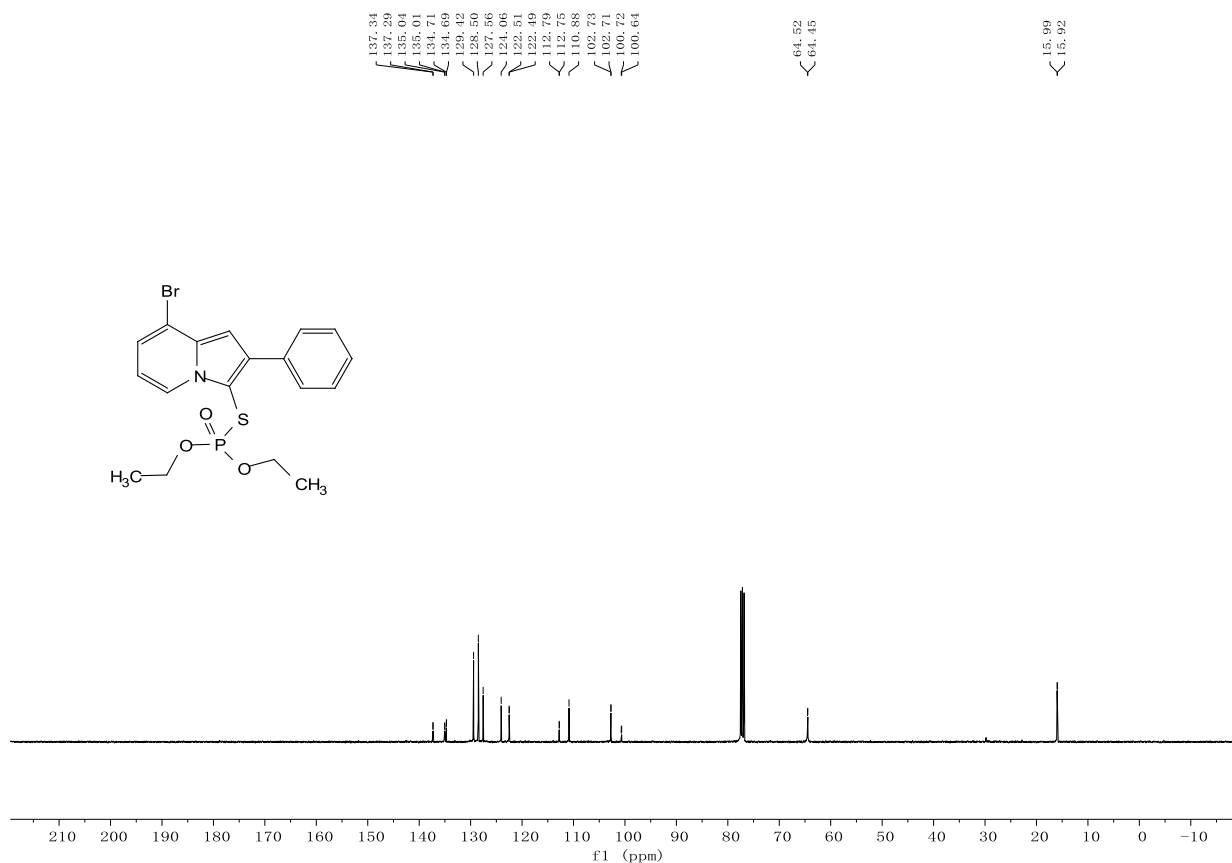

19.53  
19.49  
19.45

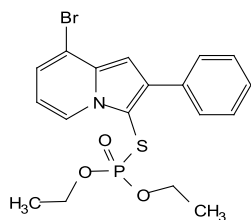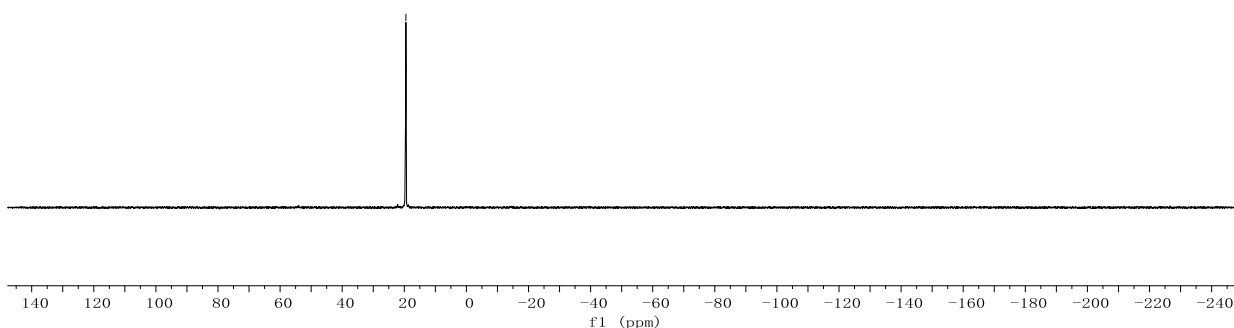

$^1\text{H}$  NMR (400 MHz,  $\text{CDCl}_3$ ),  $^{13}\text{C}$  NMR (100 MHz,  $\text{CDCl}_3$ ) and  $^{31}\text{P}$  NMR (162 MHz,  $\text{CDCl}_3$ ) spectrum of compound **3d**

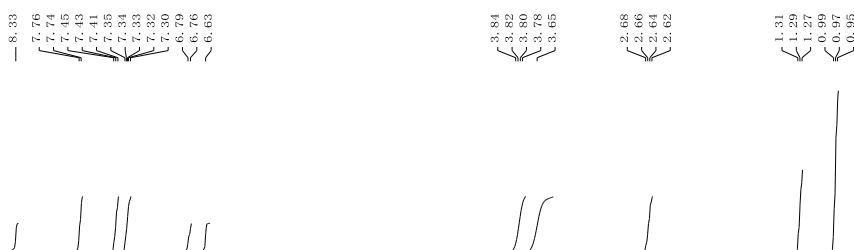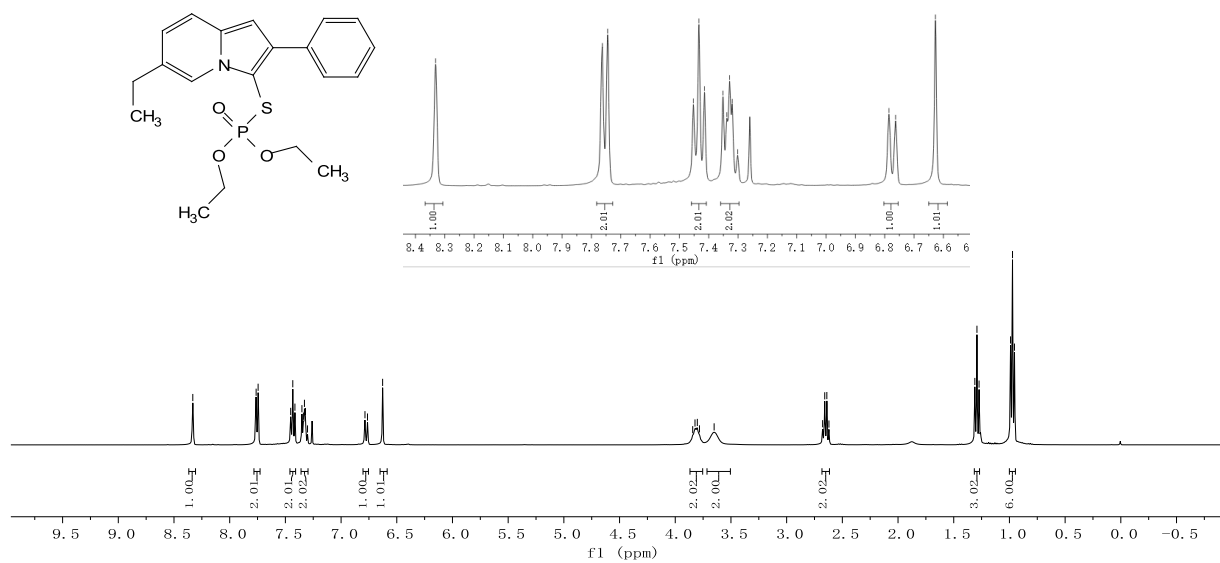

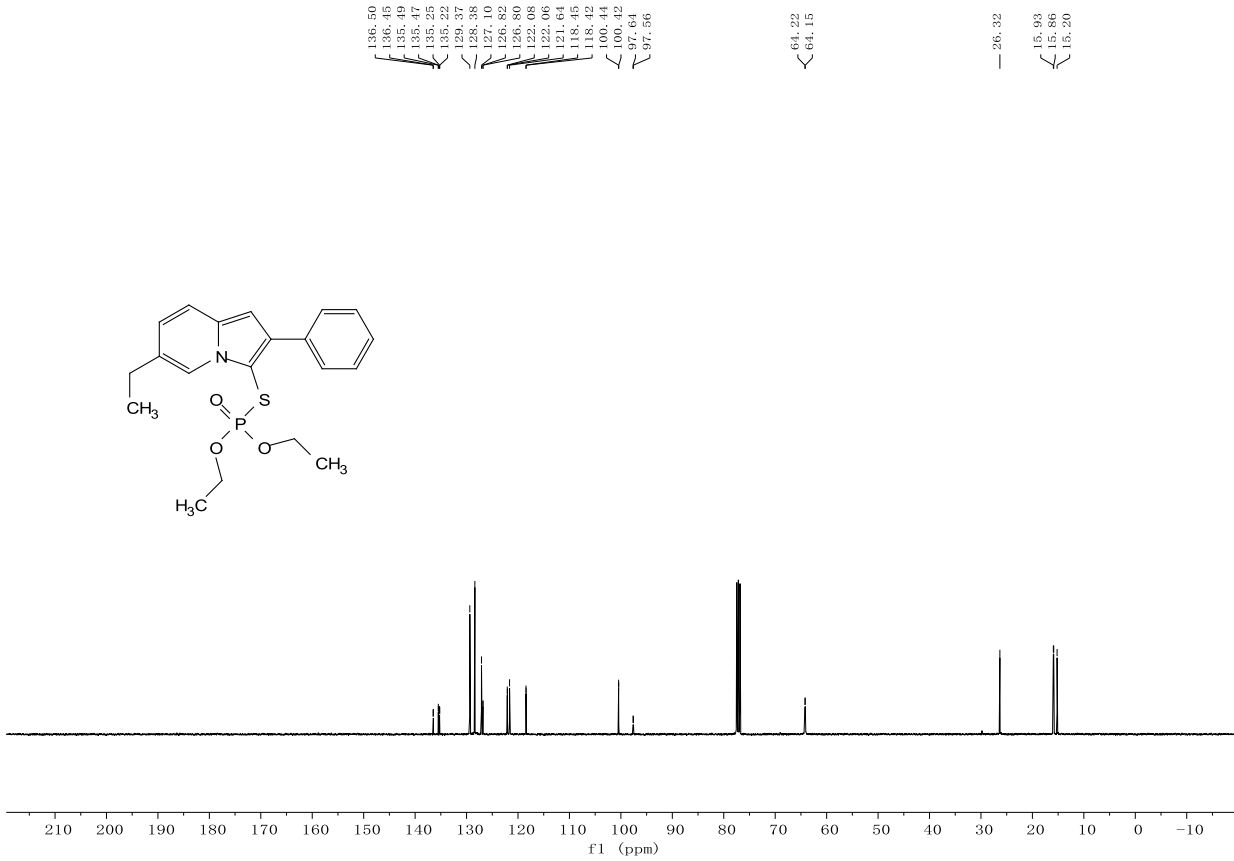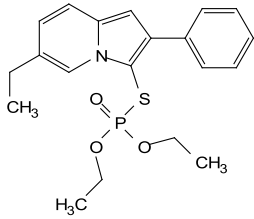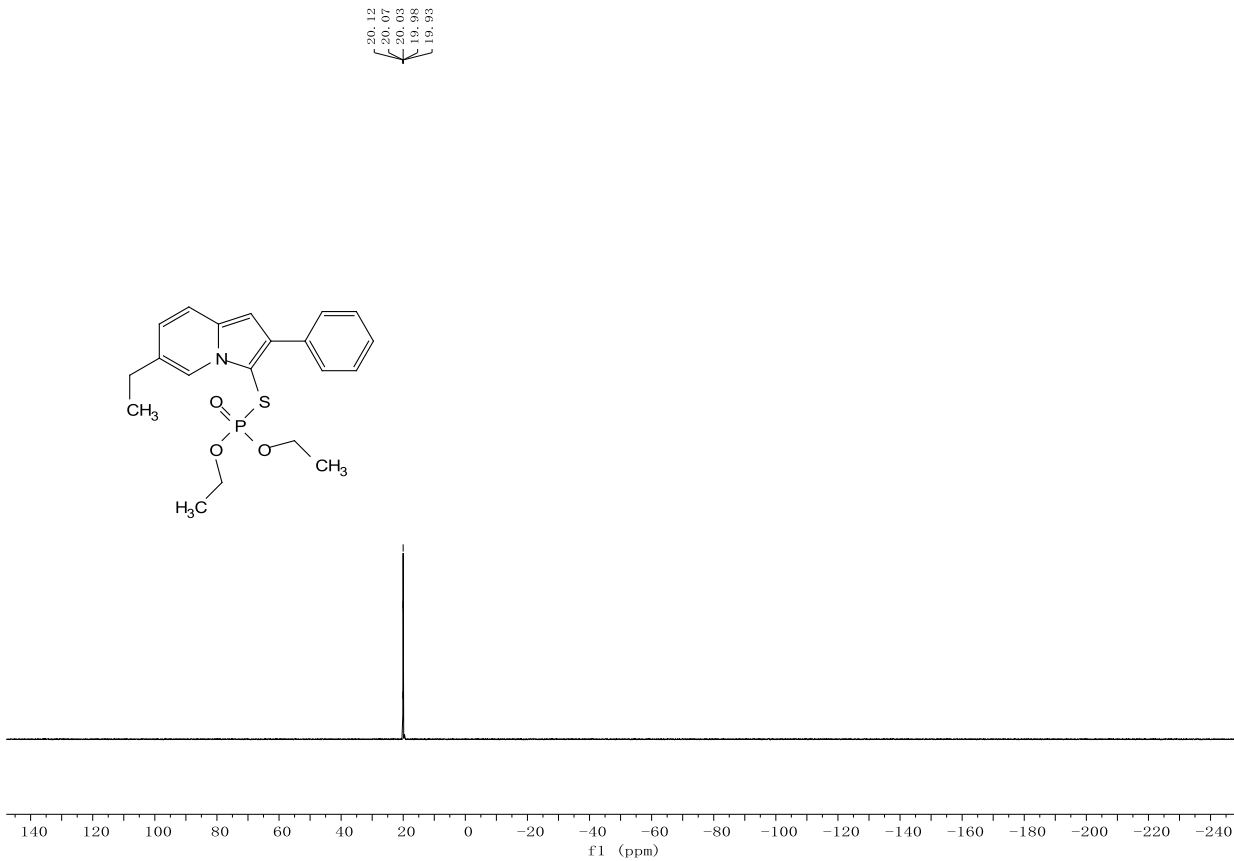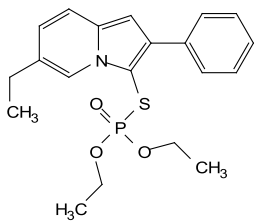

$^1\text{H}$  NMR (400 MHz,  $\text{CDCl}_3$ ),  $^{13}\text{C}$  NMR (100 MHz,  $\text{CDCl}_3$ ) spectrum of compound **3e**

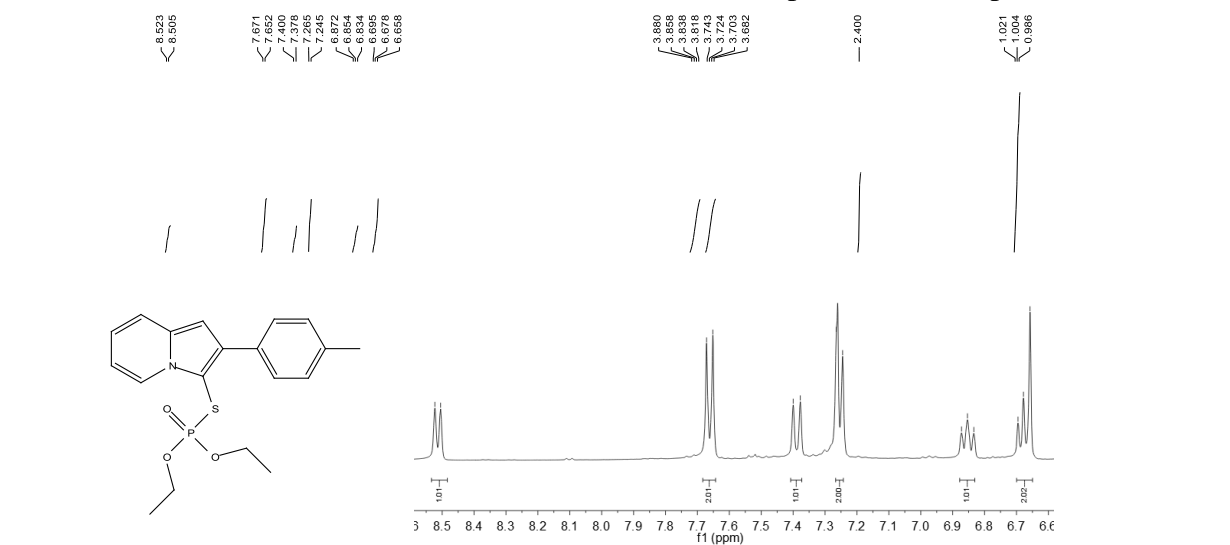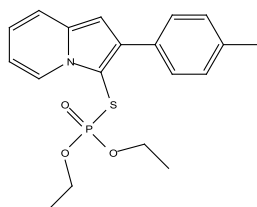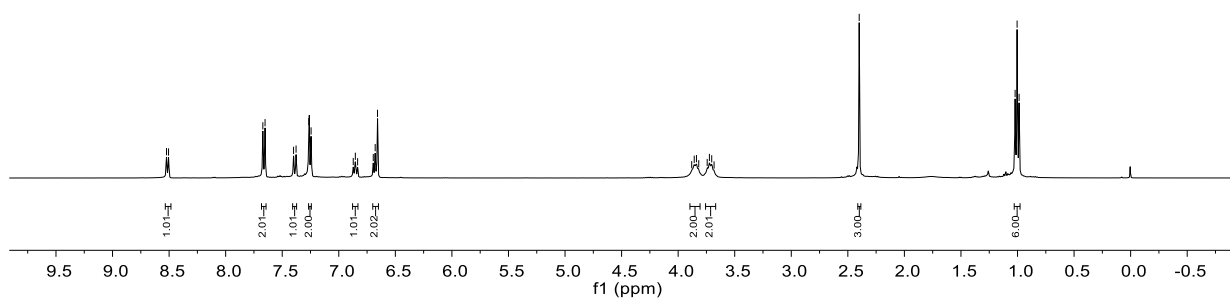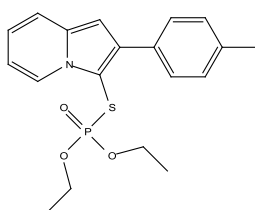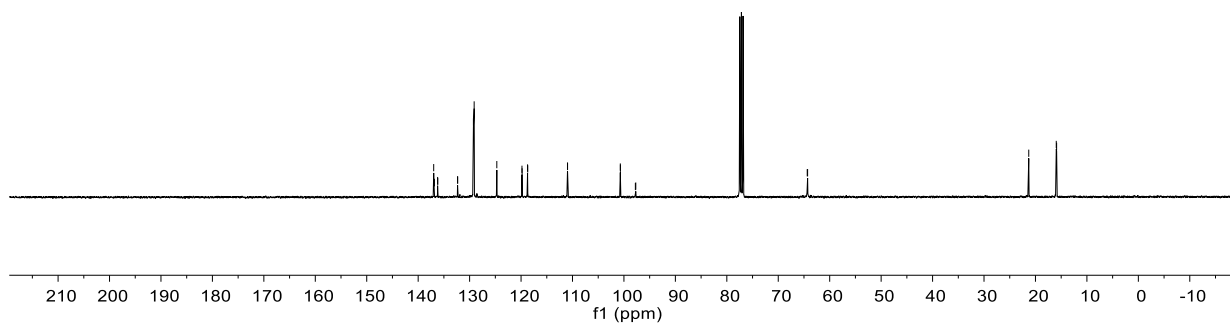

$^1\text{H}$  NMR (400 MHz,  $\text{CDCl}_3$ ),  $^{13}\text{C}$  NMR (100 MHz,  $\text{CDCl}_3$ ) and  $^{31}\text{P}$  NMR (162 MHz,  $\text{CDCl}_3$ ) spectrum of compound **3f**

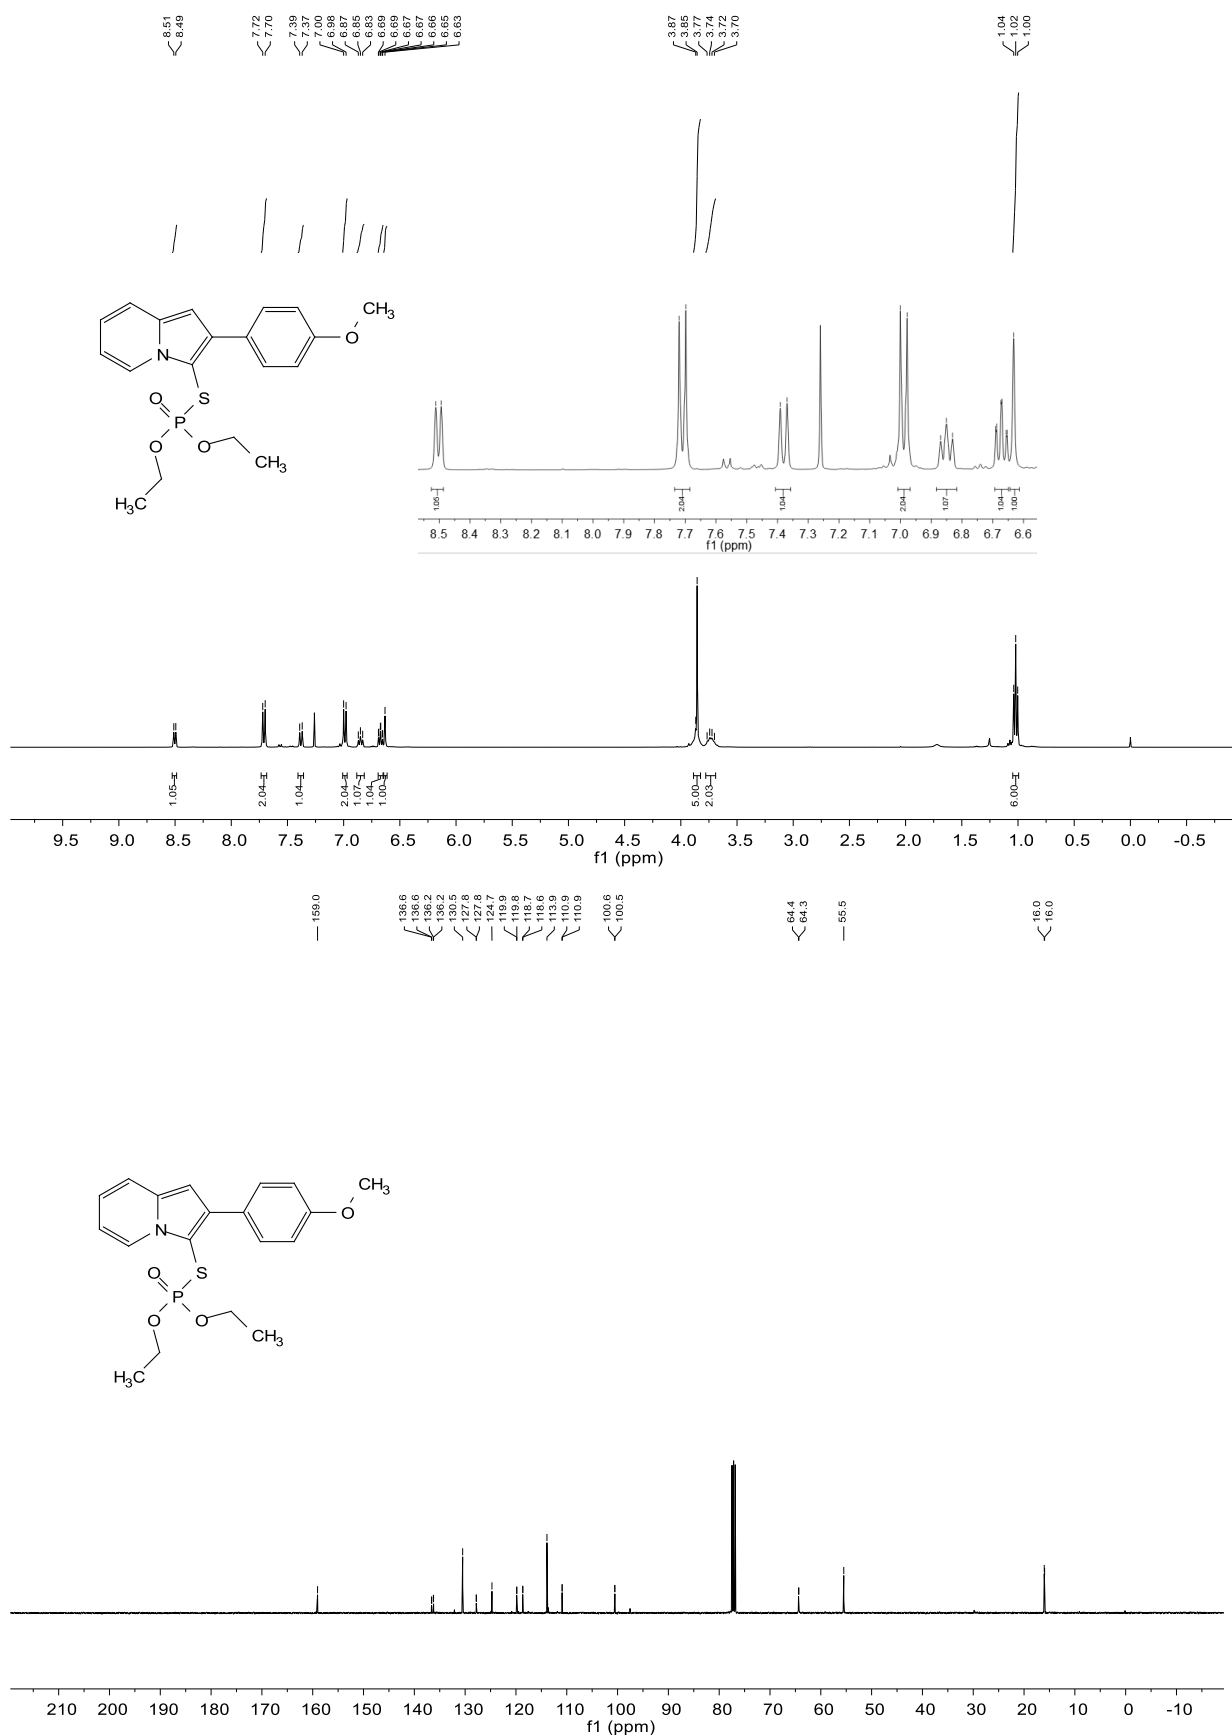

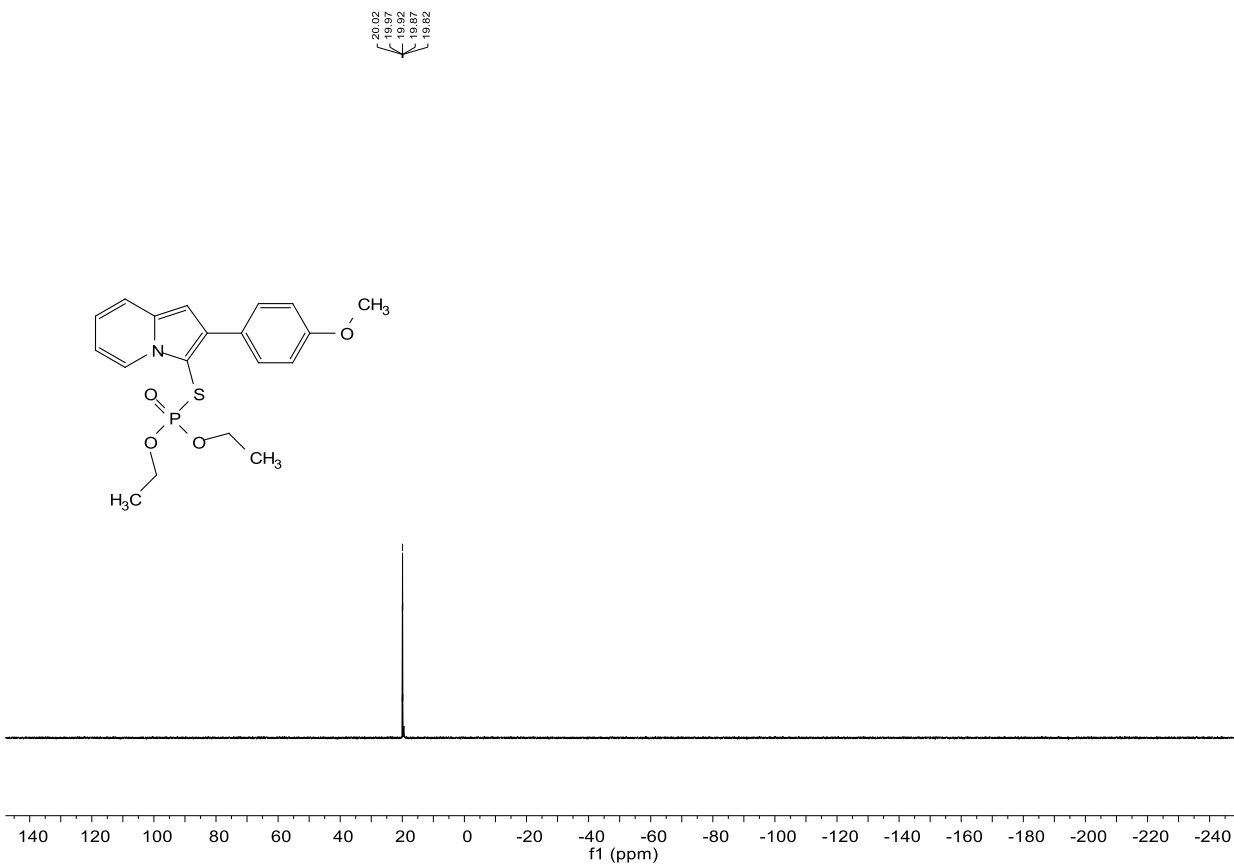

$^1\text{H}$  NMR (400 MHz,  $\text{CDCl}_3$ ),  $^{13}\text{C}$  NMR (100 MHz,  $\text{CDCl}_3$ ) and  $^{31}\text{P}$  NMR (162 MHz,  $\text{CDCl}_3$ ) spectrum of compound **3g**

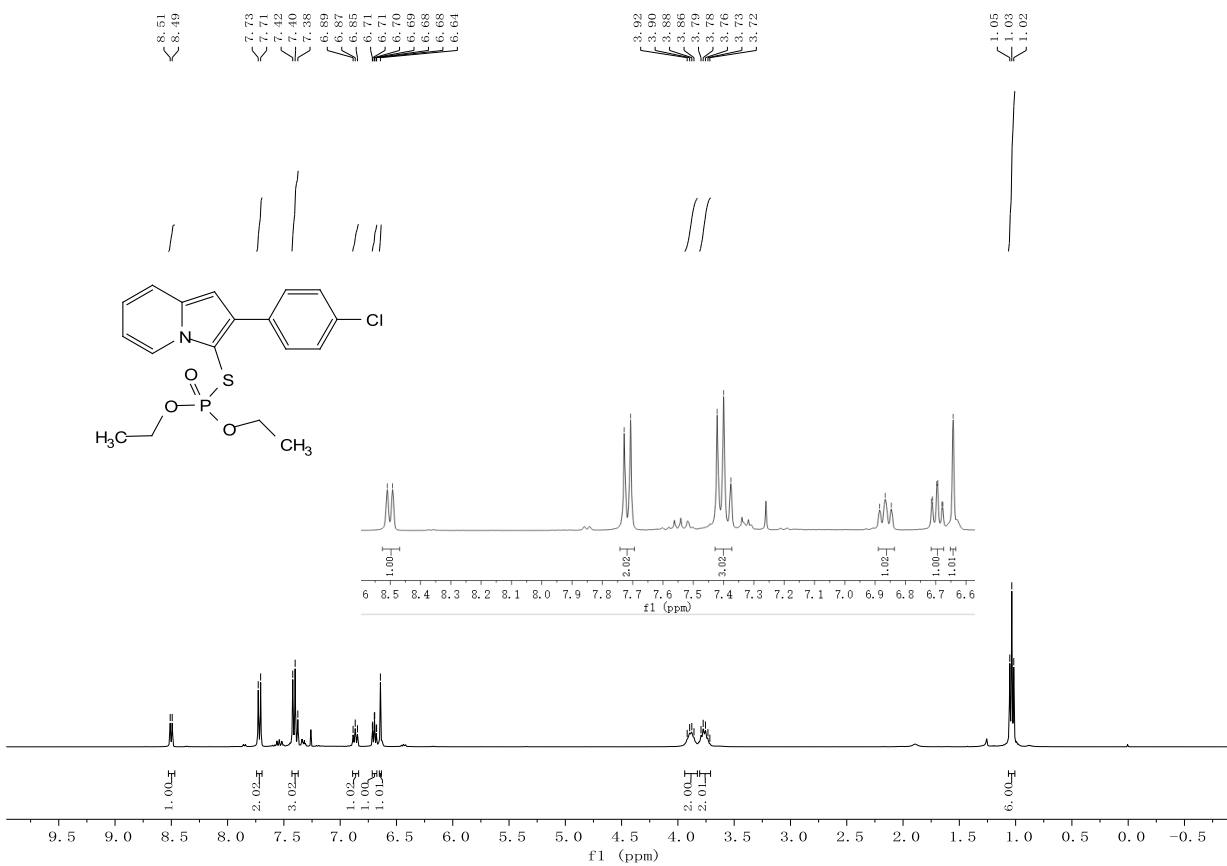

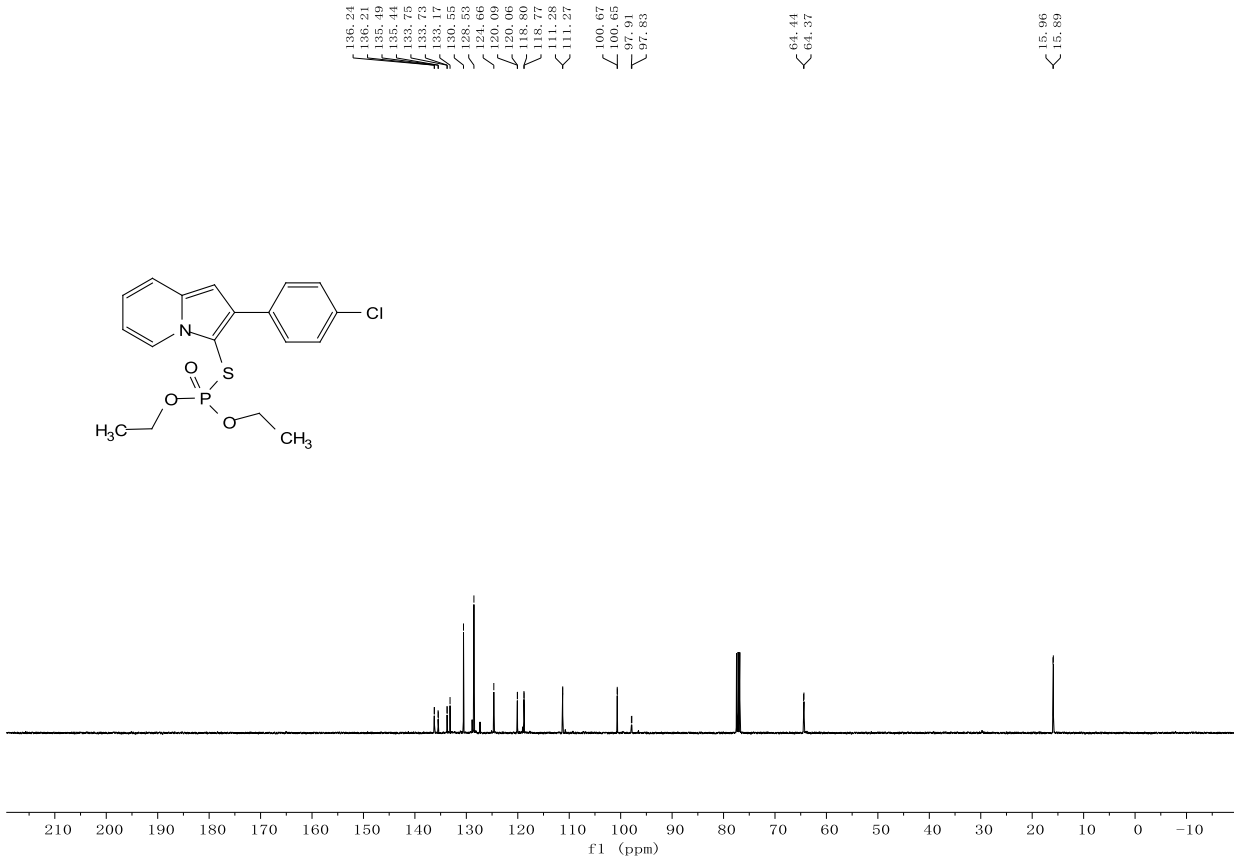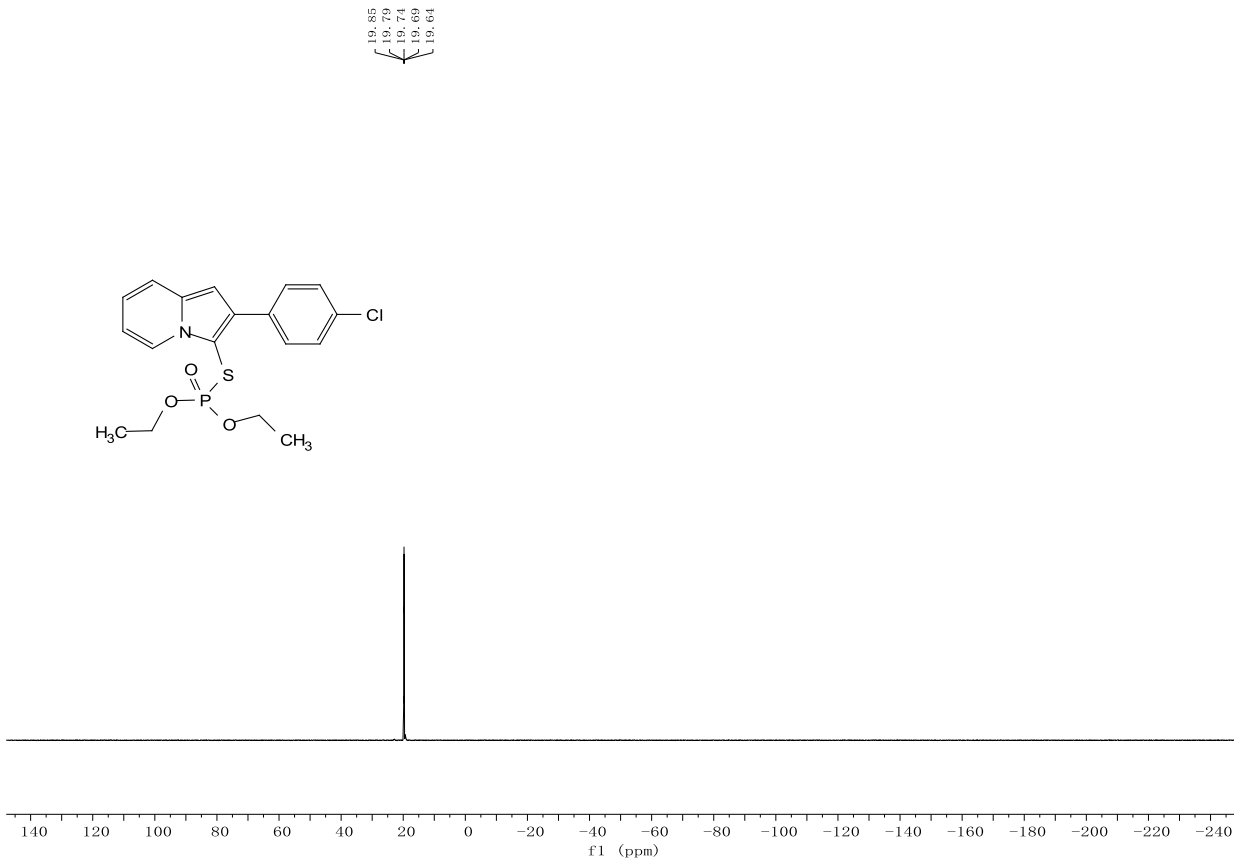



$^1\text{H}$  NMR (400 MHz,  $\text{CDCl}_3$ ),  $^{13}\text{C}$  NMR (100 MHz,  $\text{CDCl}_3$ ) and  $^{31}\text{P}$  NMR (162 MHz,  $\text{CDCl}_3$ ) spectrum of compound **3h**

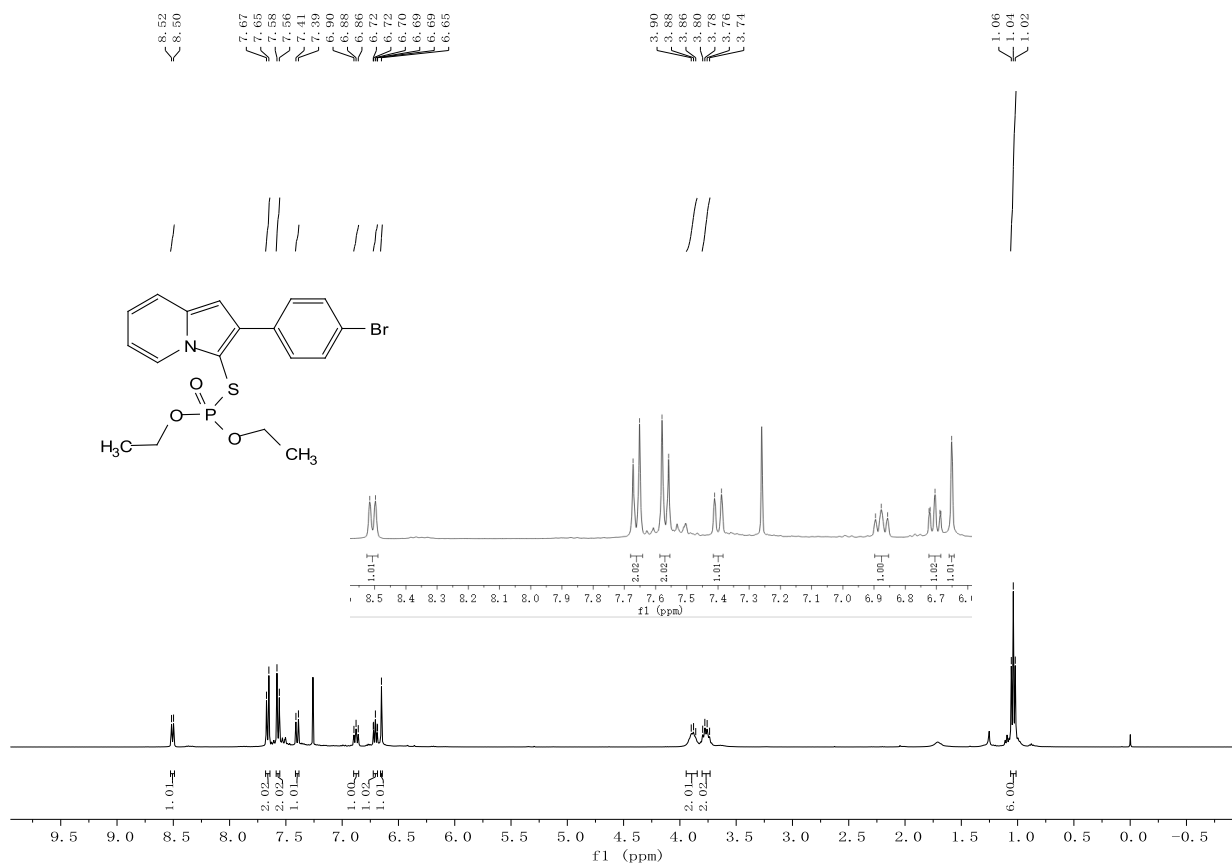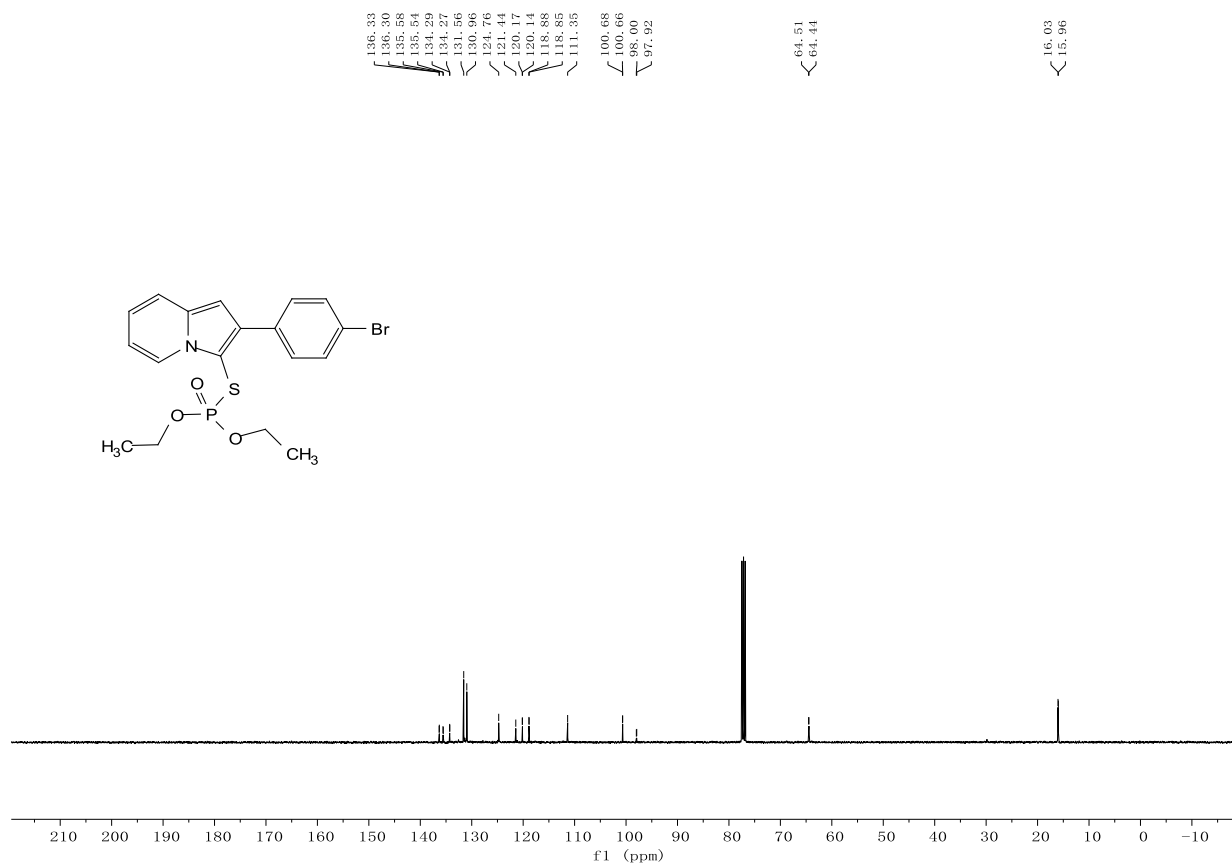

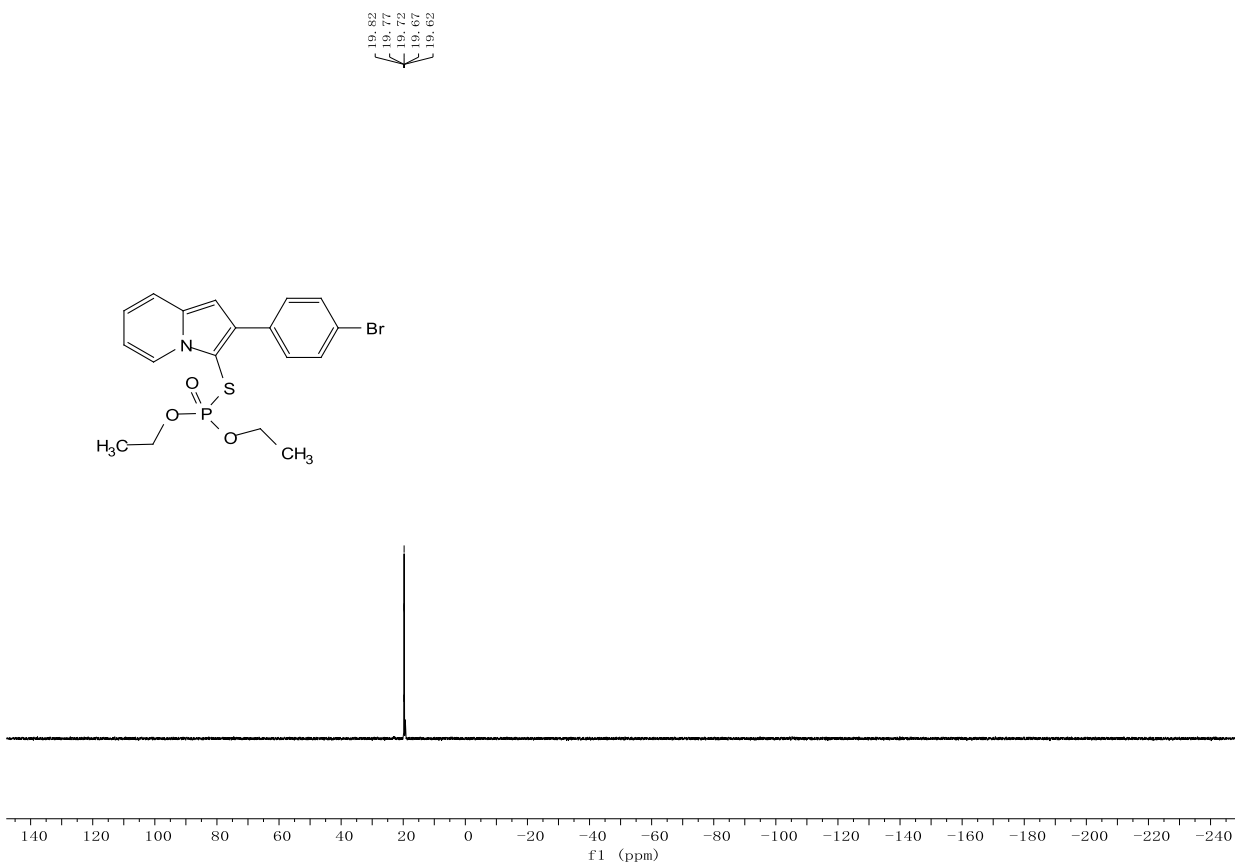

$^1\text{H}$  NMR (400 MHz,  $\text{CDCl}_3$ ),  $^{13}\text{C}$  NMR (100 MHz,  $\text{CDCl}_3$ ), and  $^{31}\text{P}$  NMR (162 MHz,  $\text{CDCl}_3$ ) spectrum of compound **3i**

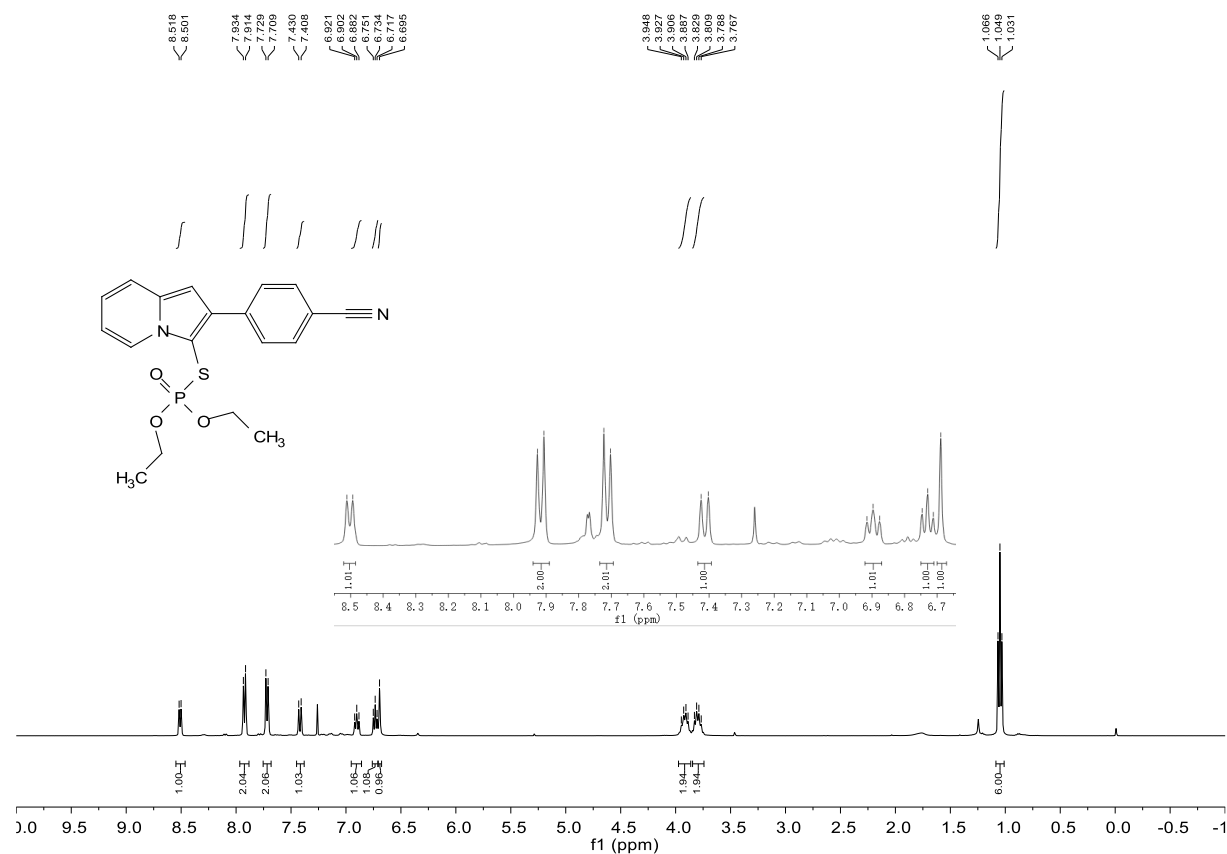

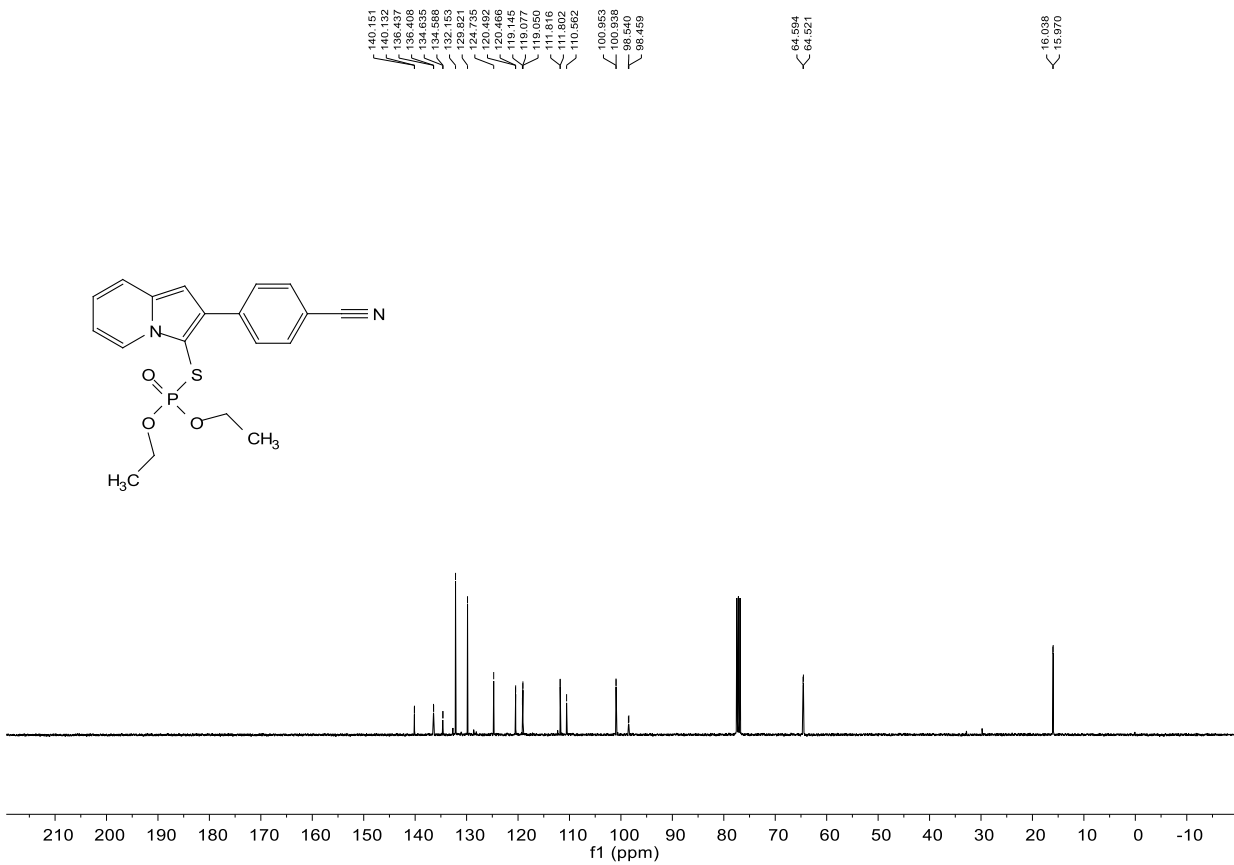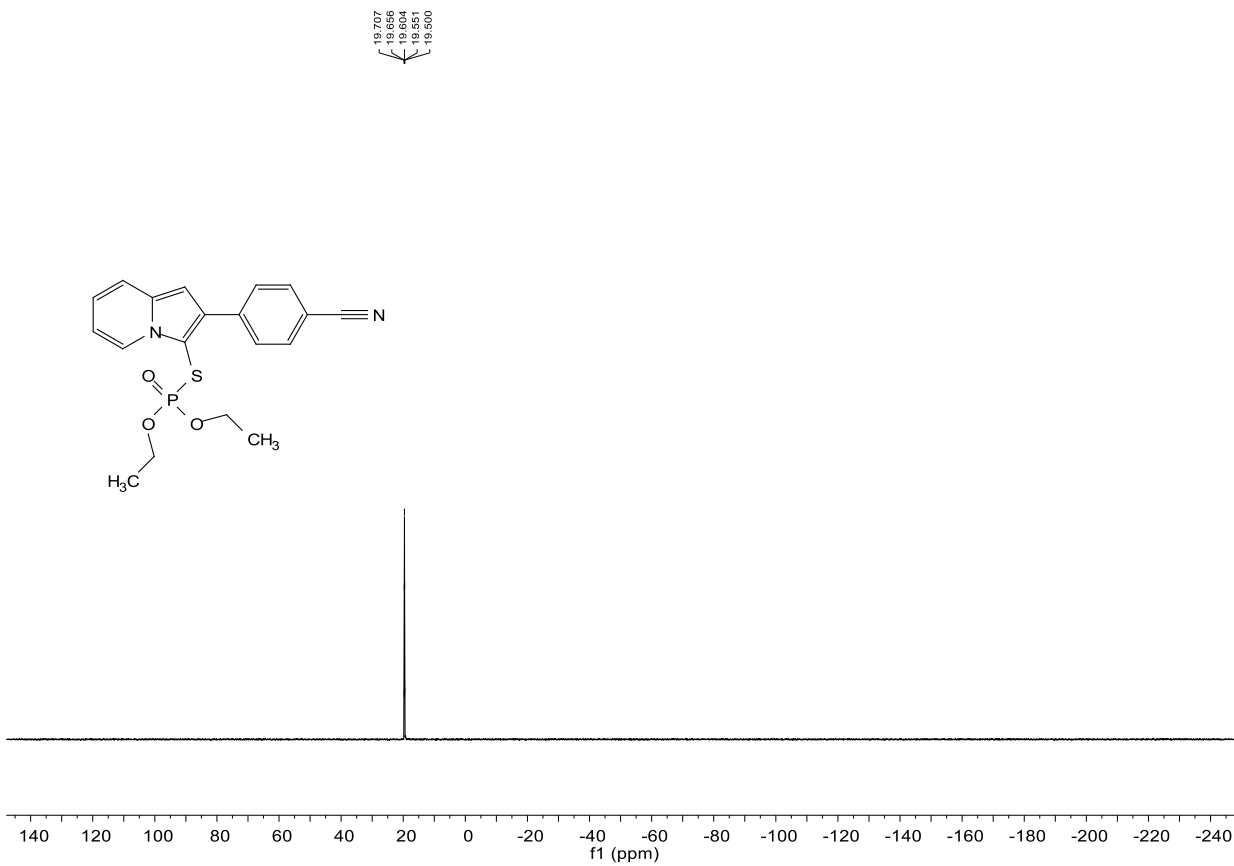

$^1\text{H}$  NMR (400 MHz,  $\text{CDCl}_3$ ),  $^{13}\text{C}$  NMR (100 MHz,  $\text{CDCl}_3$ ) and  $^{31}\text{P}$  NMR (162 MHz,  $\text{CDCl}_3$ ) spectrum of compound **3j**

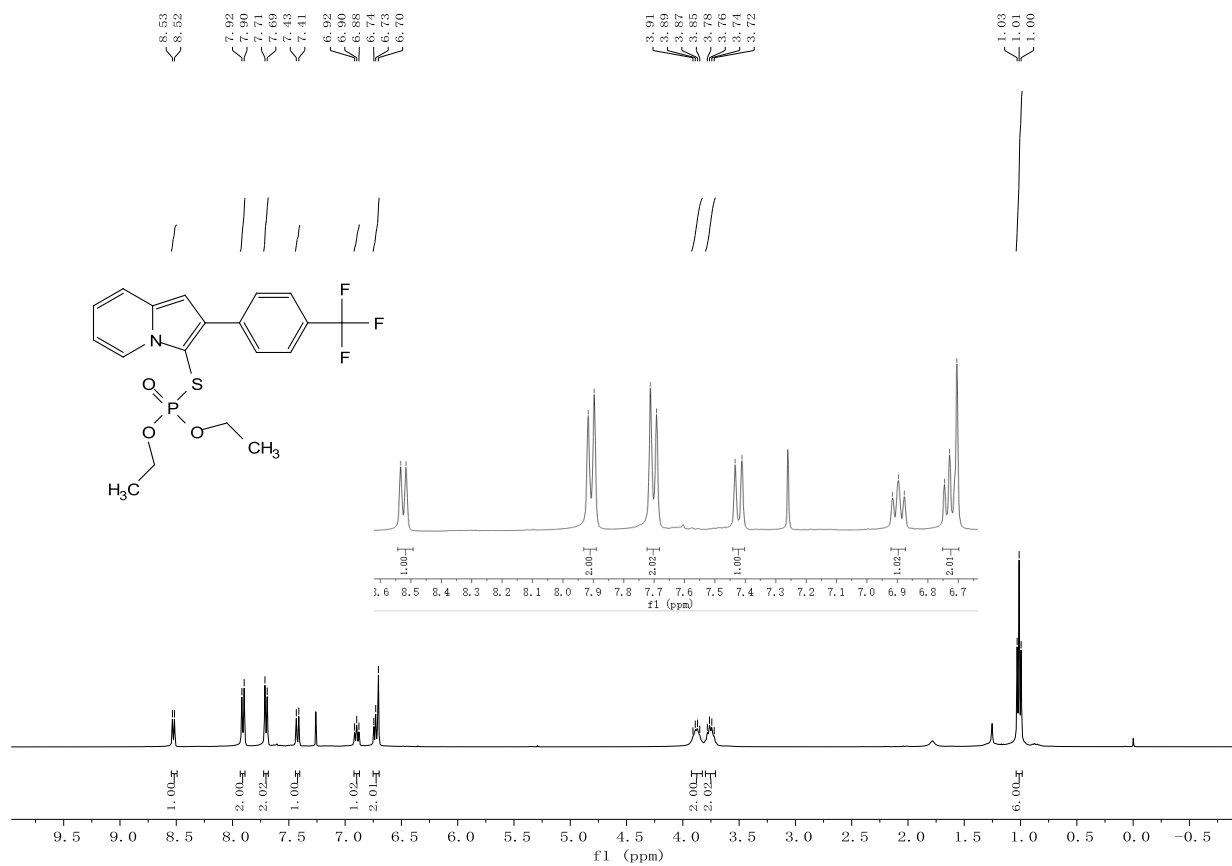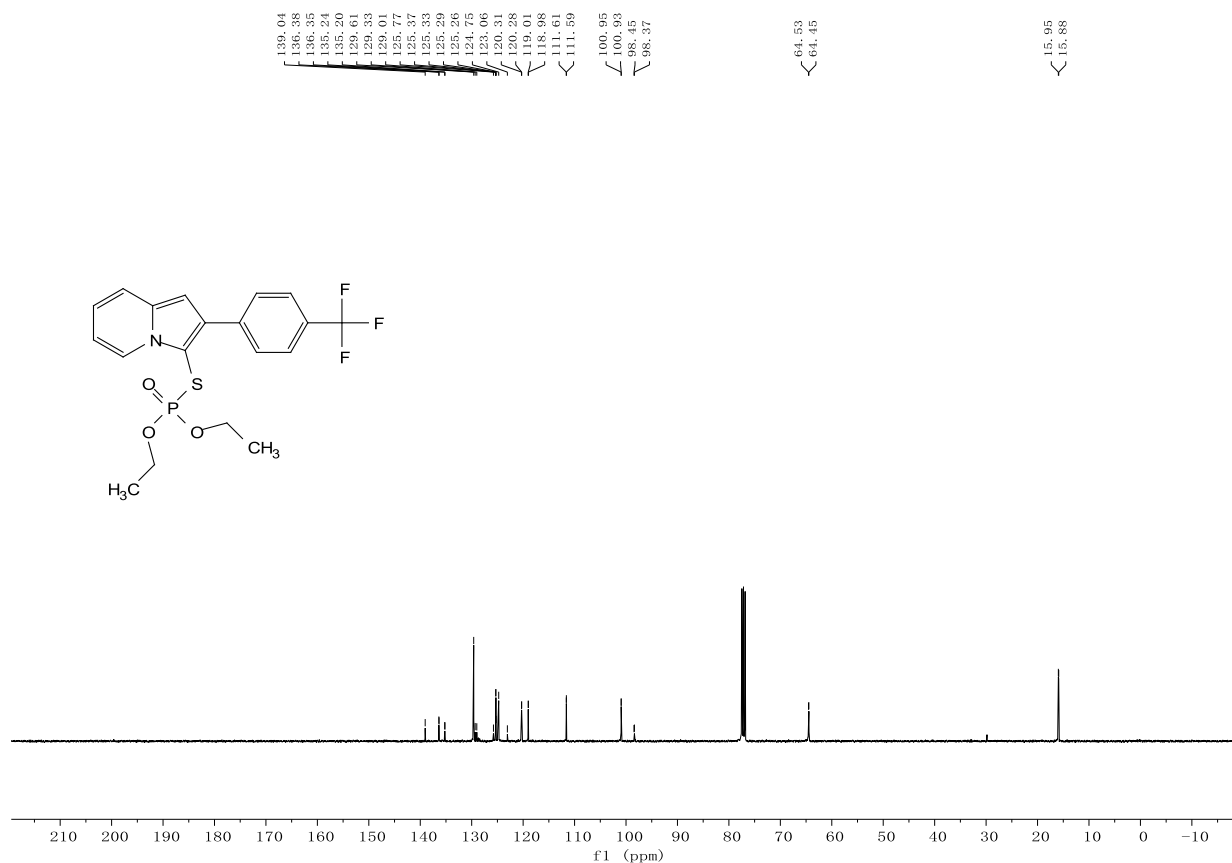

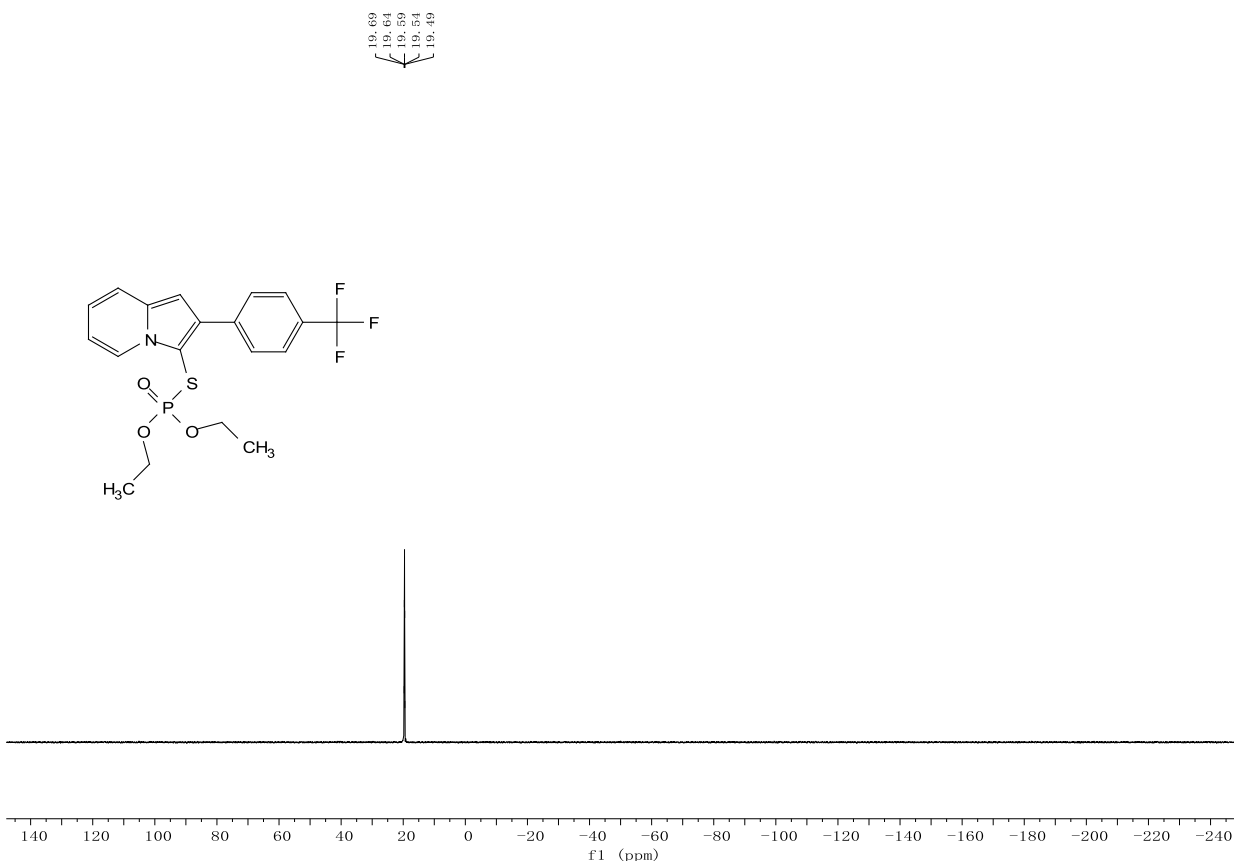

$^1\text{H}$  NMR (400 MHz,  $\text{CDCl}_3$ ),  $^{13}\text{C}$  NMR (100 MHz,  $\text{CDCl}_3$ ) and  $^{31}\text{P}$  NMR (162 MHz,  $\text{CDCl}_3$ ) spectrum of compound **3k**

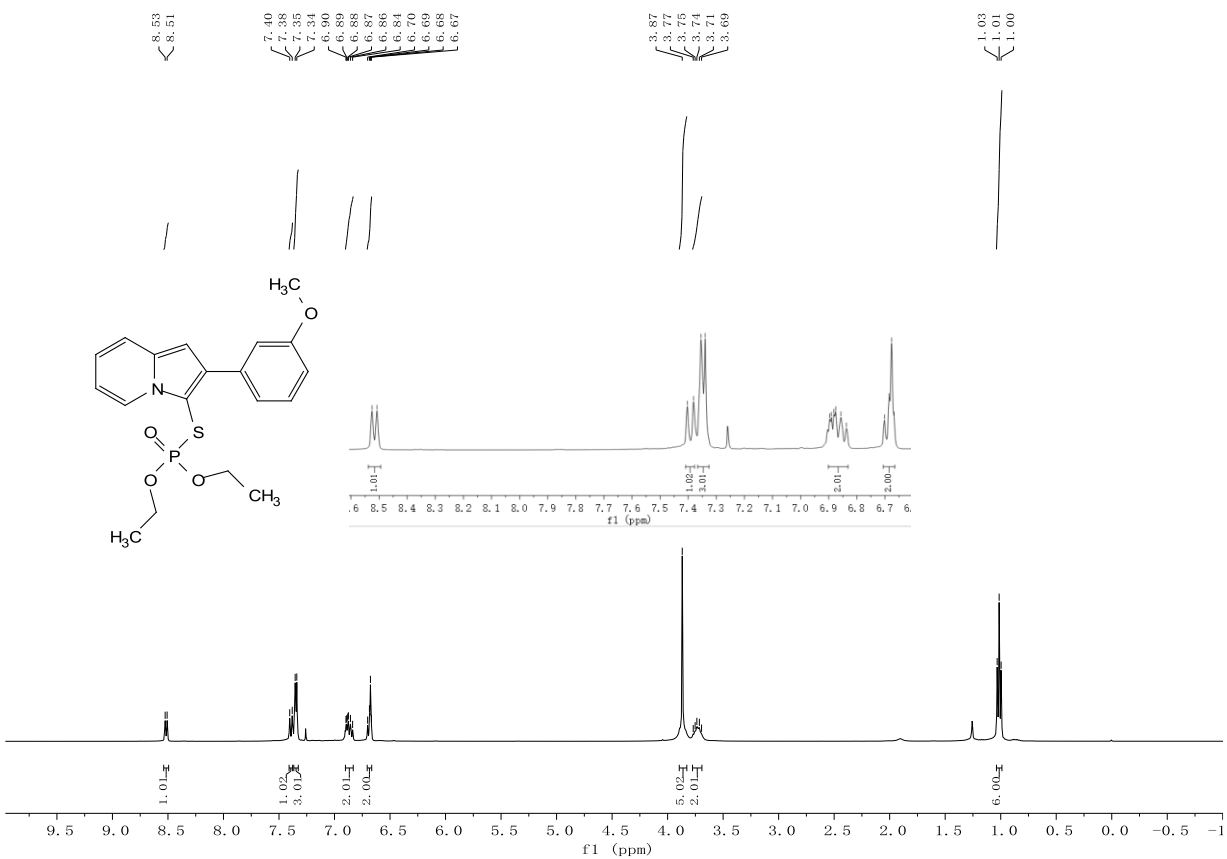

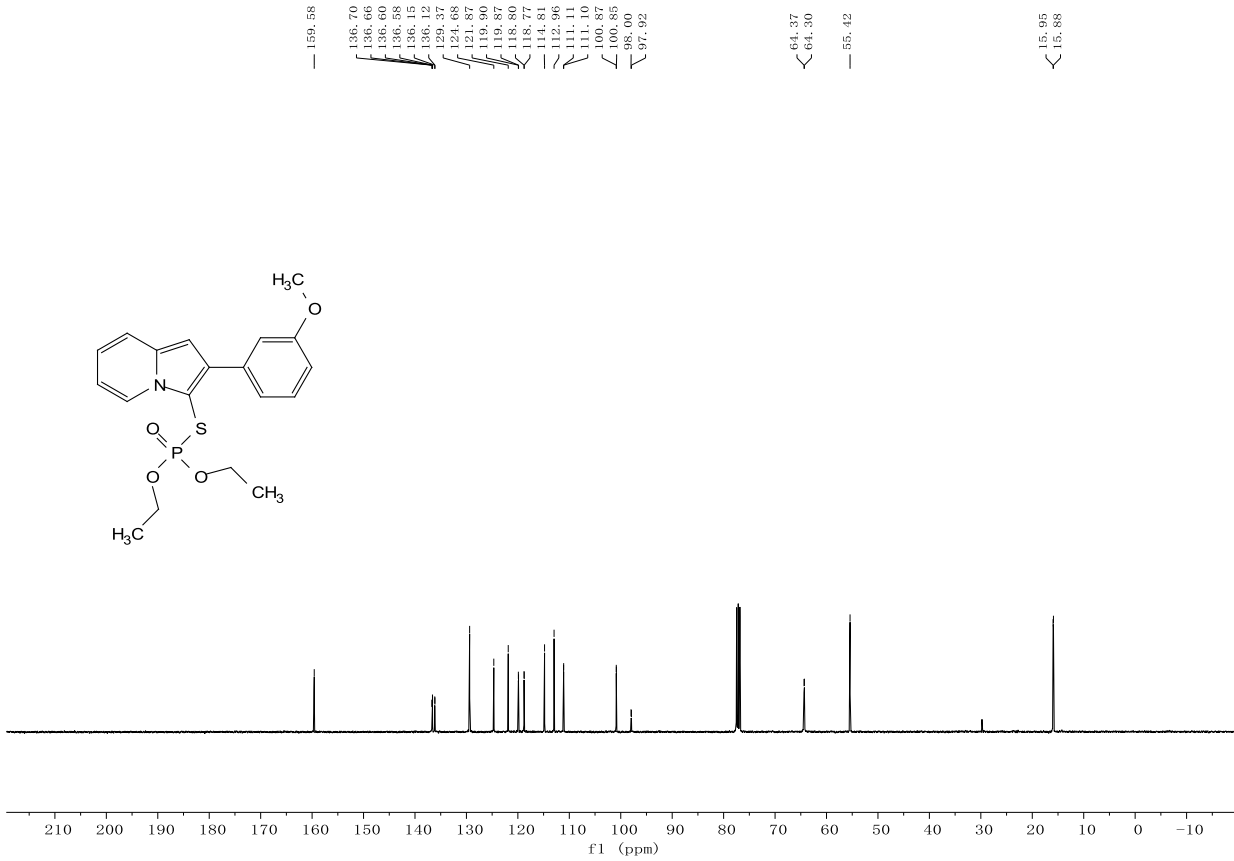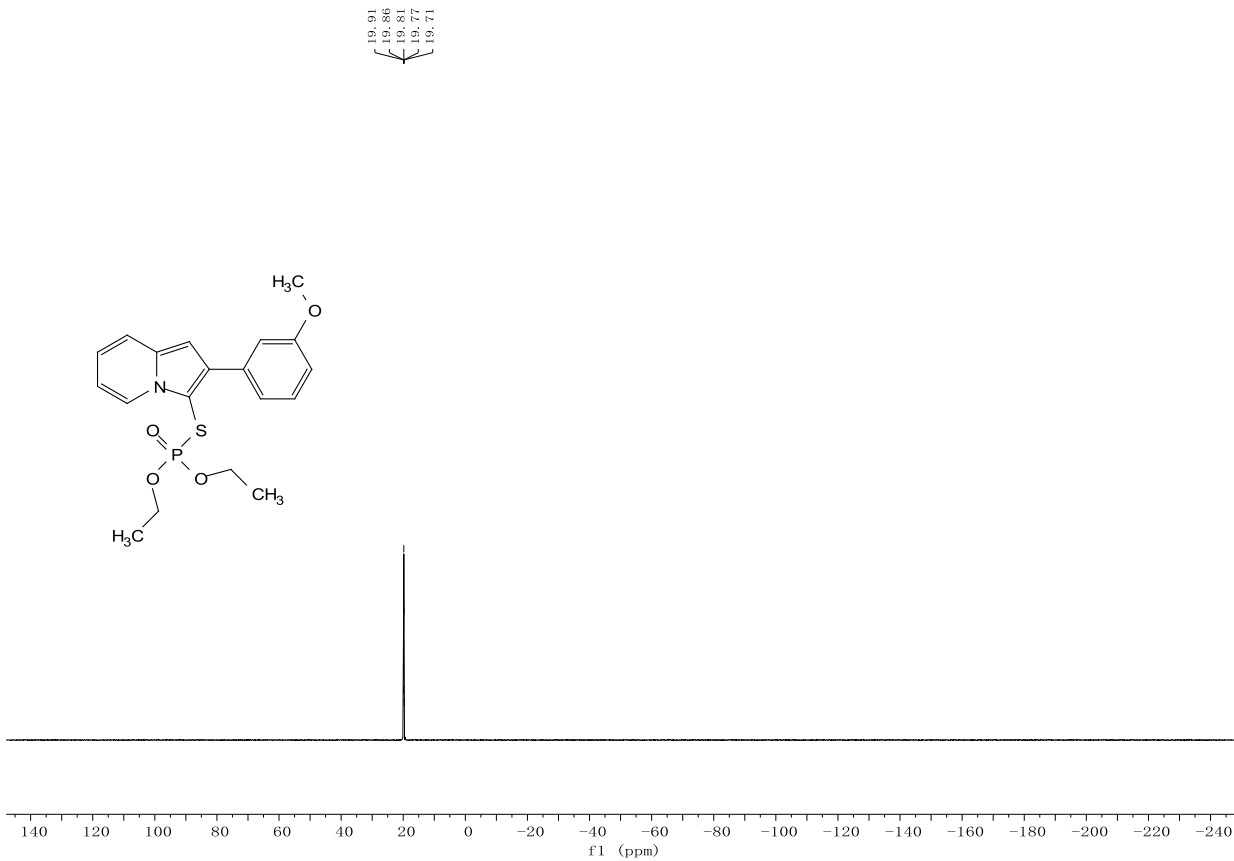

$^1\text{H}$  NMR (400 MHz,  $\text{CDCl}_3$ ),  $^{13}\text{C}$  NMR (100 MHz,  $\text{CDCl}_3$ ) and  $^{31}\text{P}$  NMR (162 MHz,  $\text{CDCl}_3$ ) spectrum of compound **31**

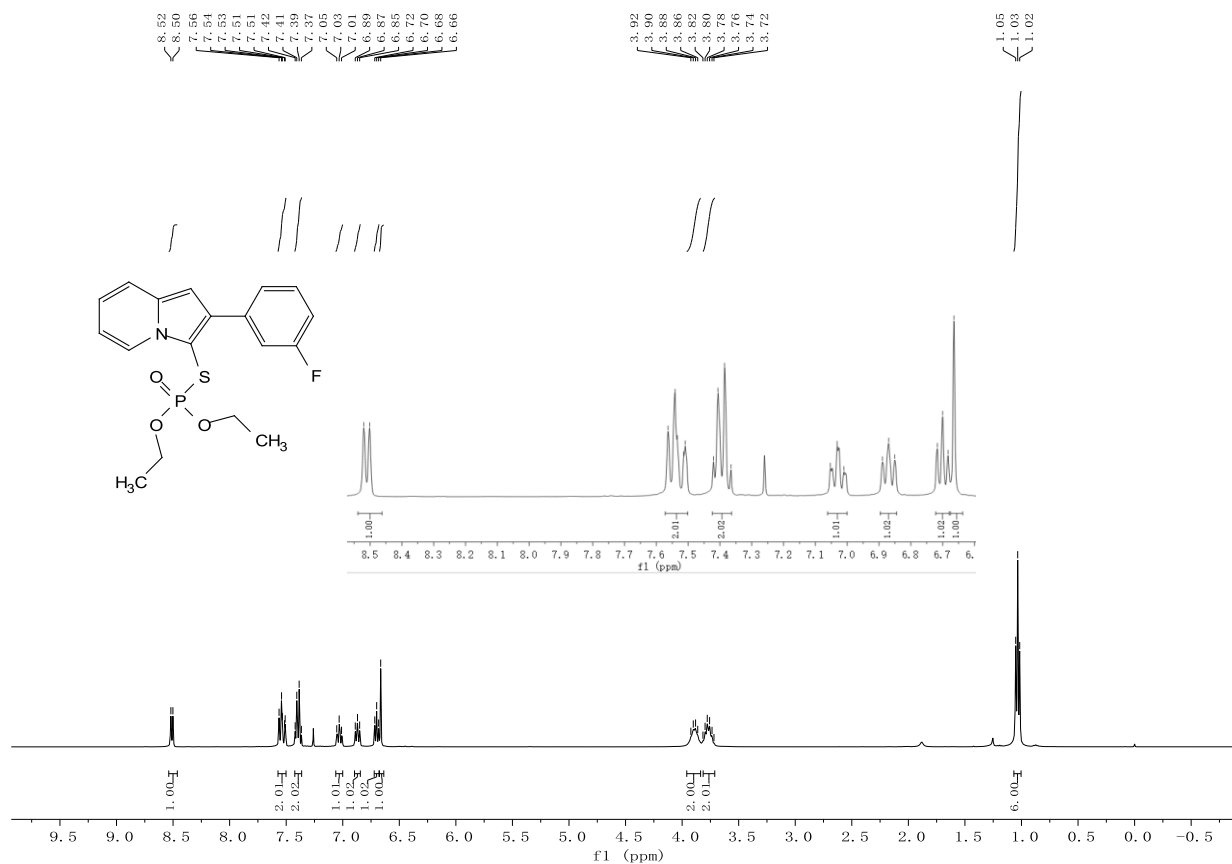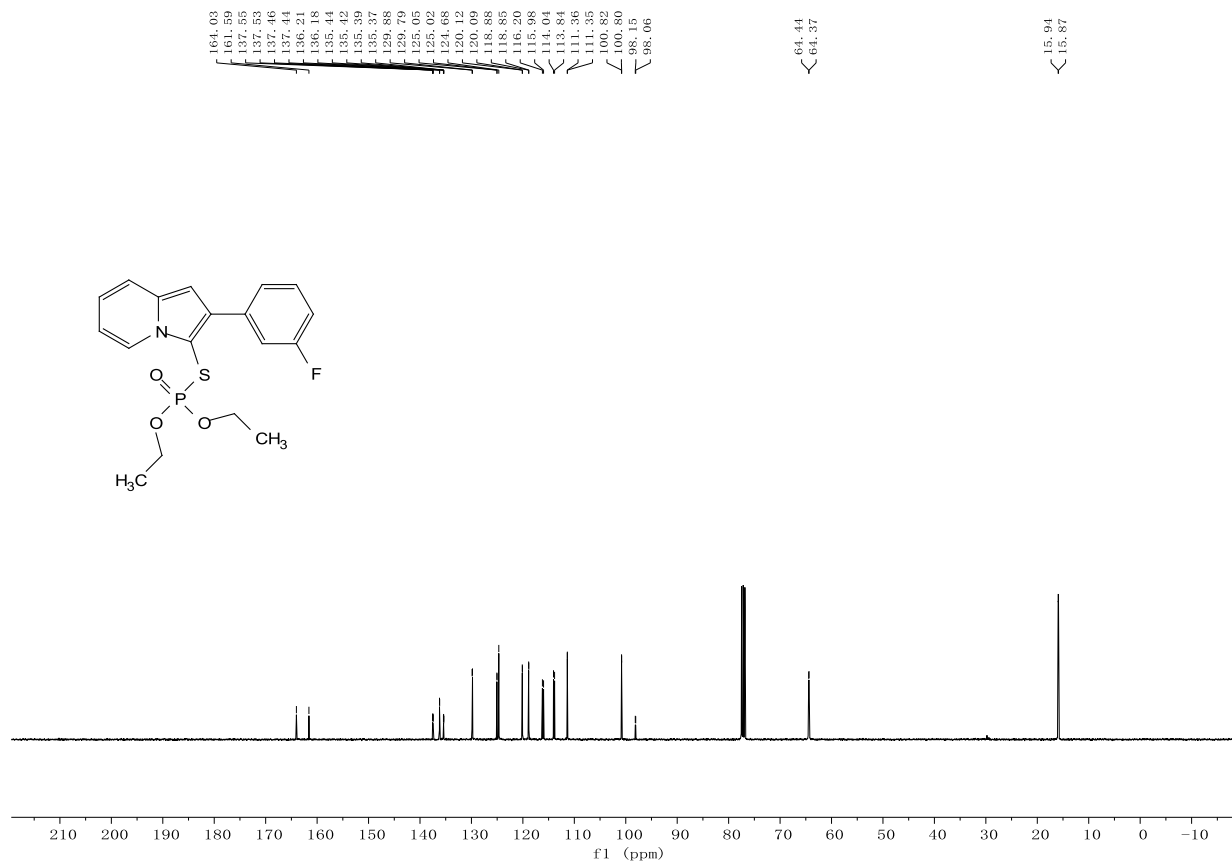

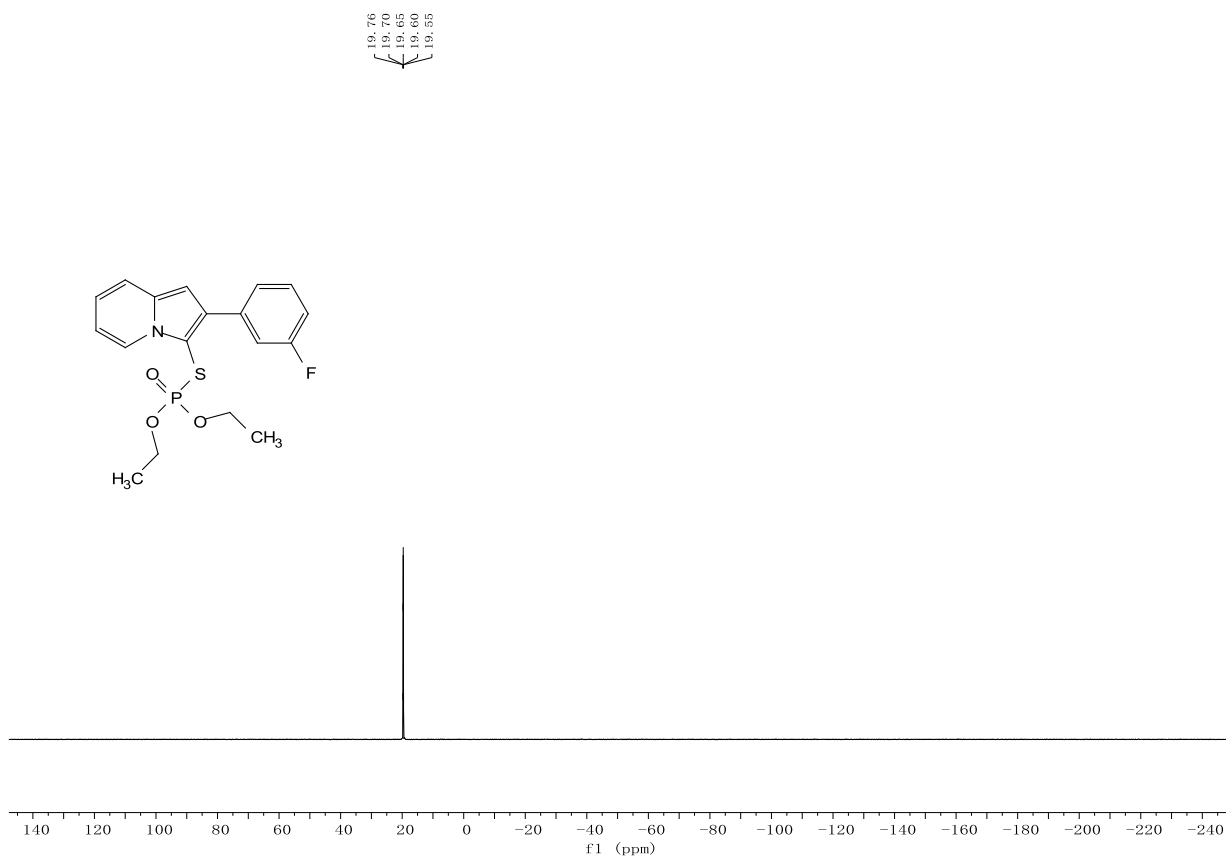

$^1\text{H}$  NMR (400 MHz,  $\text{CDCl}_3$ ),  $^{13}\text{C}$  NMR (100 MHz,  $\text{CDCl}_3$ ) and  $^{31}\text{P}$  NMR (162 MHz,  $\text{CDCl}_3$ ) spectrum of compound **3m**

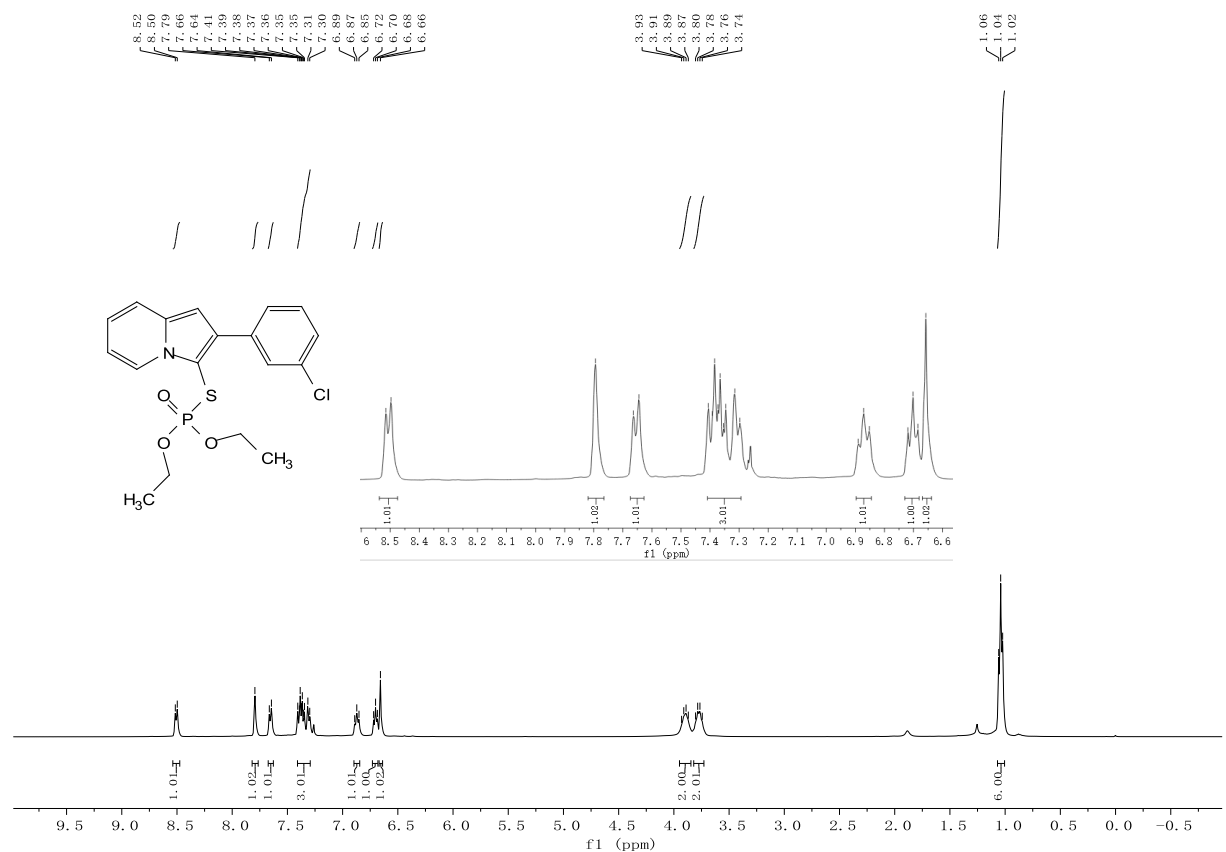



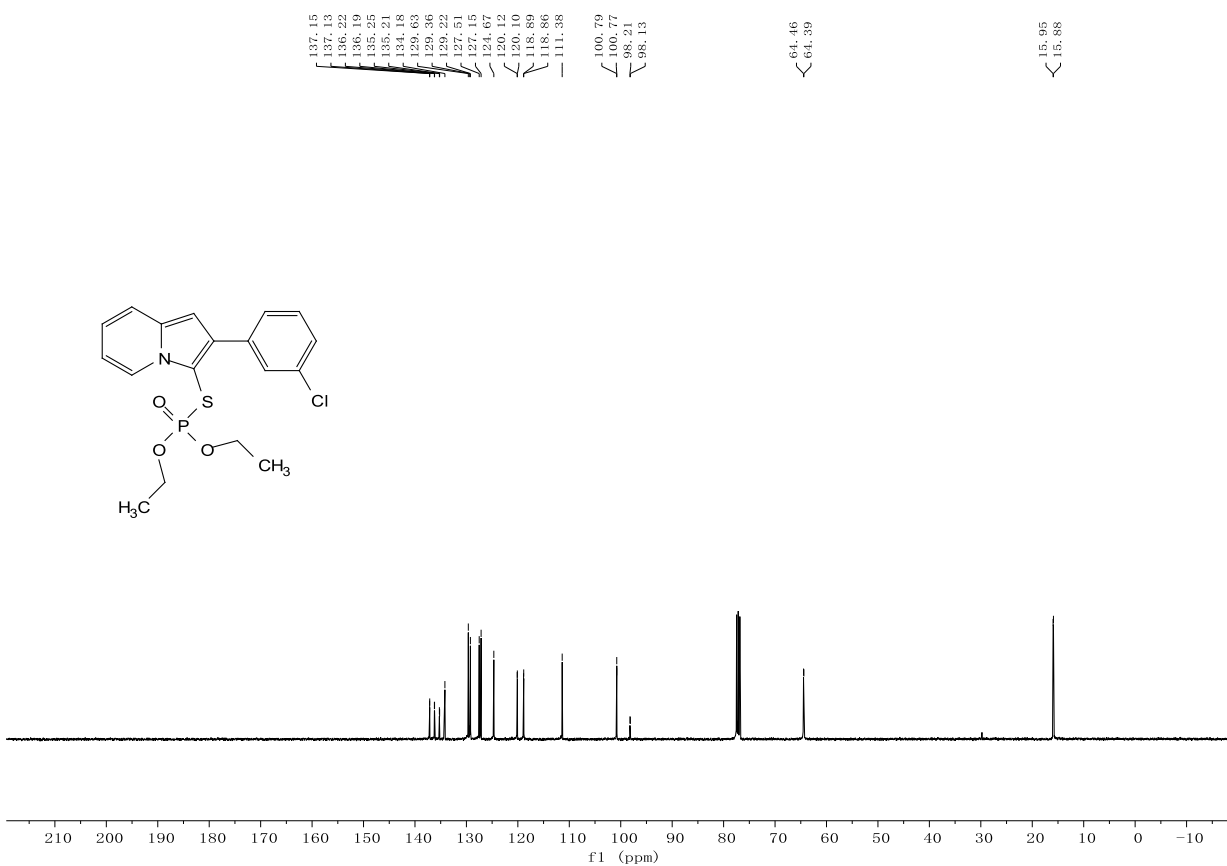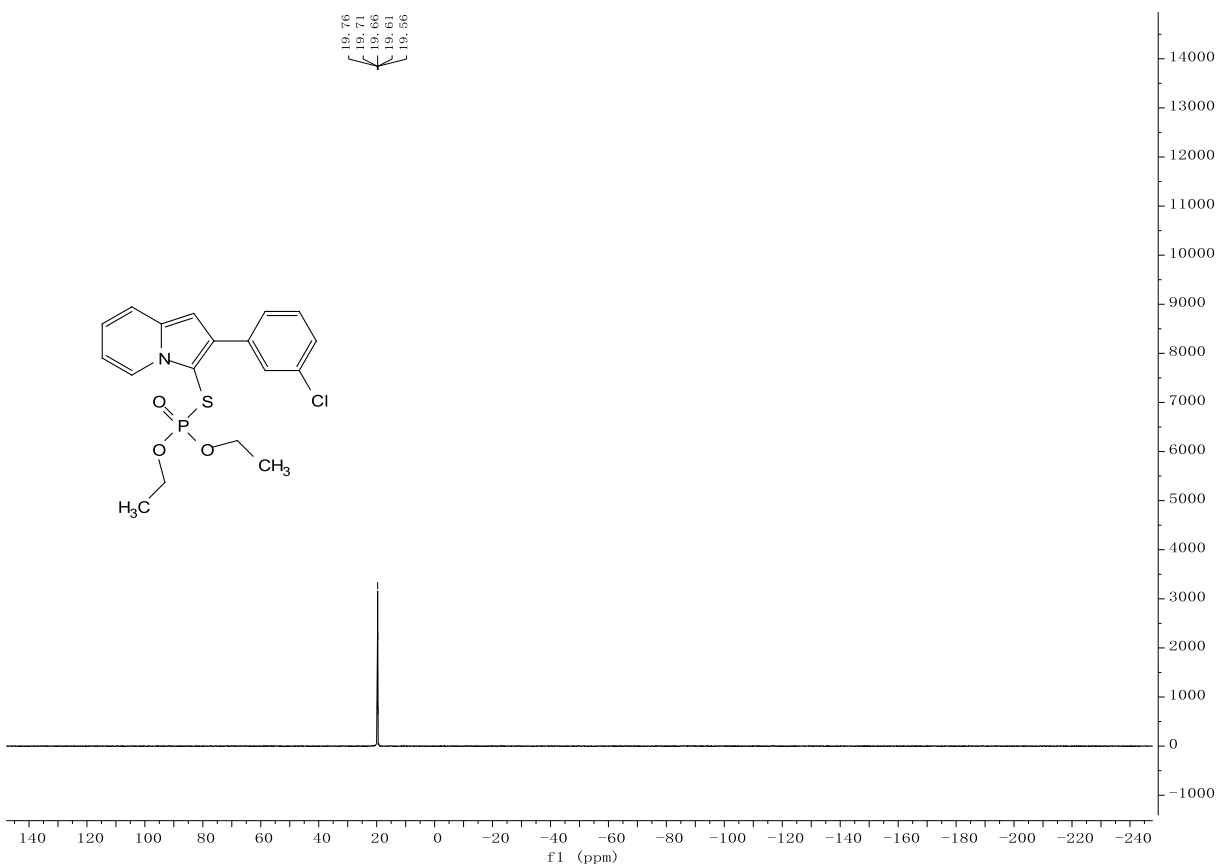

$^1\text{H}$  NMR (400 MHz,  $\text{CDCl}_3$ ),  $^{13}\text{C}$  NMR (100 MHz,  $\text{CDCl}_3$ ) and  $^{31}\text{P}$  NMR (162 MHz,  $\text{CDCl}_3$ ) spectrum of compound **3n**

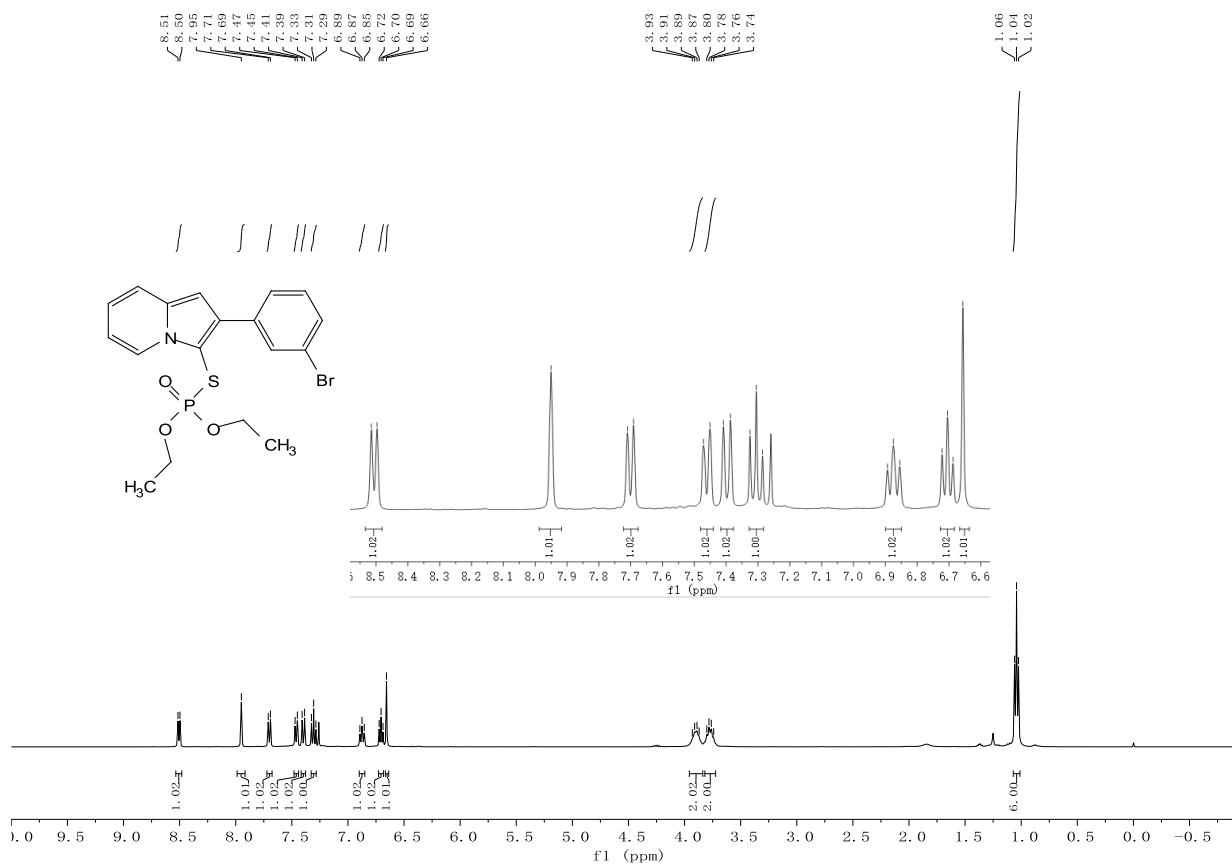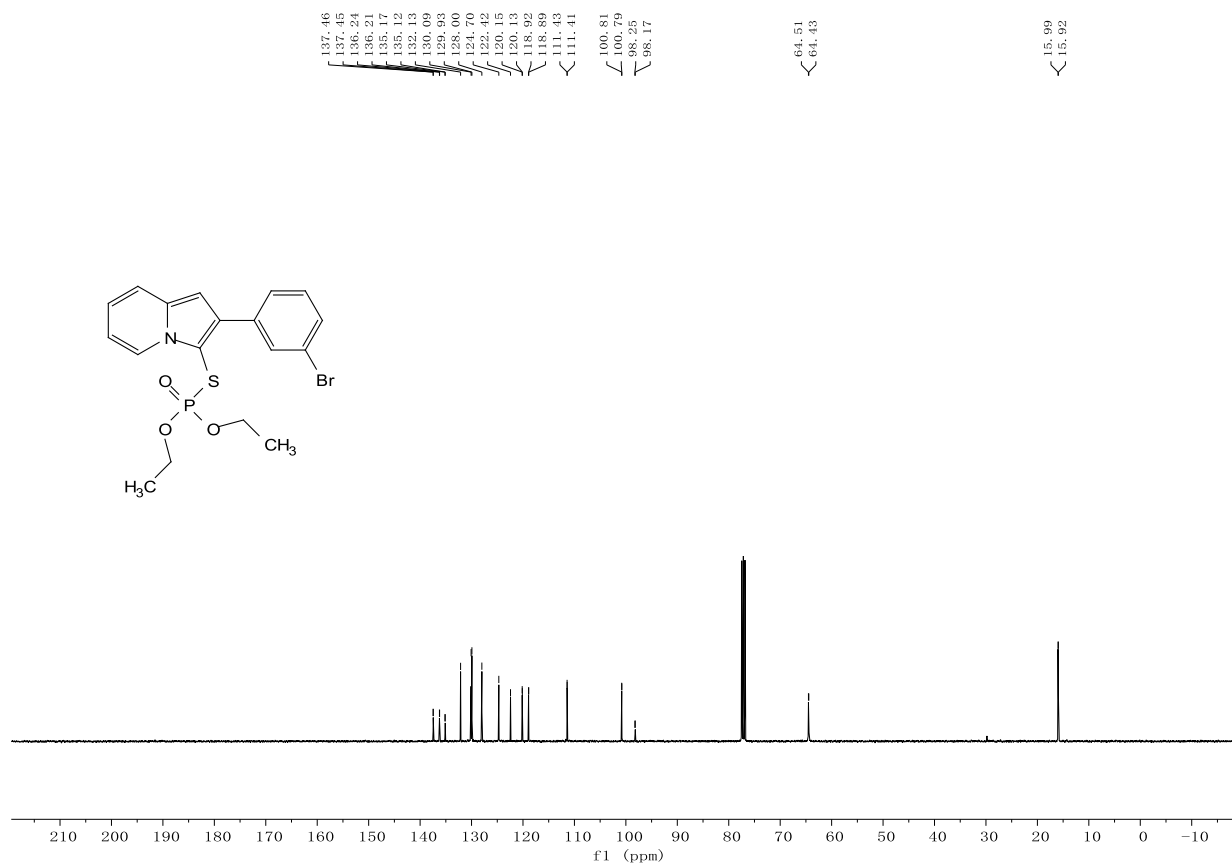

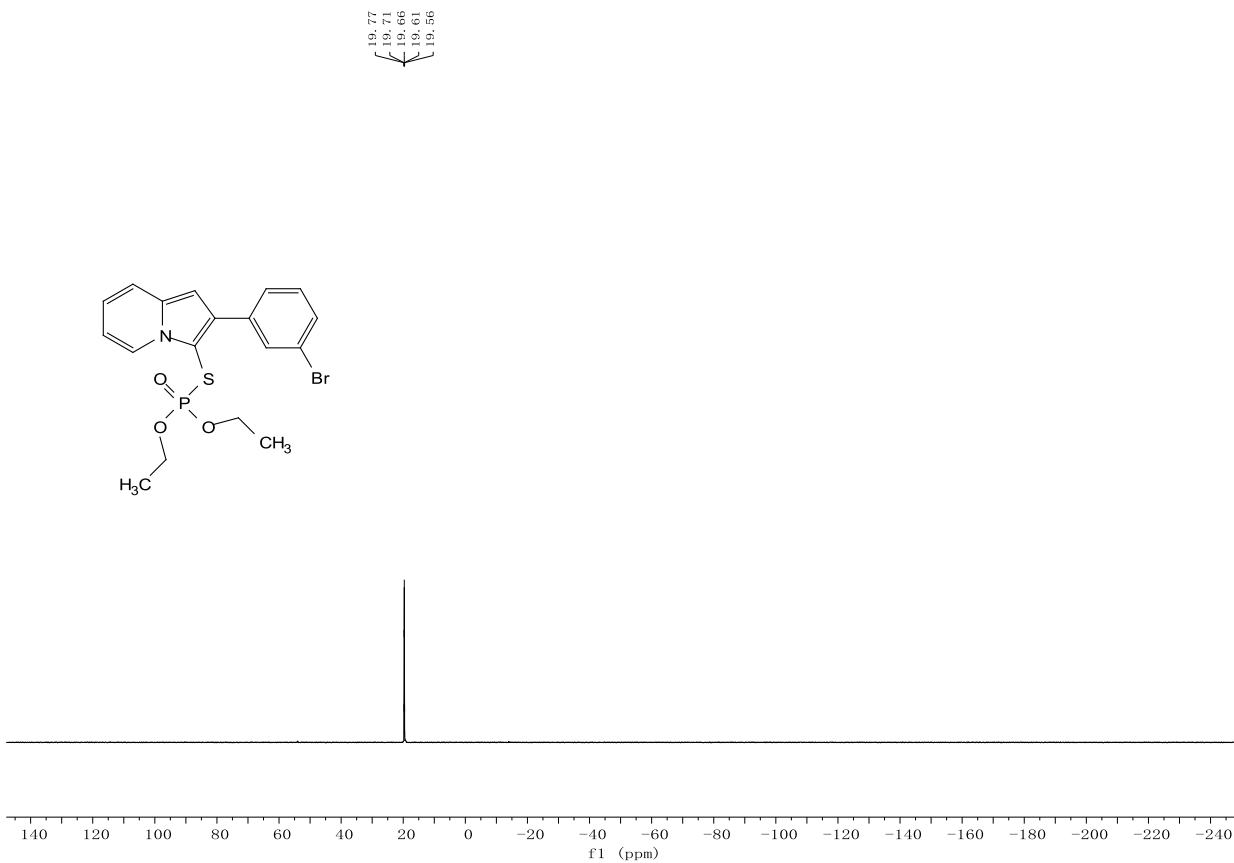

$^1\text{H}$  NMR (400 MHz,  $\text{CDCl}_3$ ),  $^{13}\text{C}$  NMR (100 MHz,  $\text{CDCl}_3$ ) and  $^{31}\text{P}$  NMR (162 MHz,  $\text{CDCl}_3$ ) spectrum of compound **30**

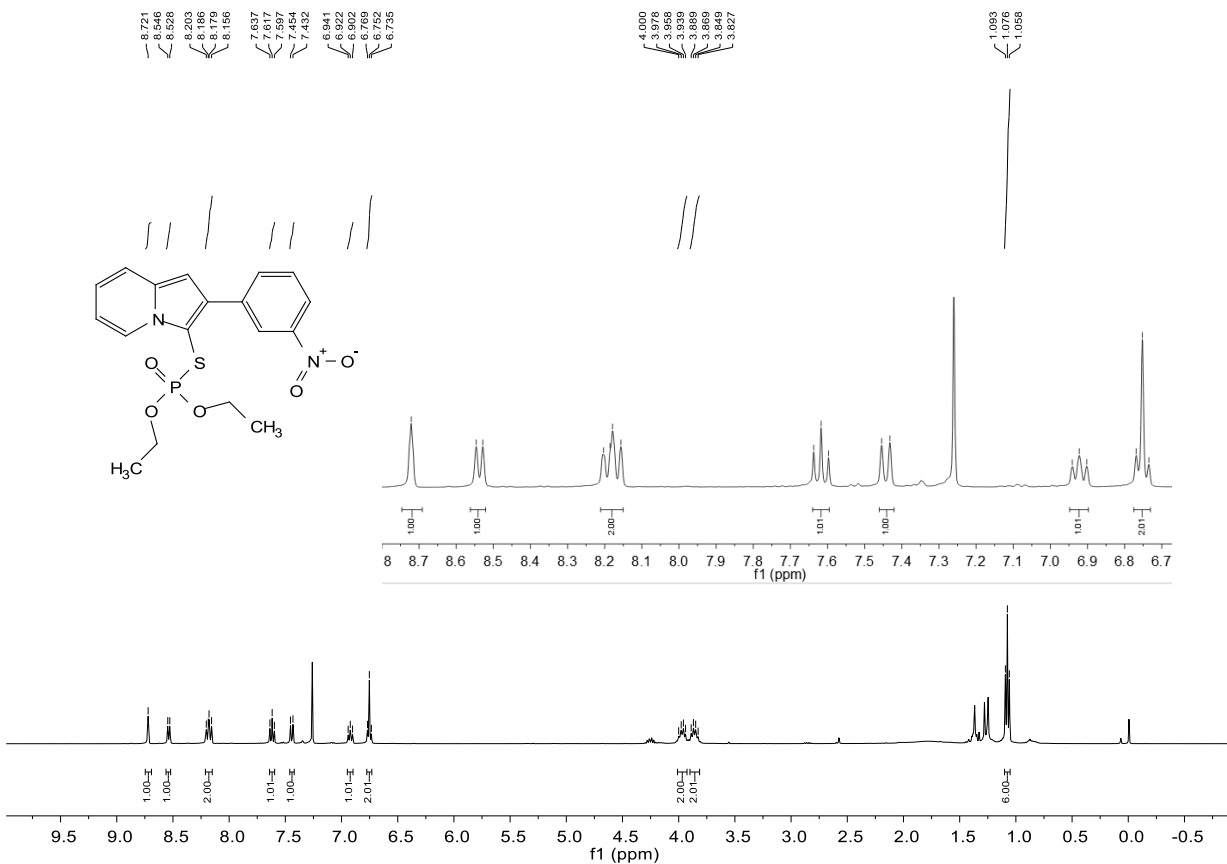

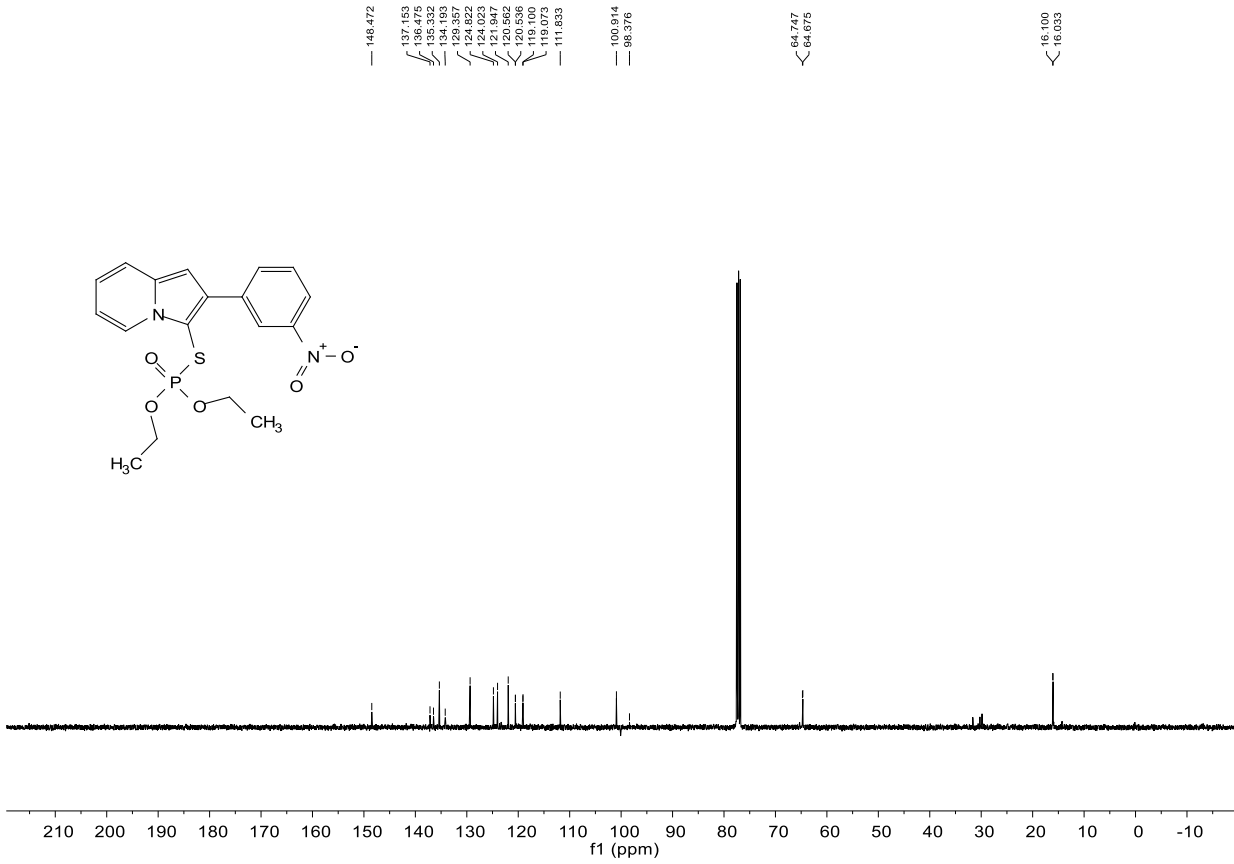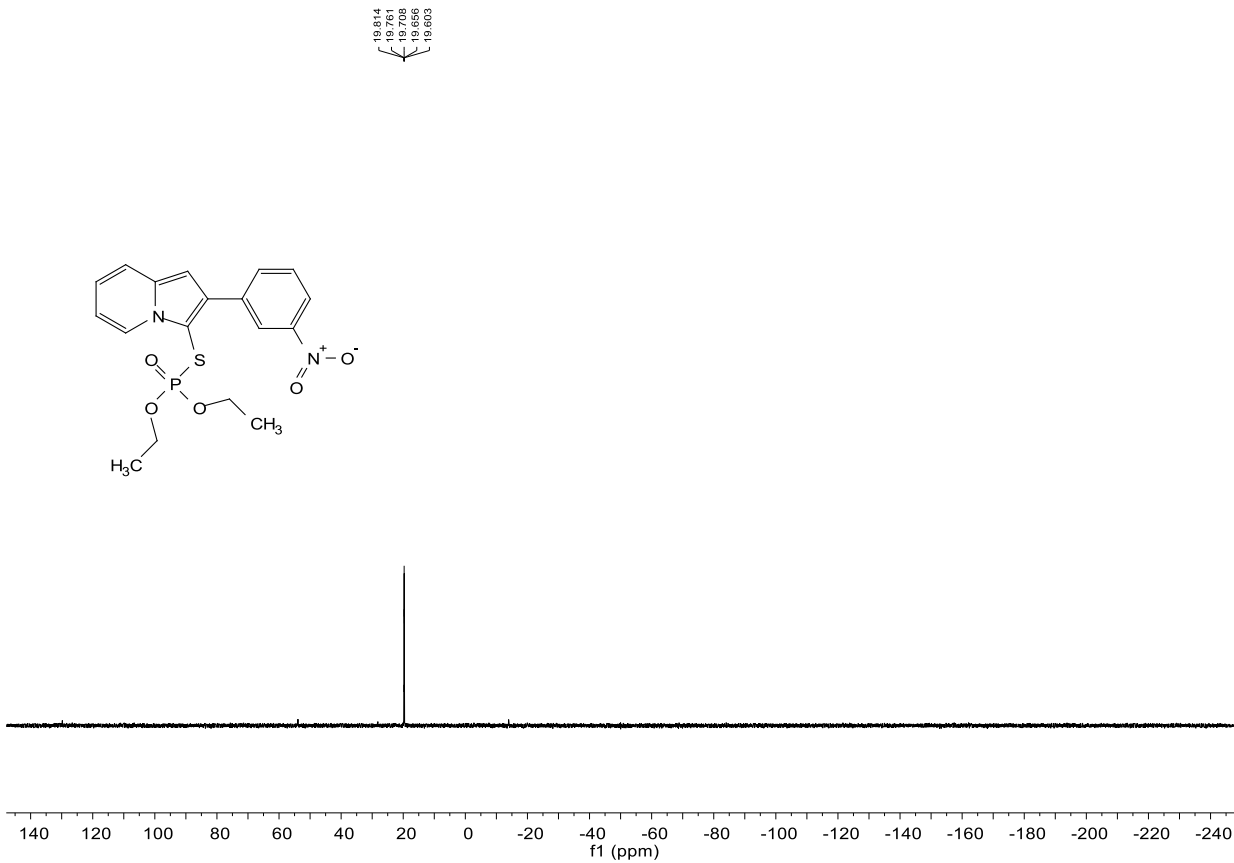

$^1\text{H}$  NMR (400 MHz,  $\text{CDCl}_3$ ),  $^{13}\text{C}$  NMR (100 MHz,  $\text{CDCl}_3$ ) and  $^{31}\text{P}$  NMR (162 MHz,  $\text{CDCl}_3$ ) spectrum of compound **3p**

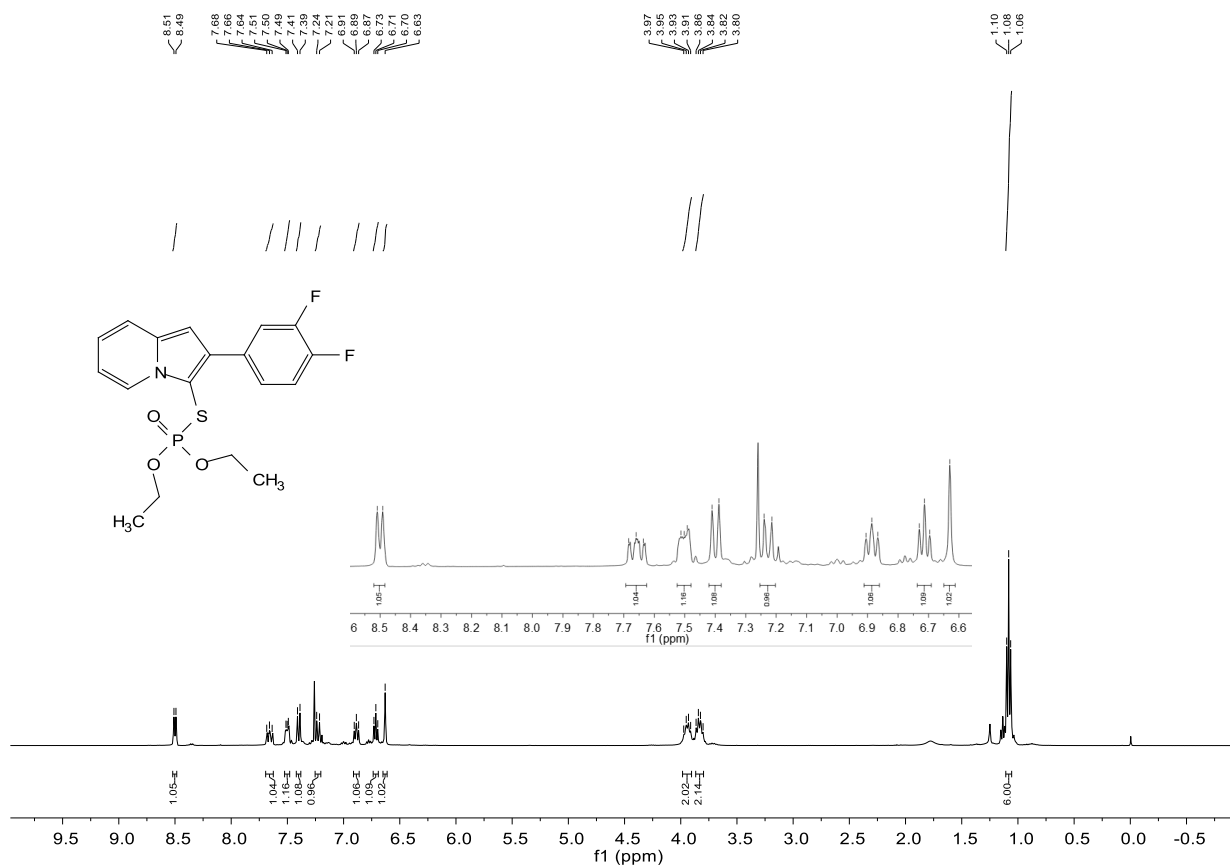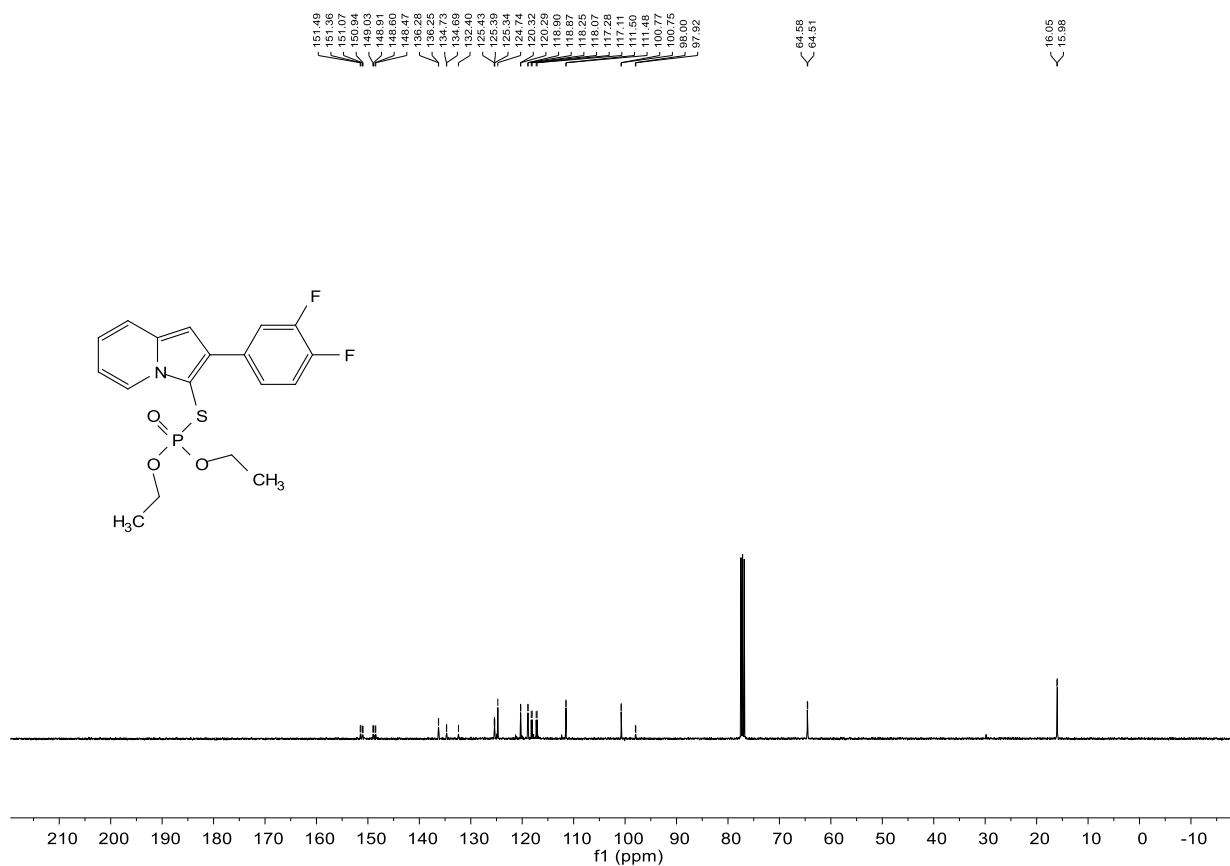



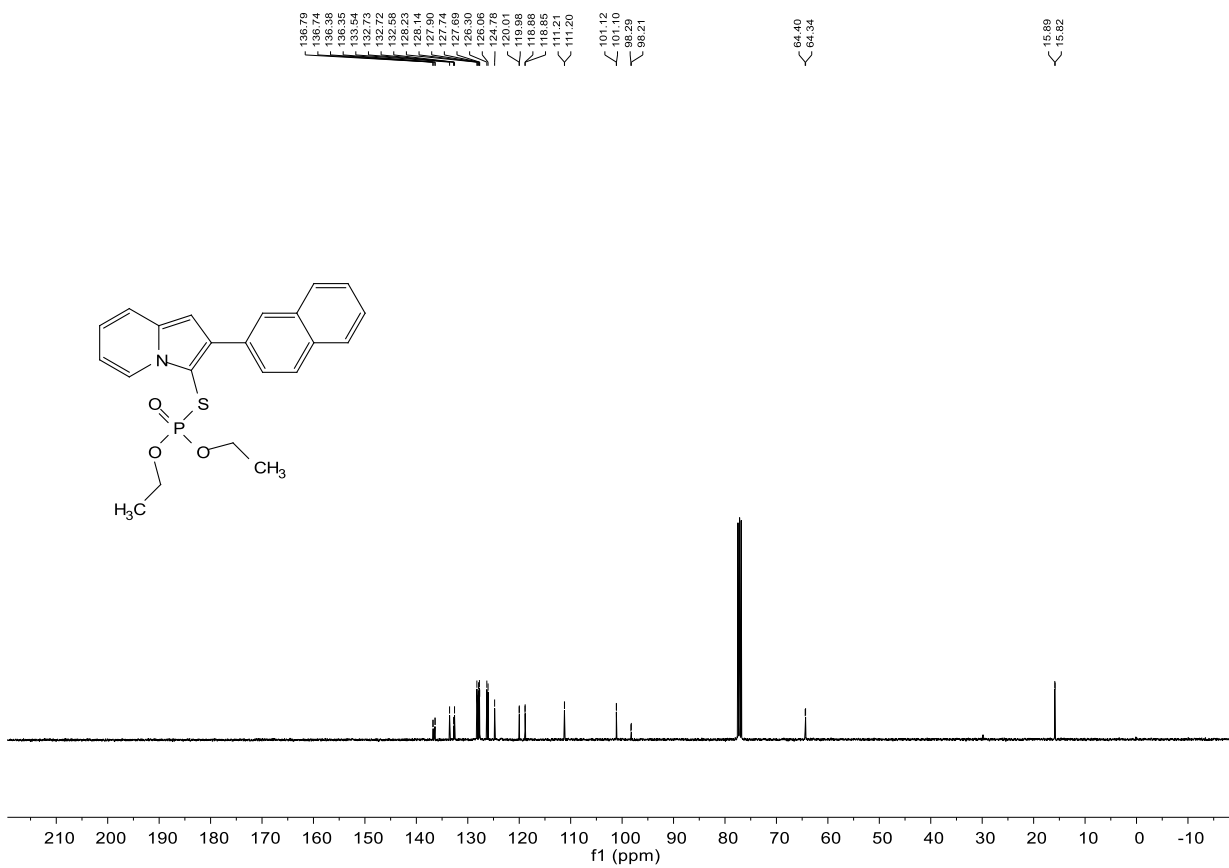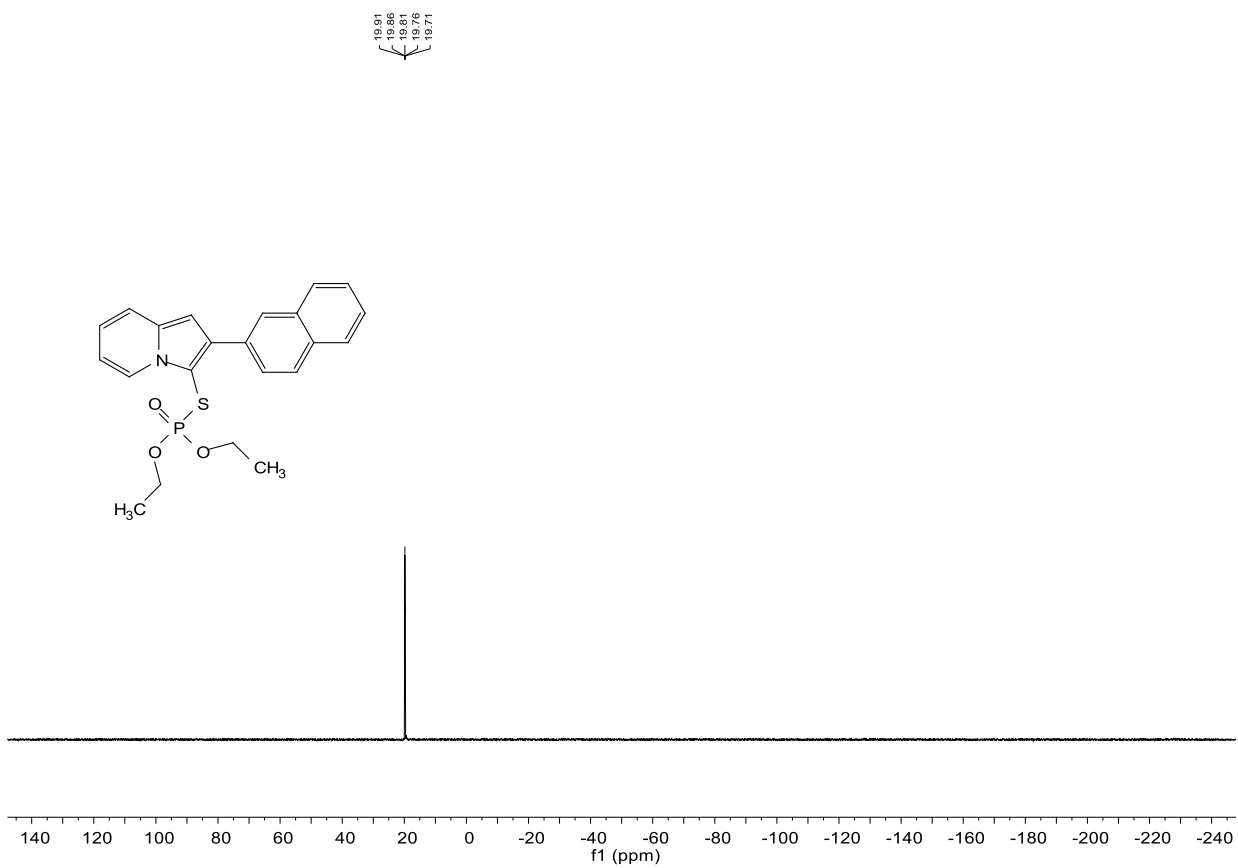

$^1\text{H}$  NMR (400 MHz,  $\text{CDCl}_3$ ),  $^{13}\text{C}$  NMR (100 MHz,  $\text{CDCl}_3$ ) and  $^{31}\text{P}$  NMR (162 MHz,  $\text{CDCl}_3$ ) spectrum of compound **3r**

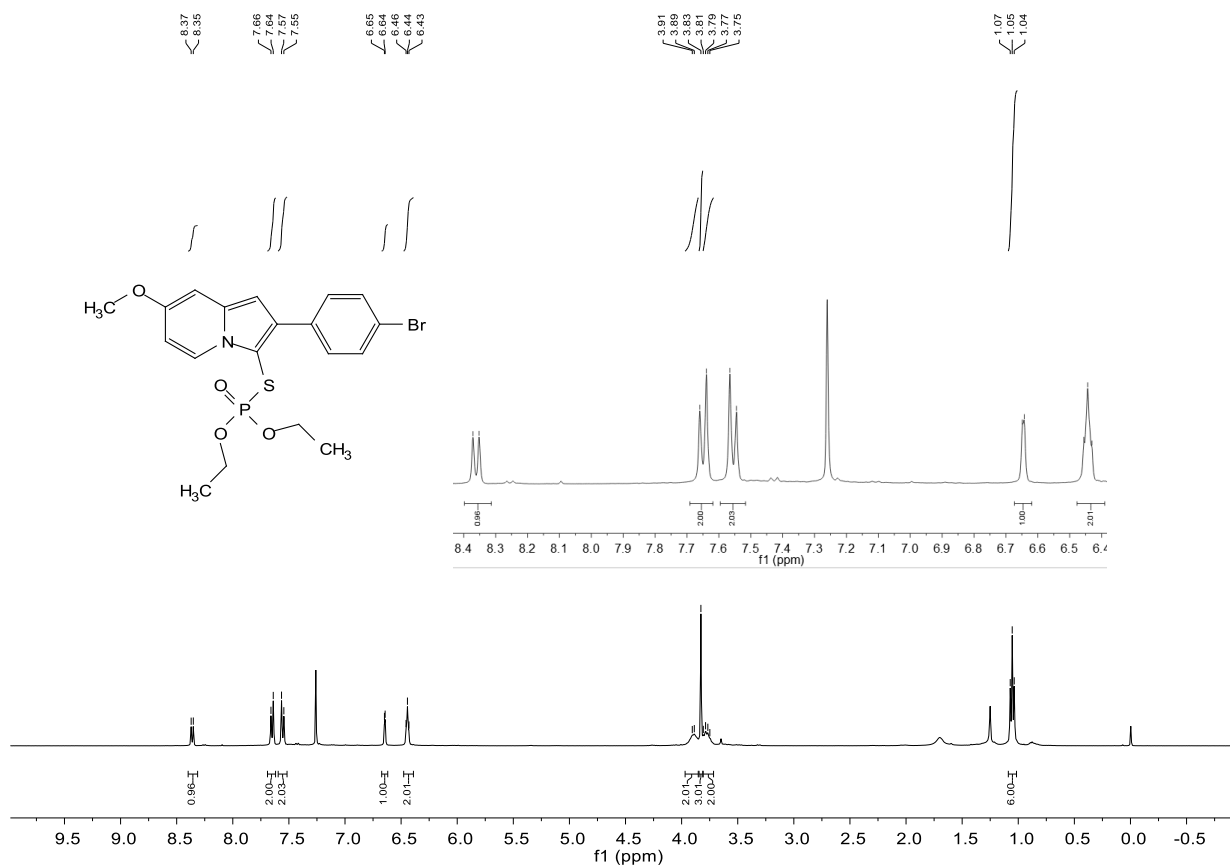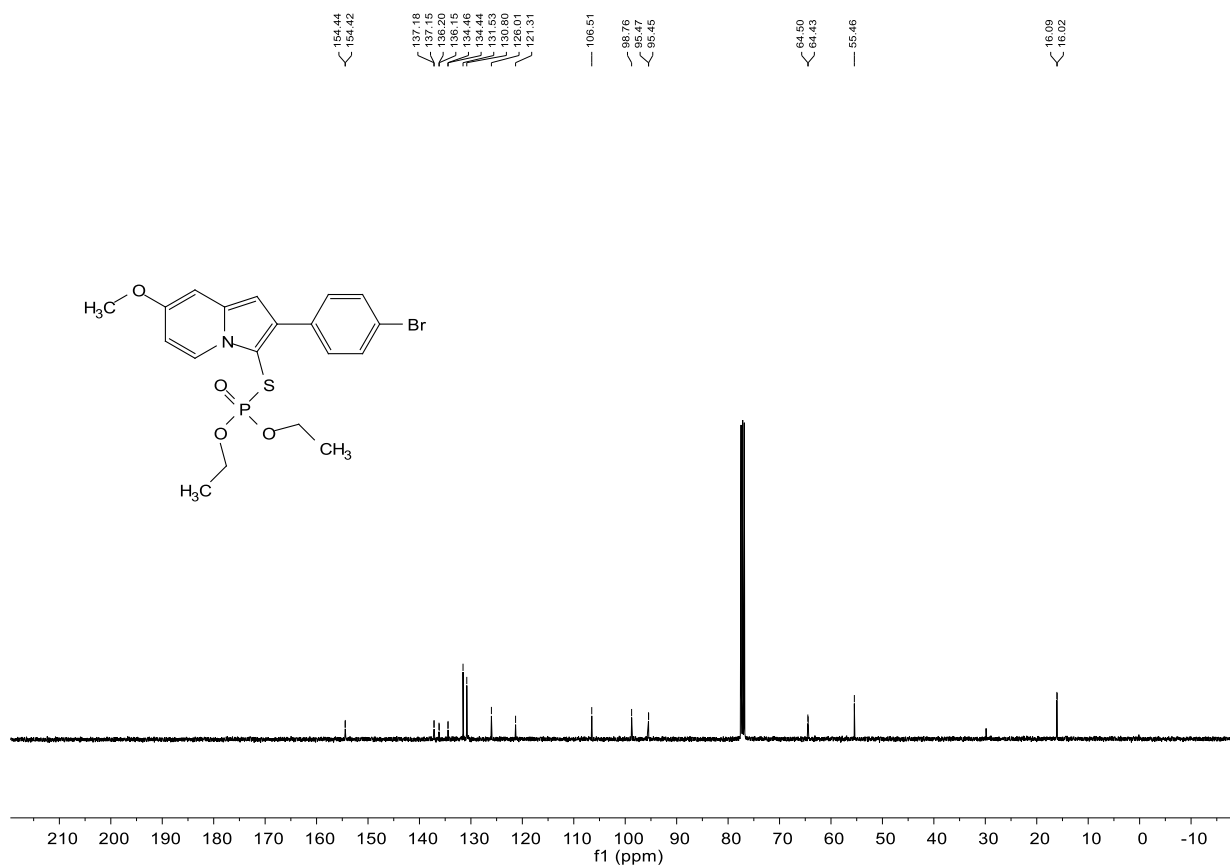



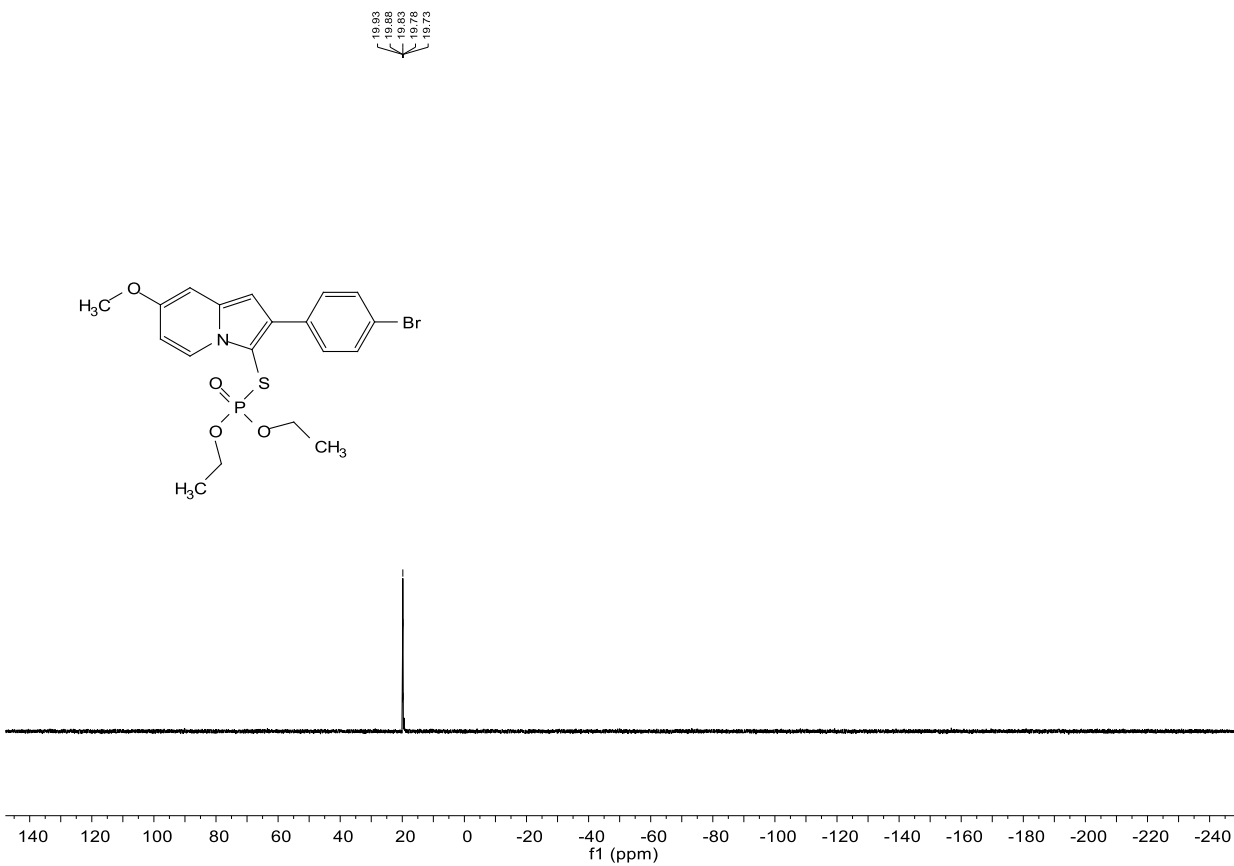

$^1\text{H NMR (400 MHz, CDCl}_3\text{)}$ ,  $^{13}\text{C NMR (100 MHz, CDCl}_3\text{)}$  and  $^{31}\text{P NMR (162 MHz, CDCl}_3\text{)}$  spectrum of compound **3s**

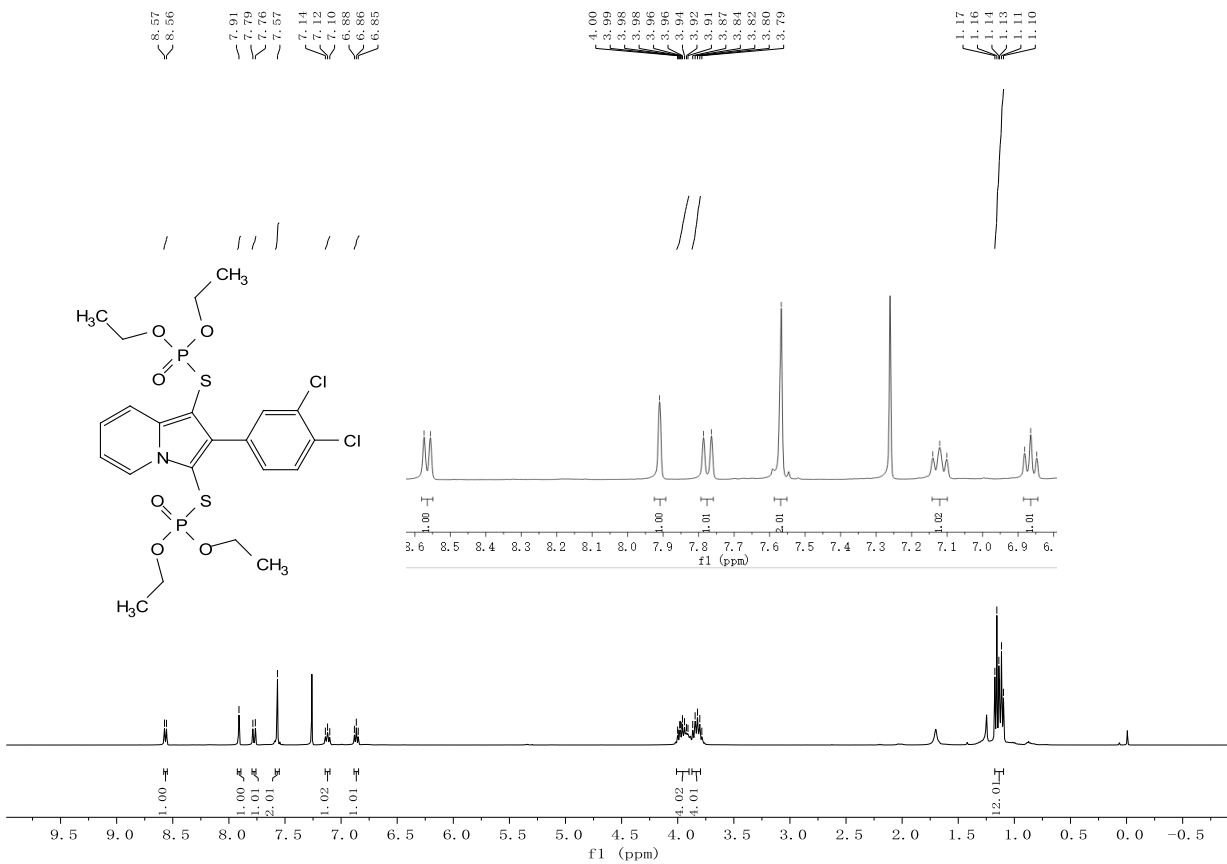

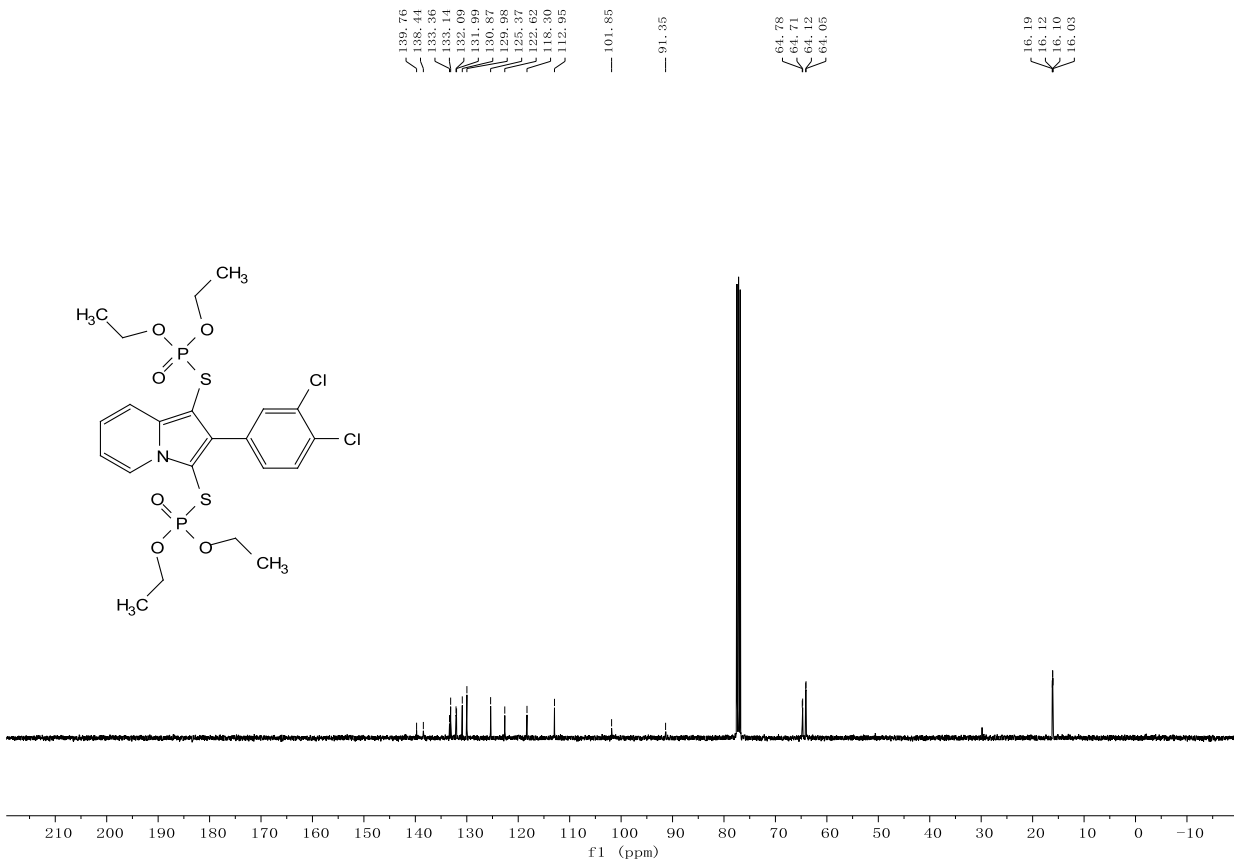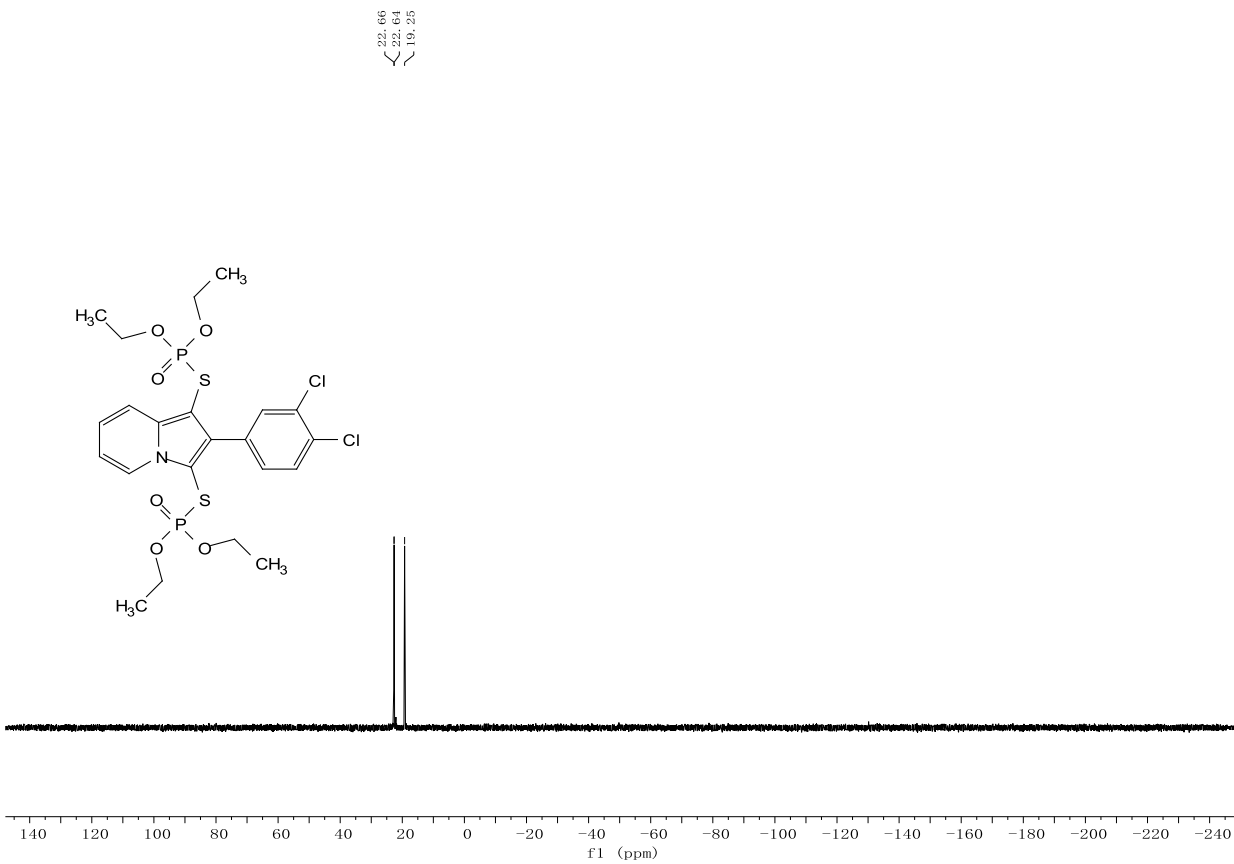

$^1\text{H}$  NMR (400 MHz,  $\text{CDCl}_3$ ),  $^{13}\text{C}$  NMR (100 MHz,  $\text{CDCl}_3$ ) spectrum of compound **4a**

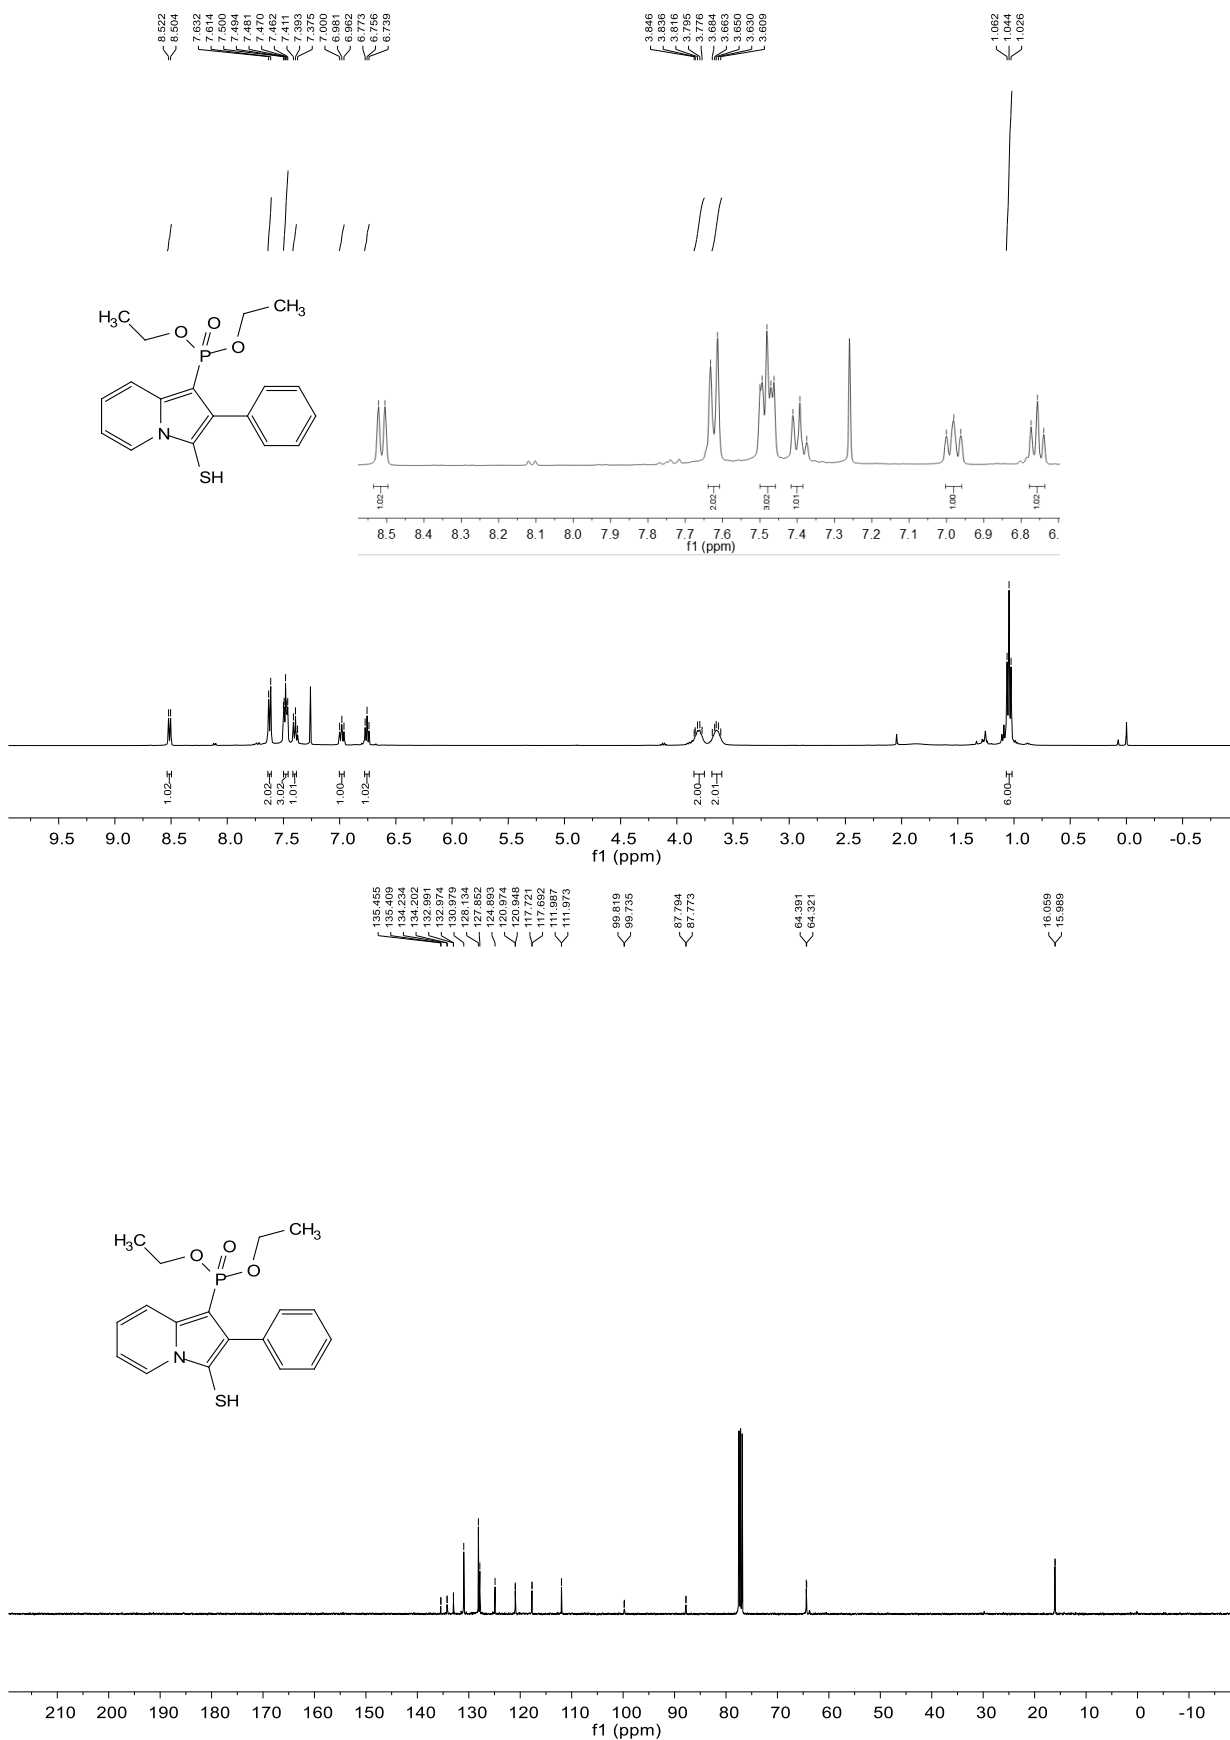

$^1\text{H}$  NMR (400 MHz,  $\text{CDCl}_3$ ),  $^{13}\text{C}$  NMR (100 MHz,  $\text{CDCl}_3$ ) and  $^{31}\text{P}$  NMR (162 MHz,  $\text{CDCl}_3$ ) spectrum of compound **4b**

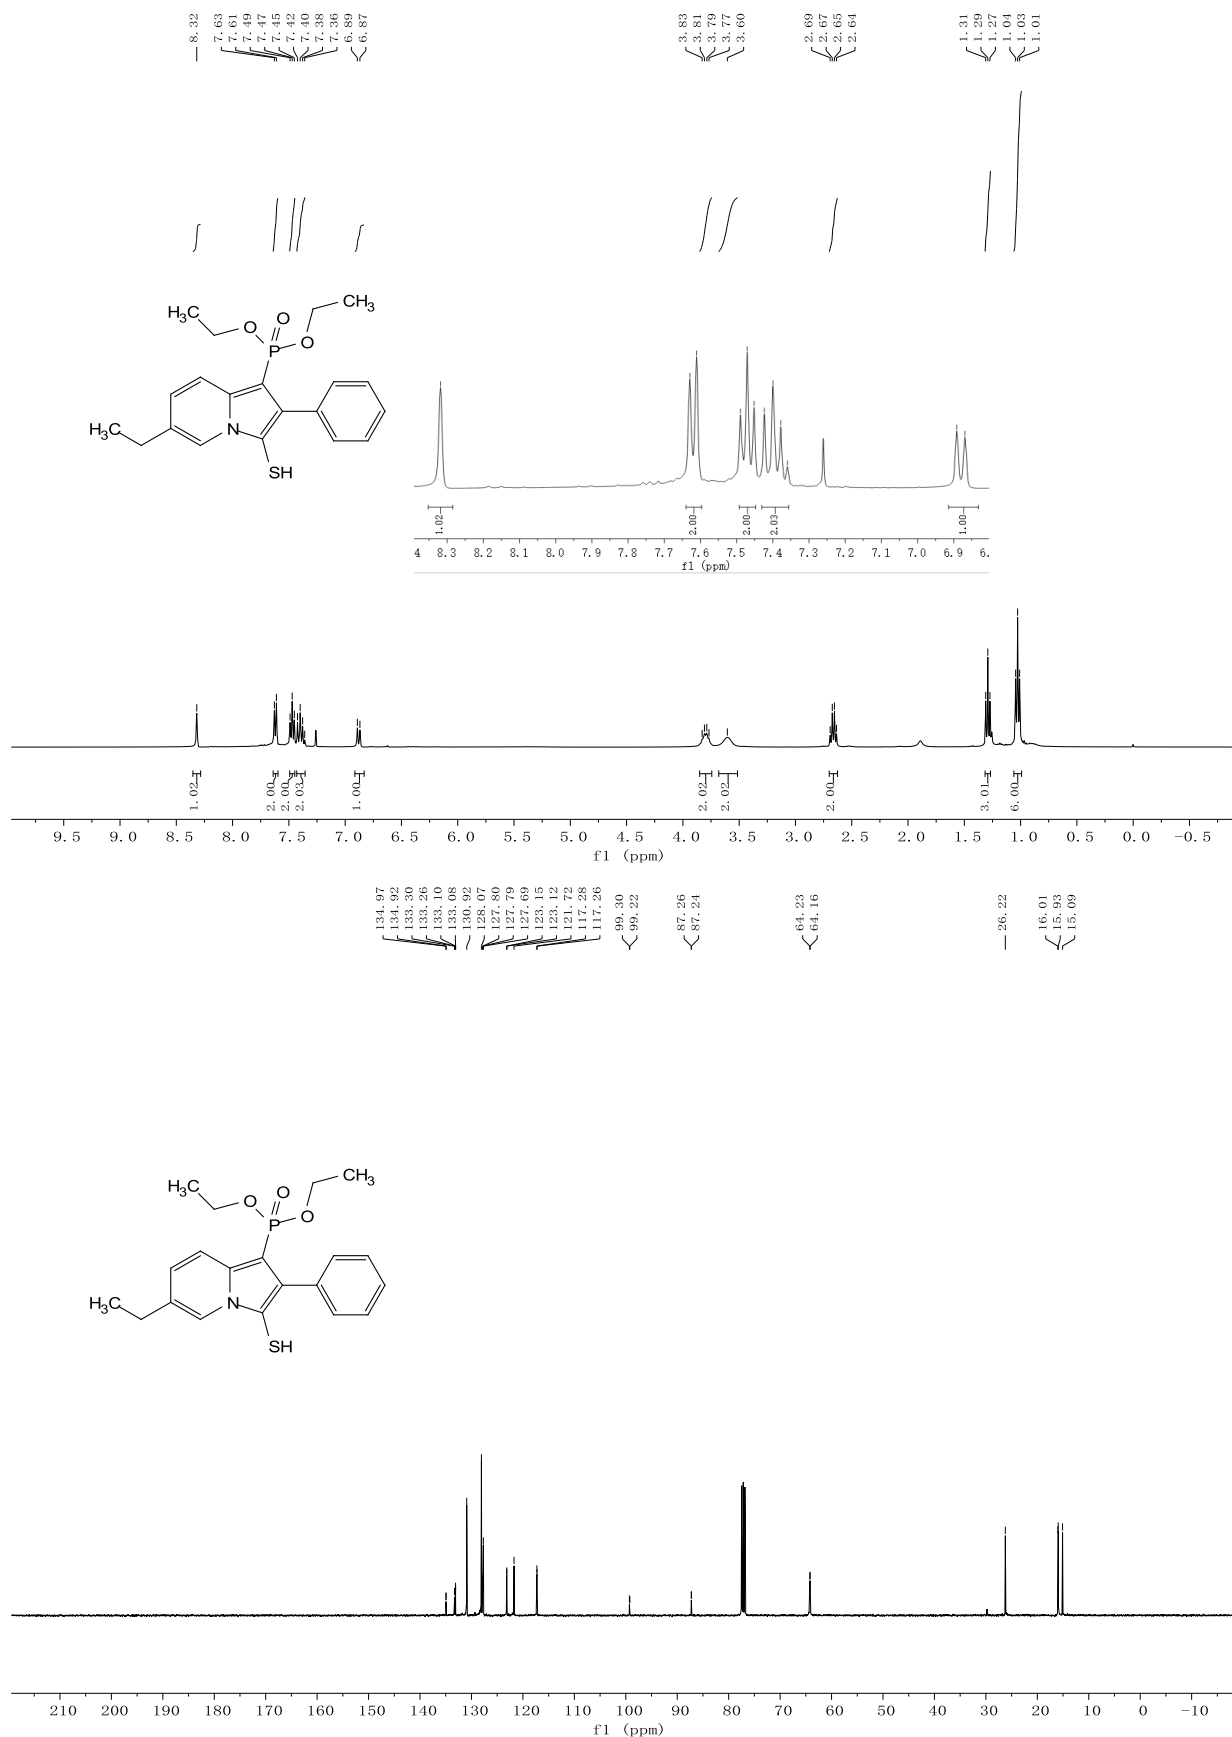

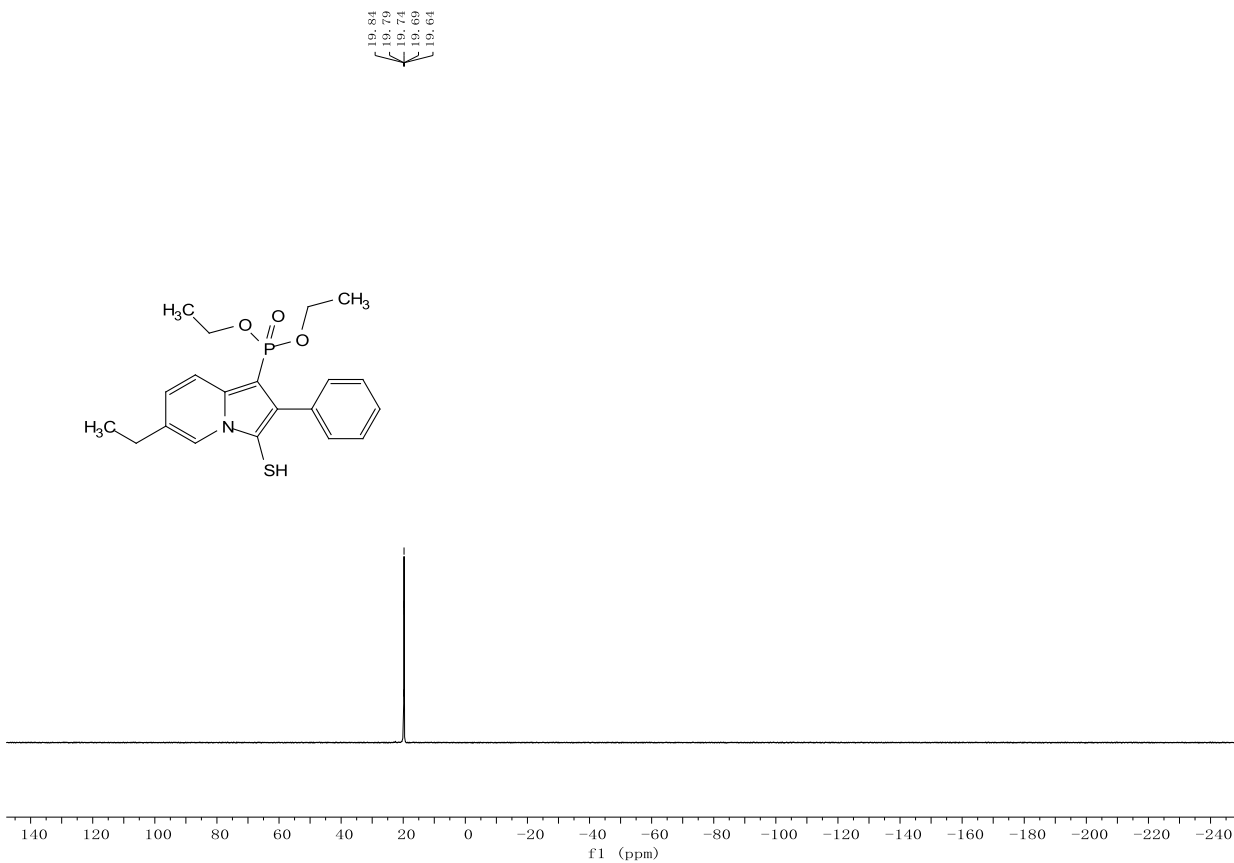

$^1\text{H}$  NMR (400 MHz,  $\text{CDCl}_3$ ),  $^{13}\text{C}$  NMR (100 MHz,  $\text{CDCl}_3$ ) and  $^{31}\text{P}$  NMR (162 MHz,  $\text{CDCl}_3$ ) spectrum of compound **4c**

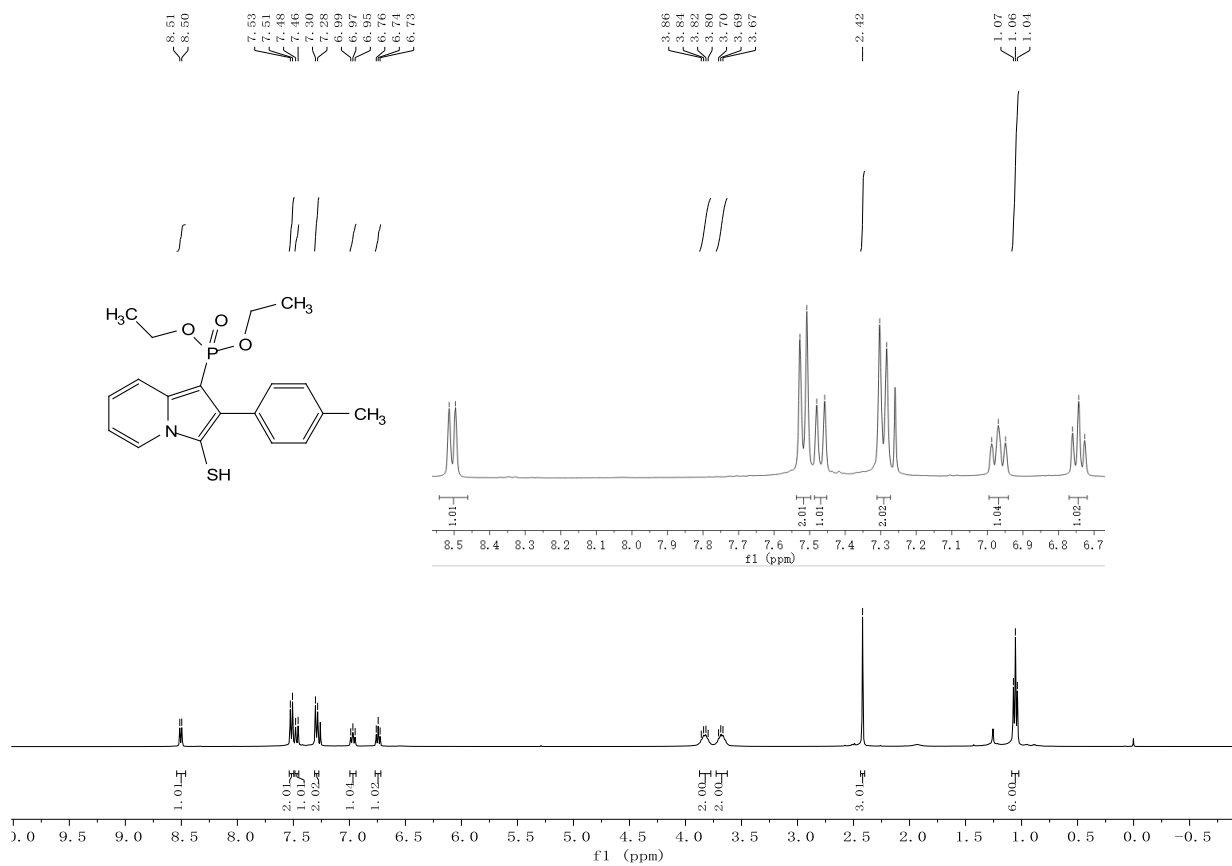

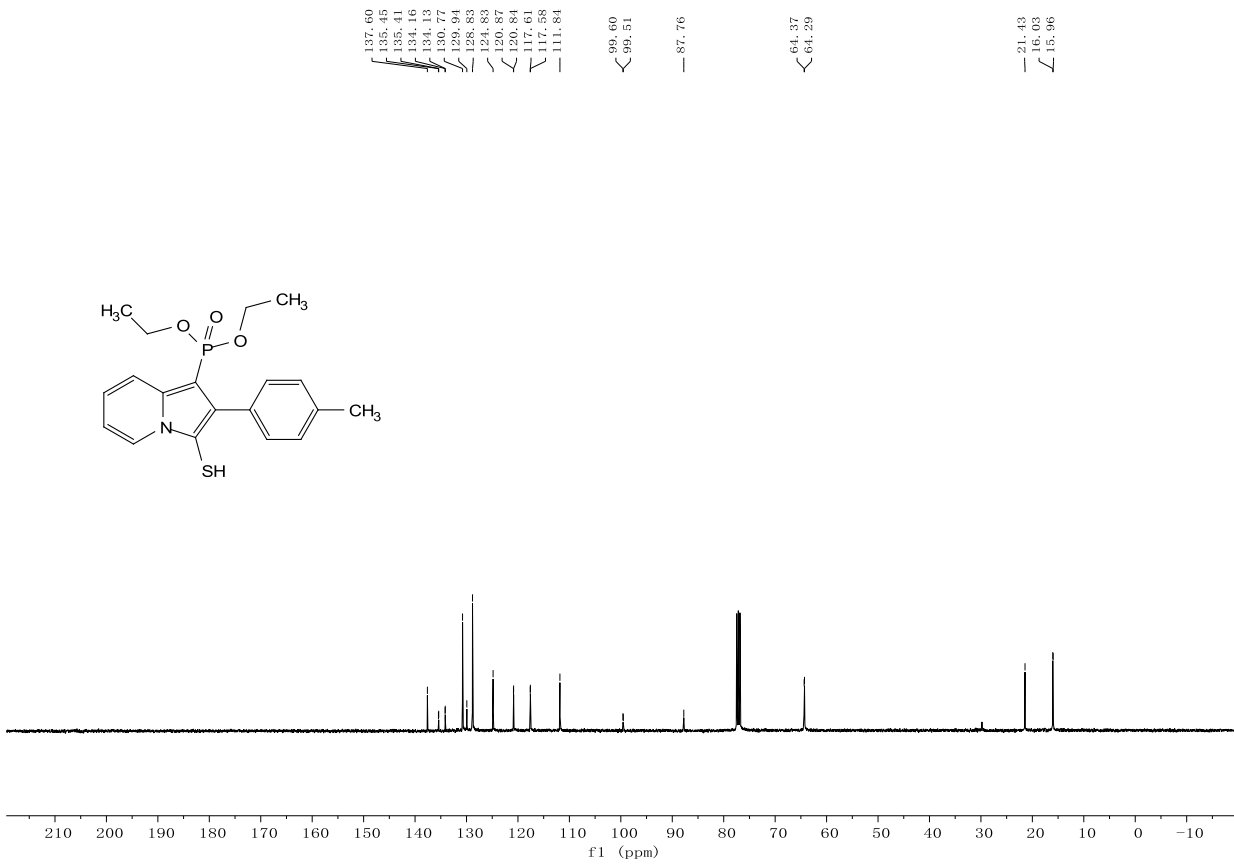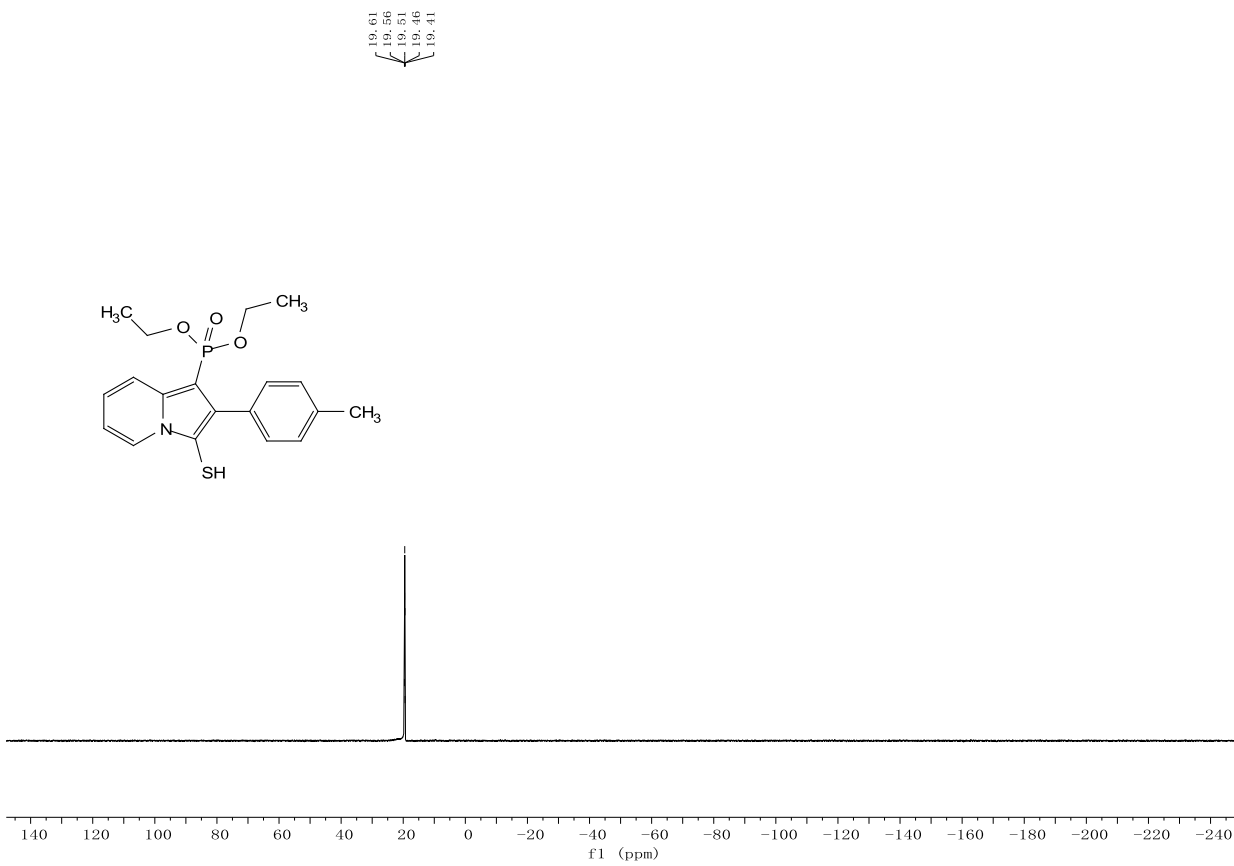

$^1\text{H}$  NMR (400 MHz,  $\text{CDCl}_3$ ),  $^{13}\text{C}$  NMR (100 MHz,  $\text{CDCl}_3$ ) spectrum of compound **4d**

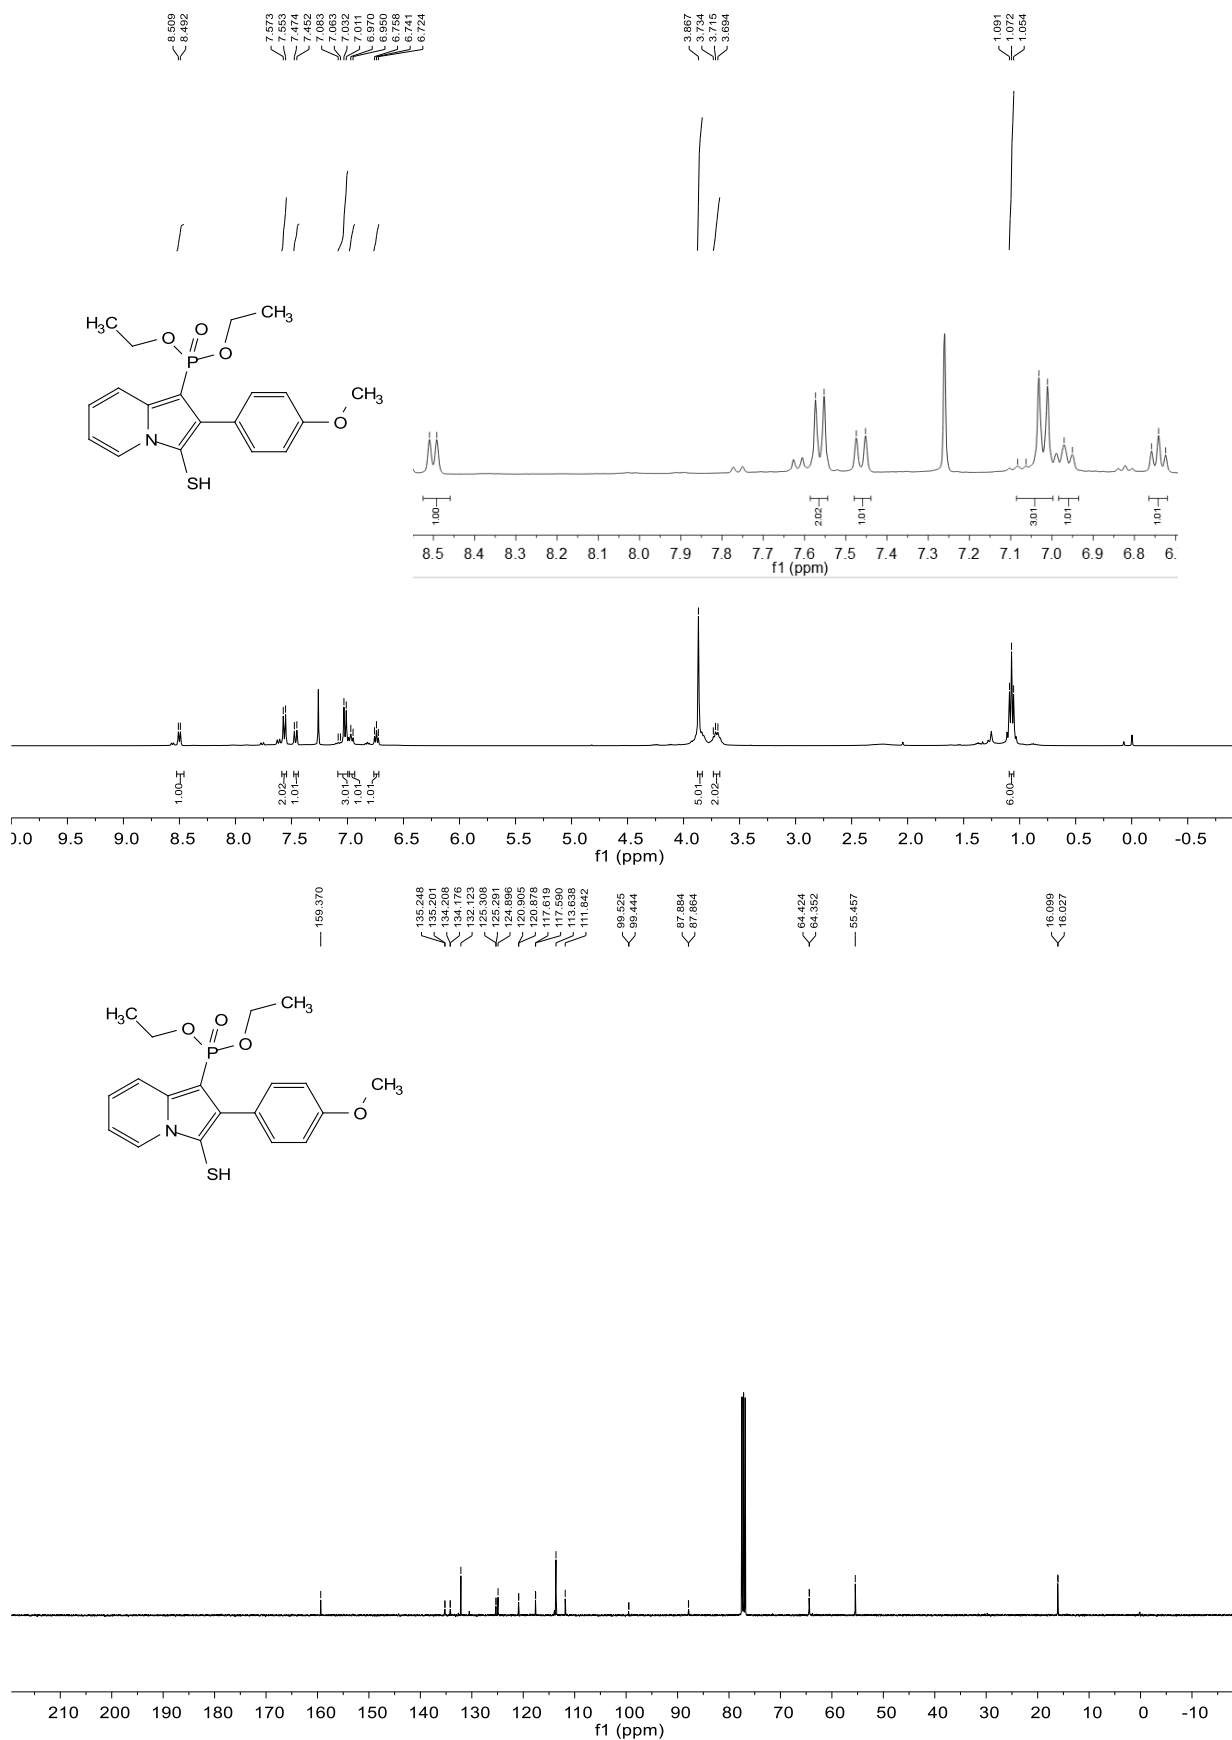

$^1\text{H}$  NMR (400 MHz,  $\text{CDCl}_3$ ),  $^{13}\text{C}$  NMR (100 MHz,  $\text{CDCl}_3$ ) spectrum of compound **4e**

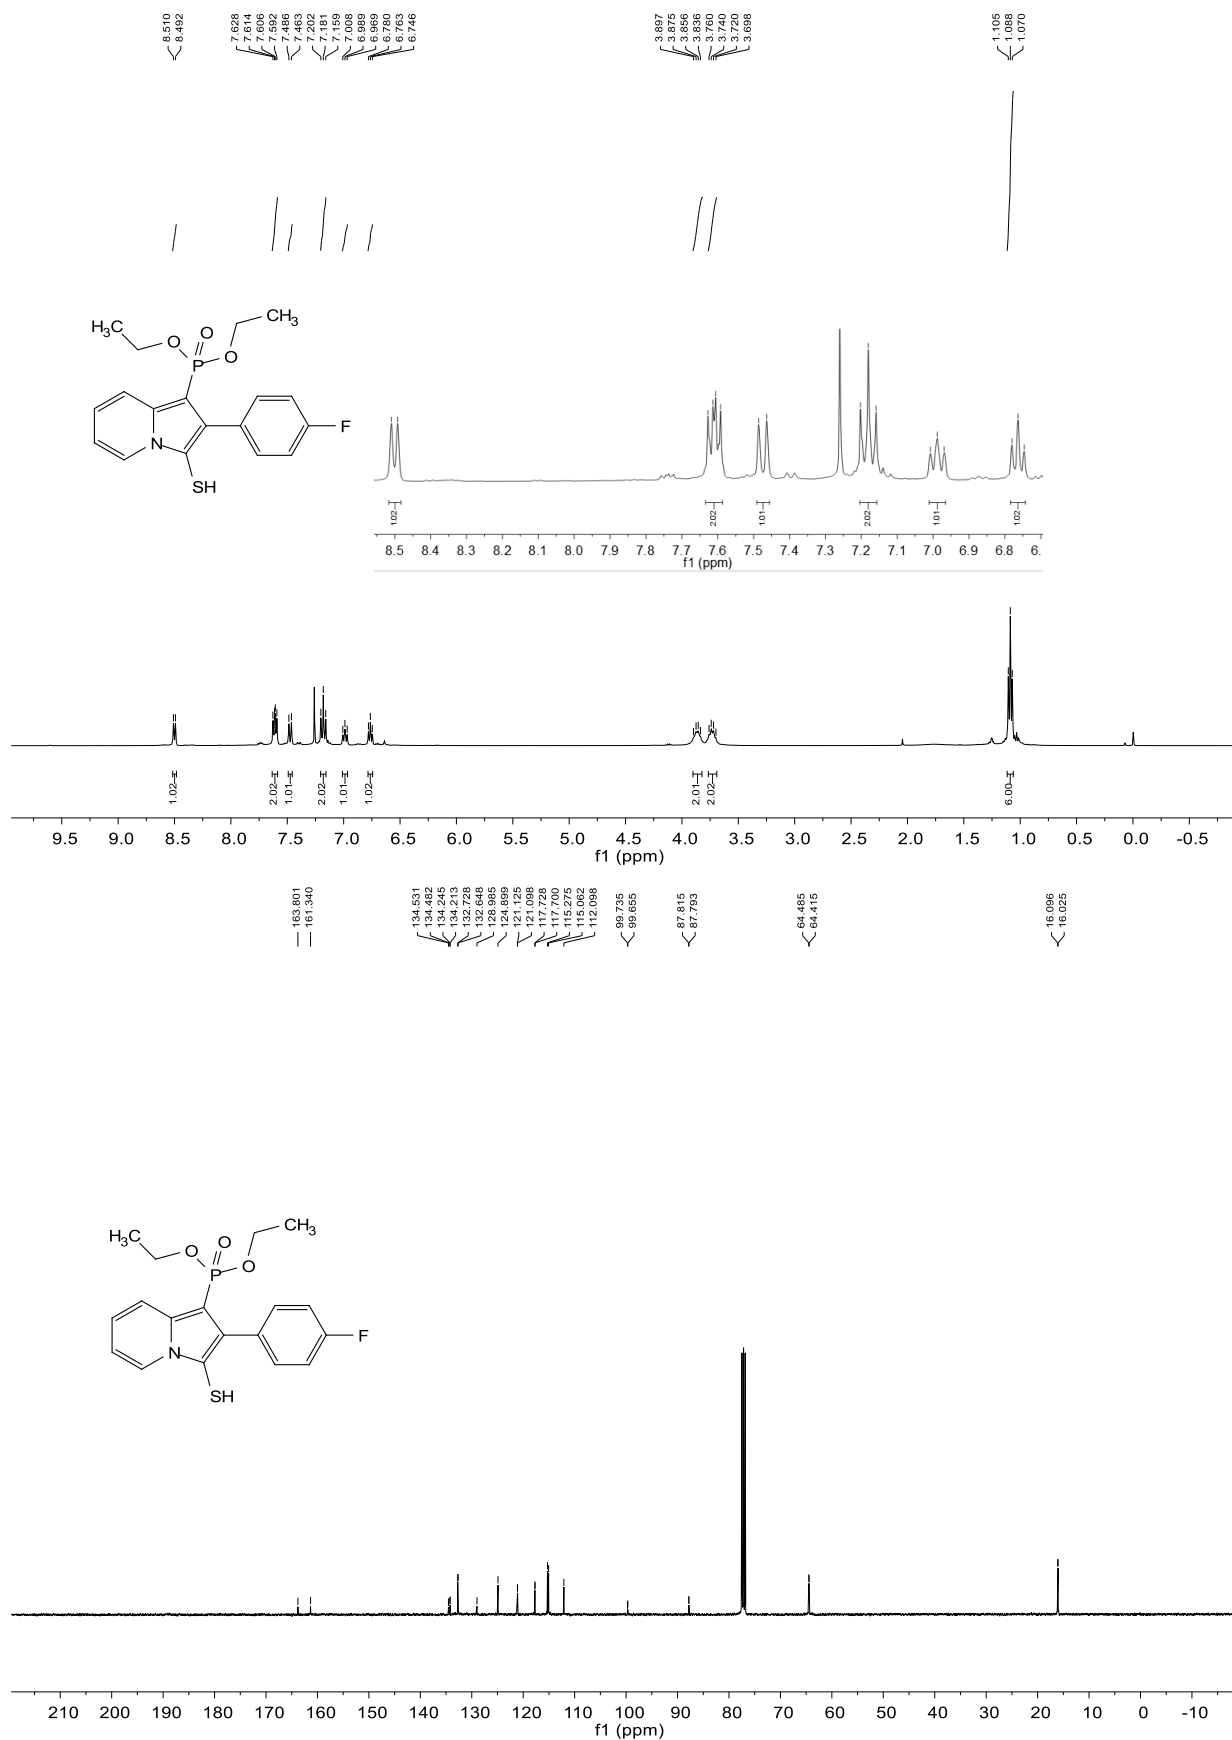



$^1\text{H}$  NMR (400 MHz,  $\text{CDCl}_3$ ),  $^{13}\text{C}$  NMR (100 MHz,  $\text{CDCl}_3$ ) spectrum of compound **4f**

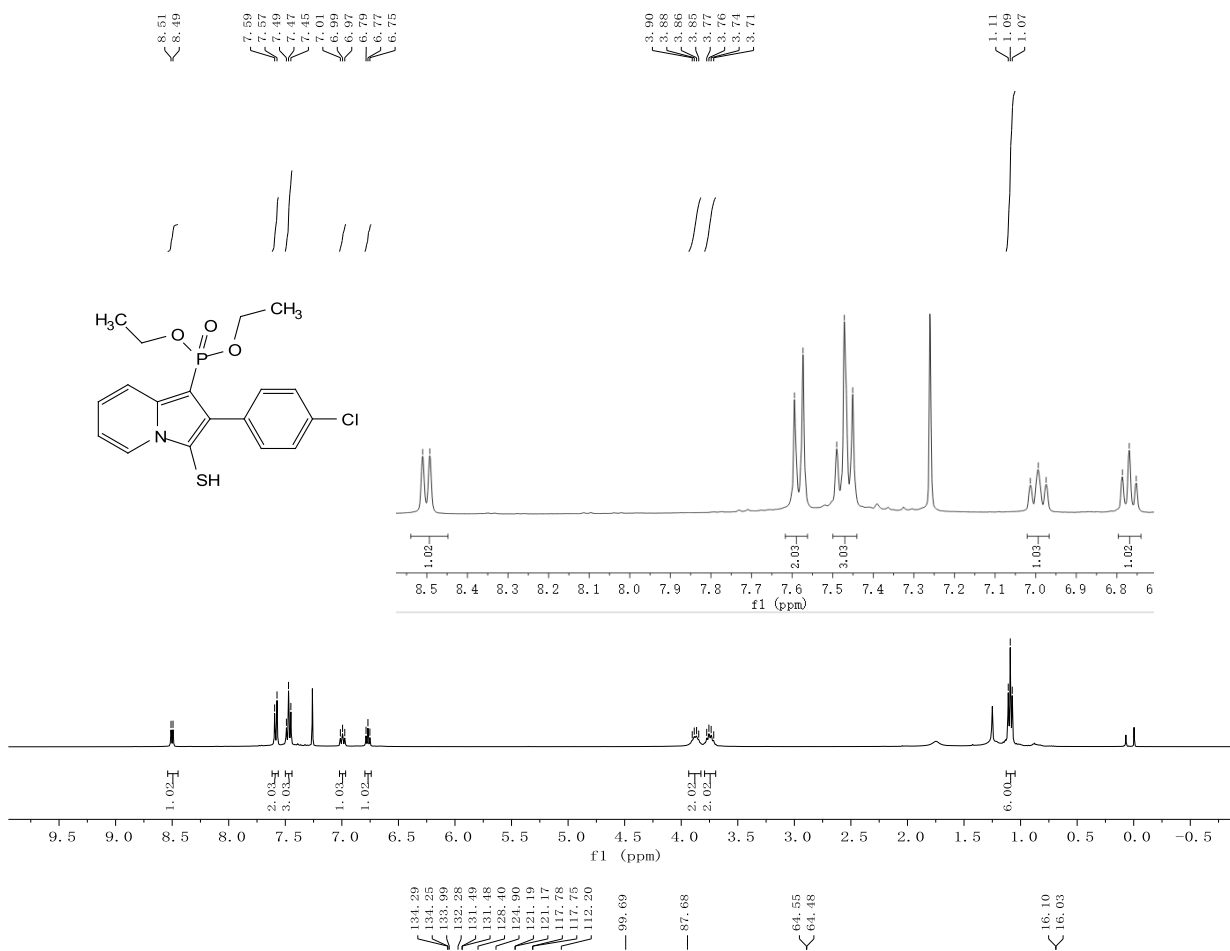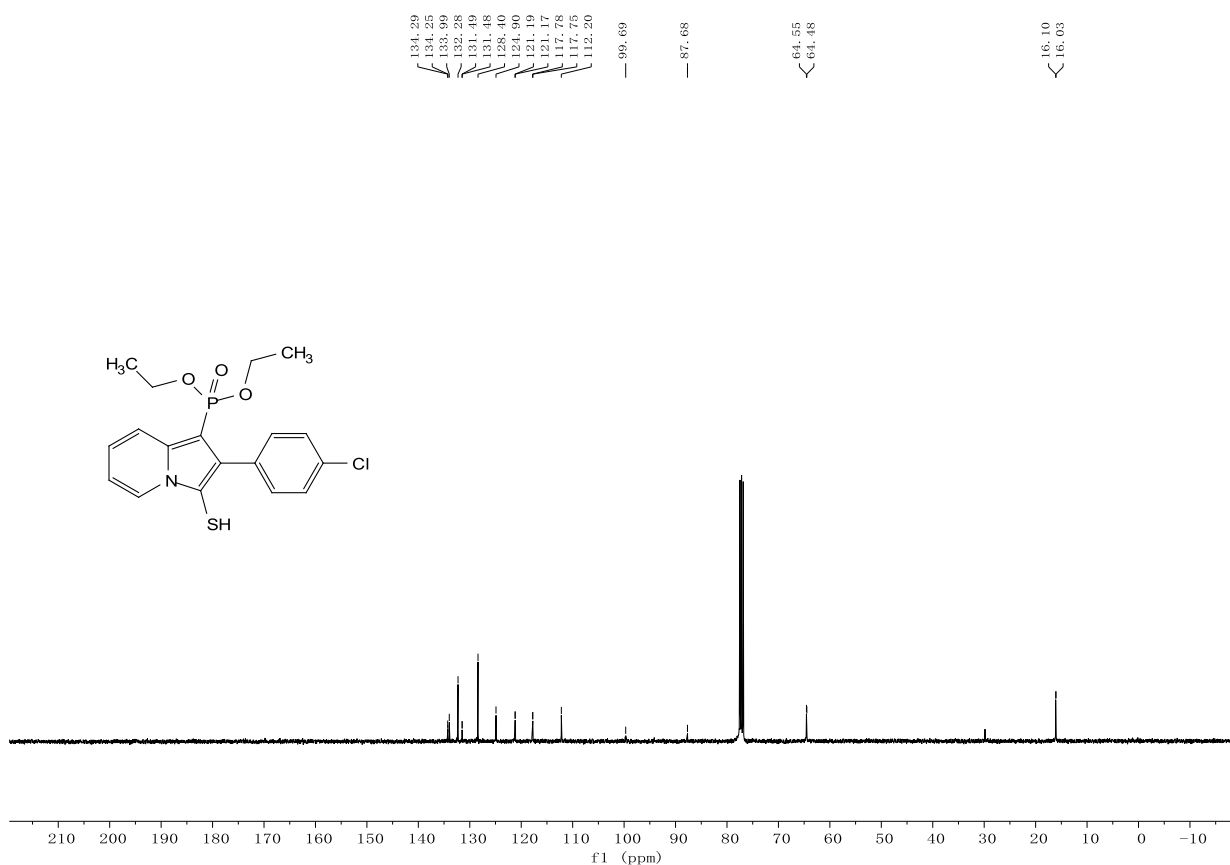

$^1\text{H}$  NMR (400 MHz,  $\text{CDCl}_3$ ),  $^{13}\text{C}$  NMR (100 MHz,  $\text{CDCl}_3$ ) spectrum of compound **4g**

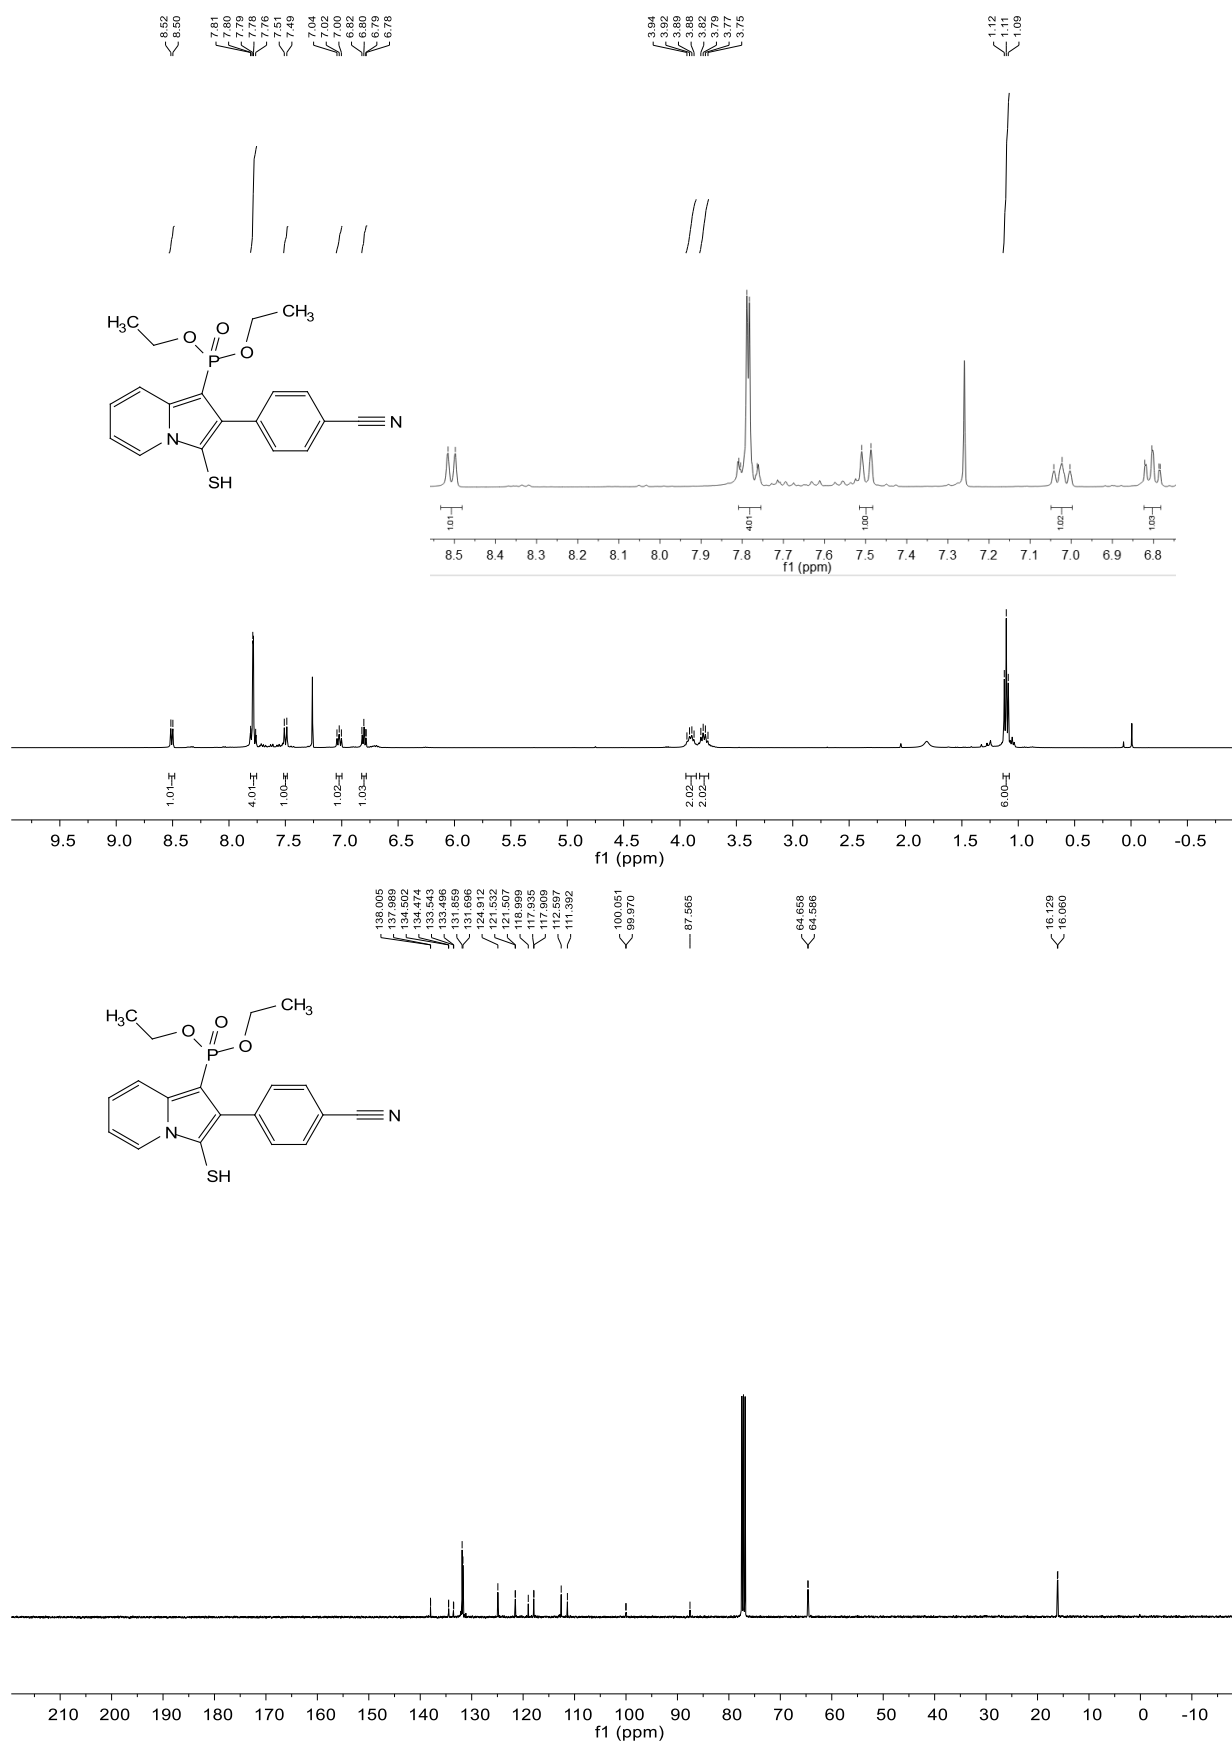

$^1\text{H}$  NMR (400 MHz,  $\text{CDCl}_3$ ),  $^{13}\text{C}$  NMR (100 MHz,  $\text{CDCl}_3$ ) spectrum of compound **4h**

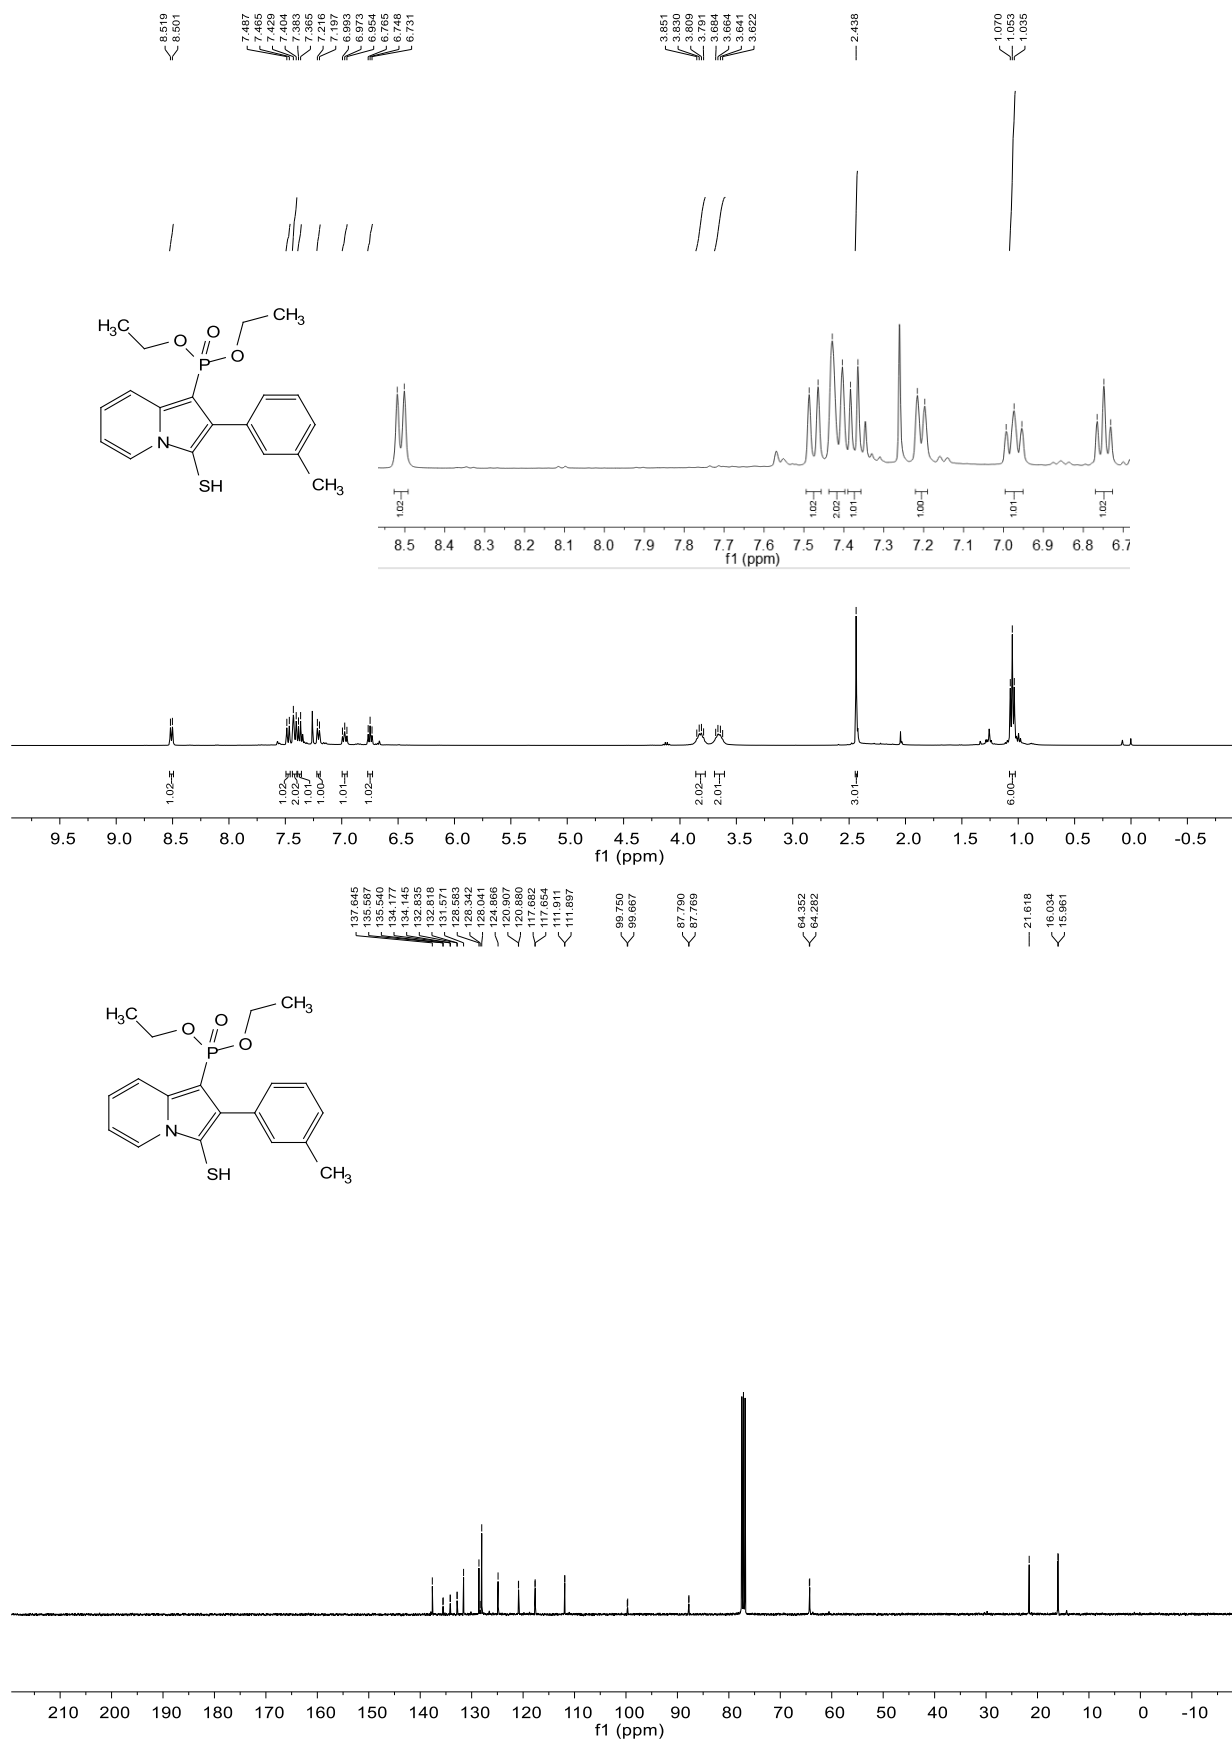

$^1\text{H}$  NMR (400 MHz,  $\text{CDCl}_3$ ),  $^{13}\text{C}$  NMR (100 MHz,  $\text{CDCl}_3$ ) spectrum of compound **4i**

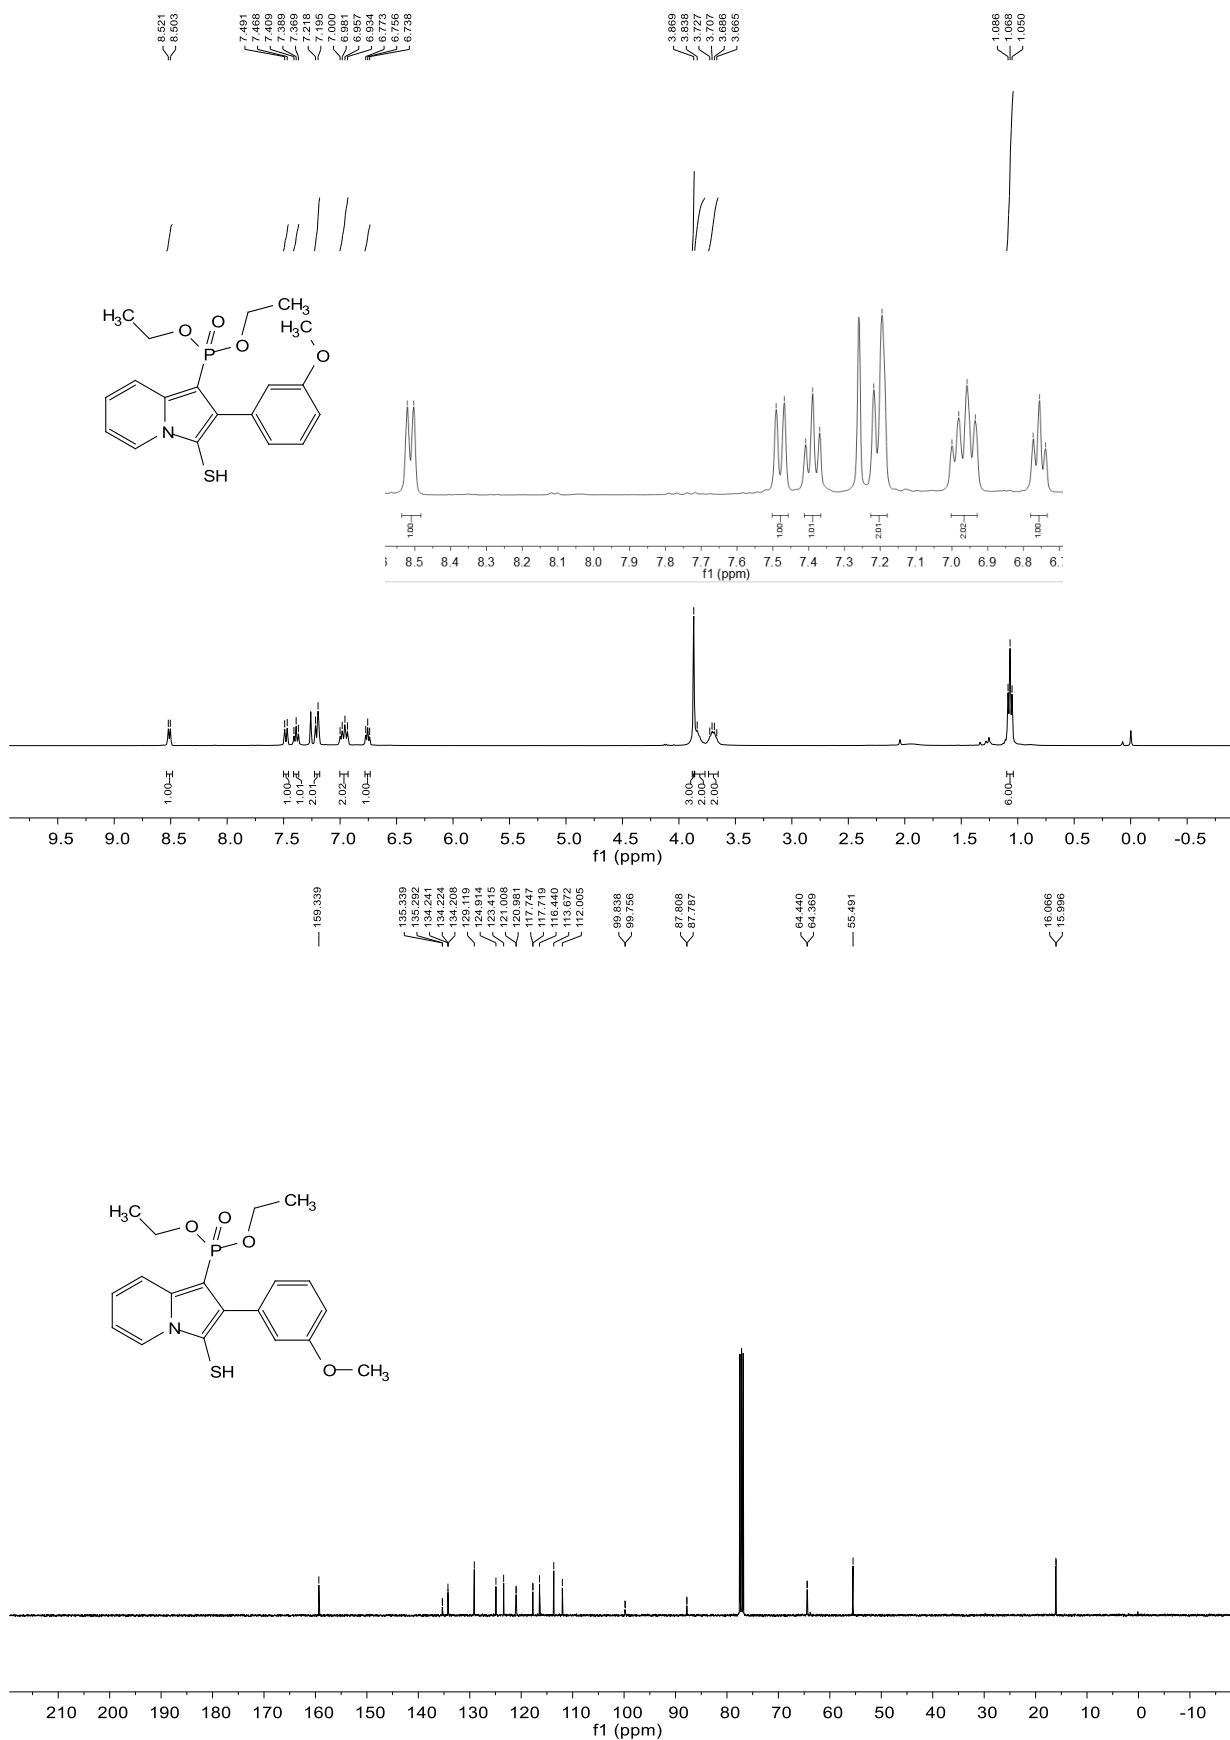

$^1\text{H}$  NMR (400 MHz,  $\text{CDCl}_3$ ),  $^{13}\text{C}$  NMR (100 MHz,  $\text{CDCl}_3$ ) spectrum of compound **4j**

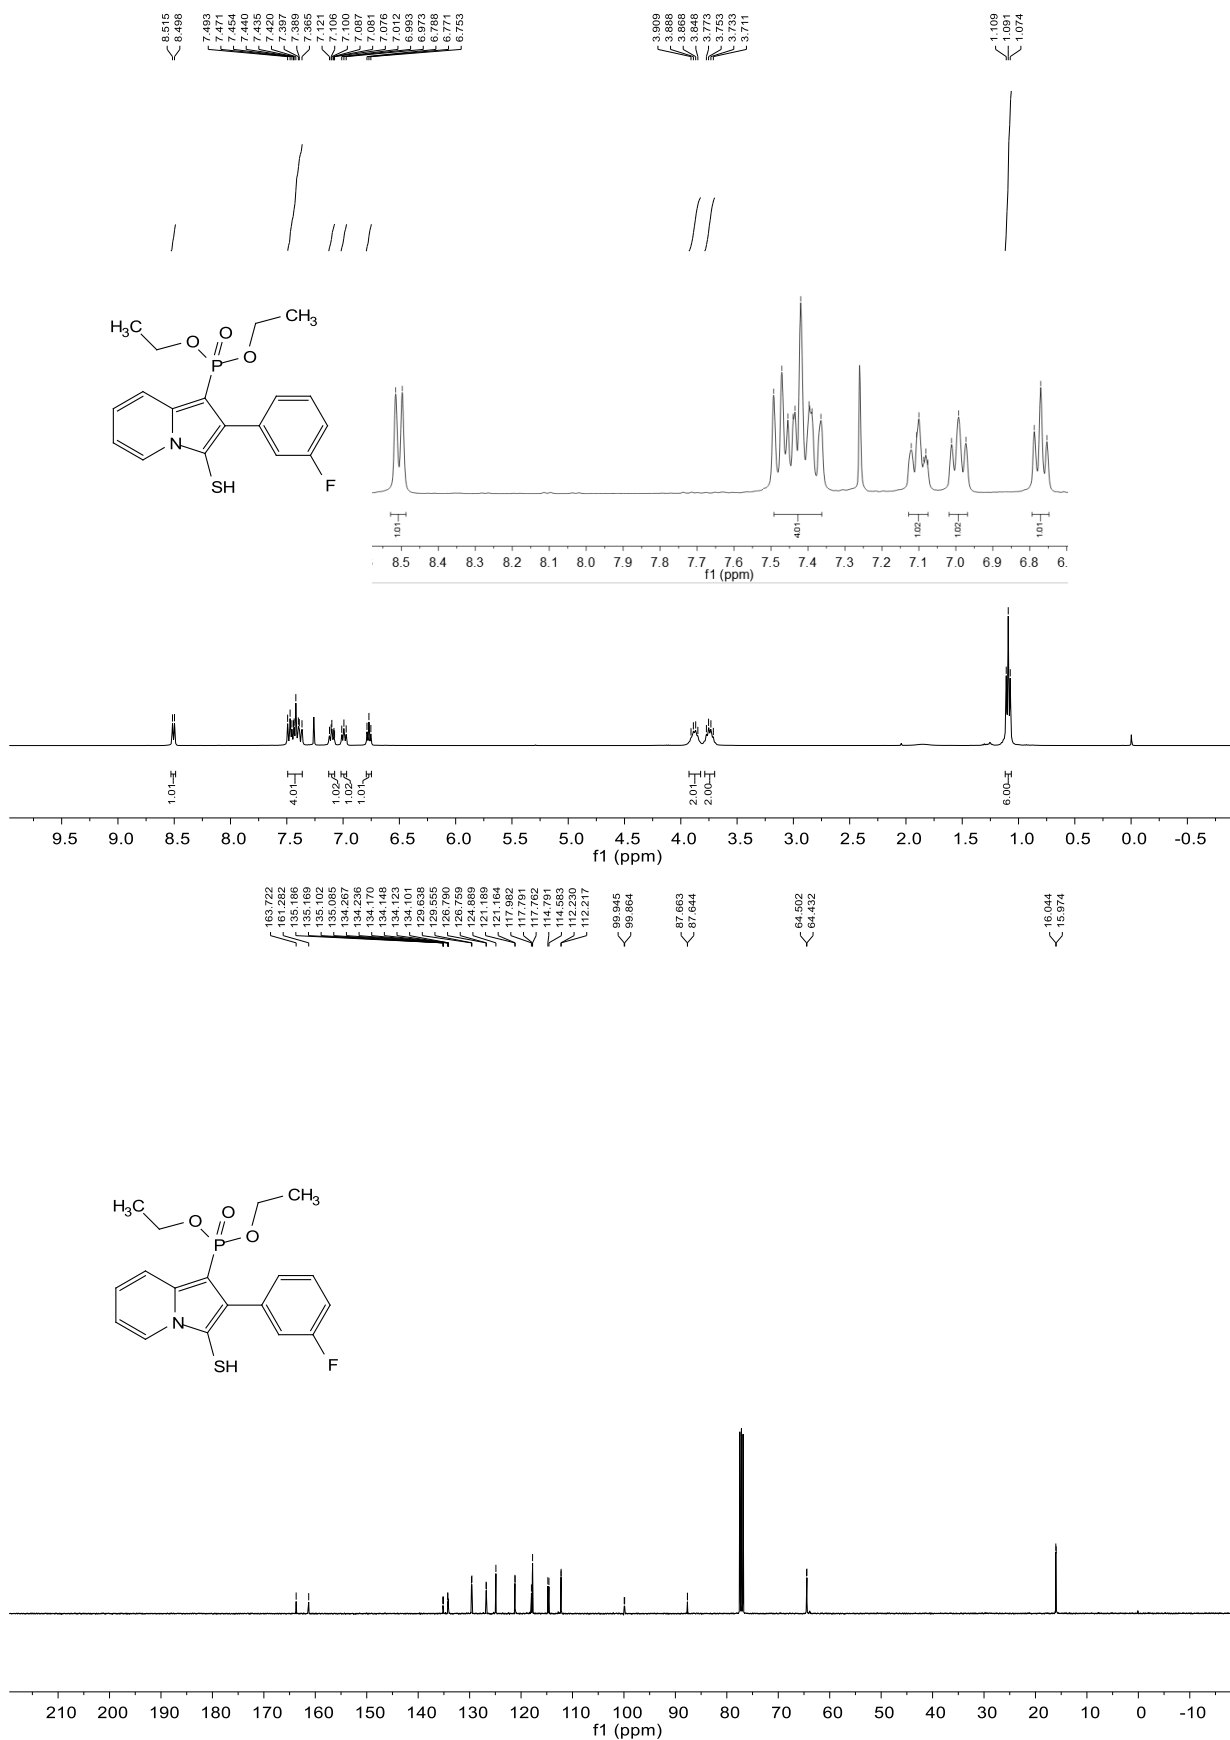

$^1\text{H}$  NMR (400 MHz,  $\text{CDCl}_3$ ),  $^{13}\text{C}$  NMR (100 MHz,  $\text{CDCl}_3$ ) and  $^{31}\text{P}$  NMR (162 MHz,  $\text{CDCl}_3$ ) spectrum of compound **4k**

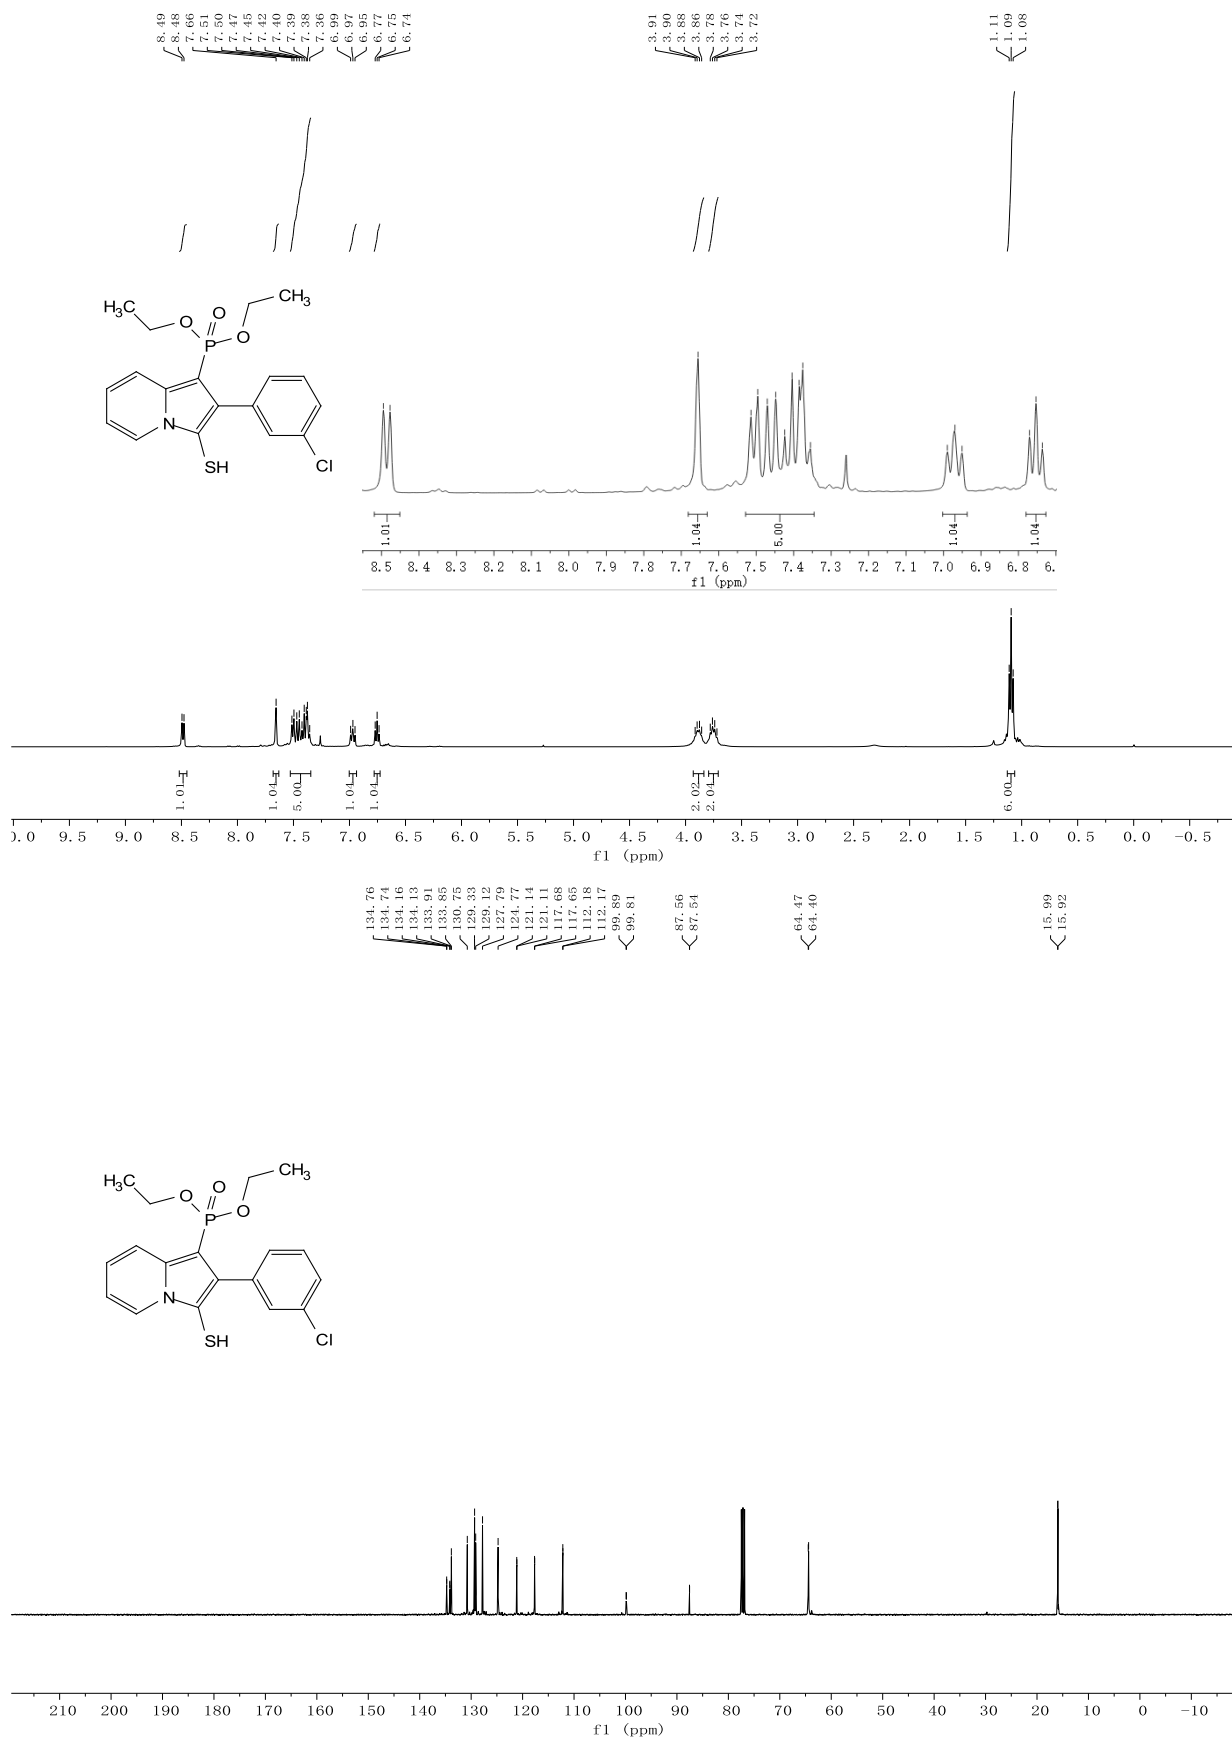

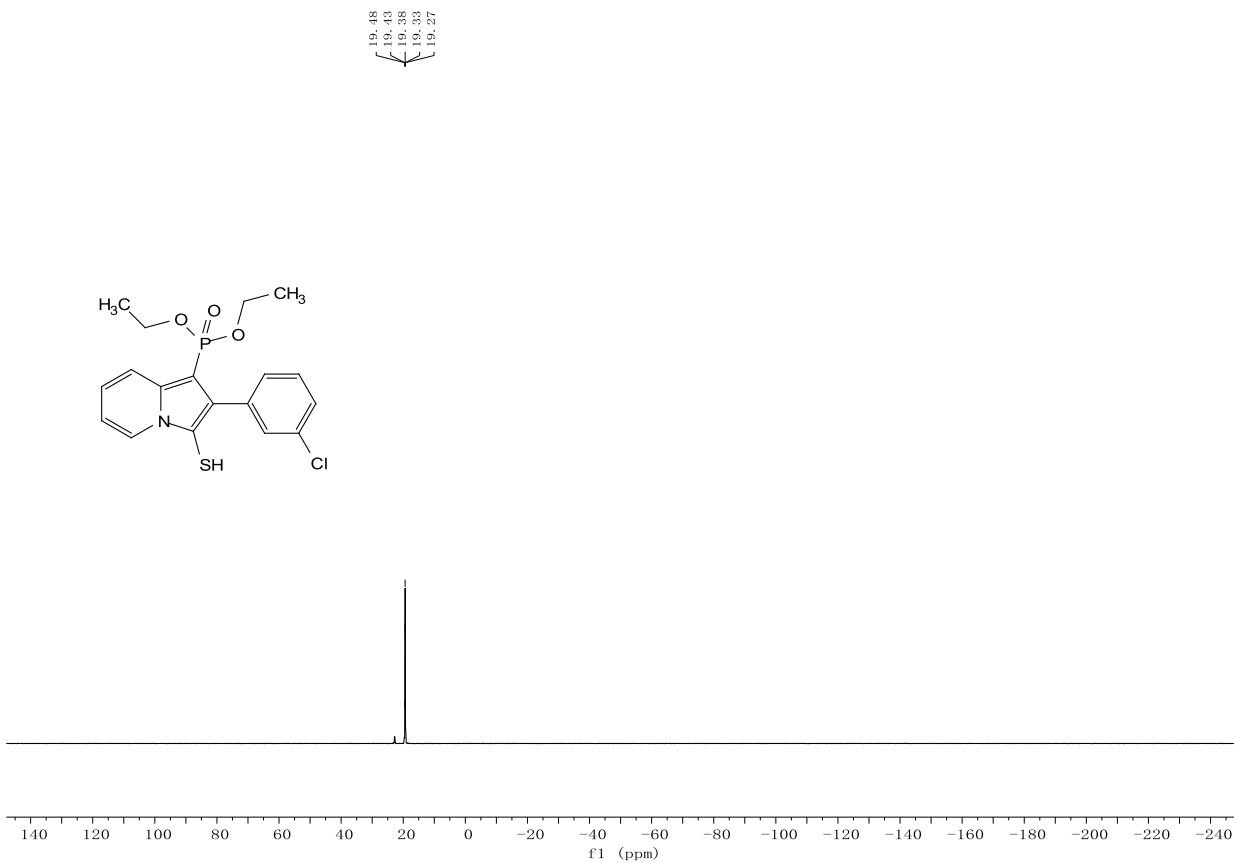

$^1\text{H}$  NMR (400 MHz,  $\text{CDCl}_3$ ),  $^{13}\text{C}$  NMR (100 MHz,  $\text{CDCl}_3$ ) spectrum of compound **4I**

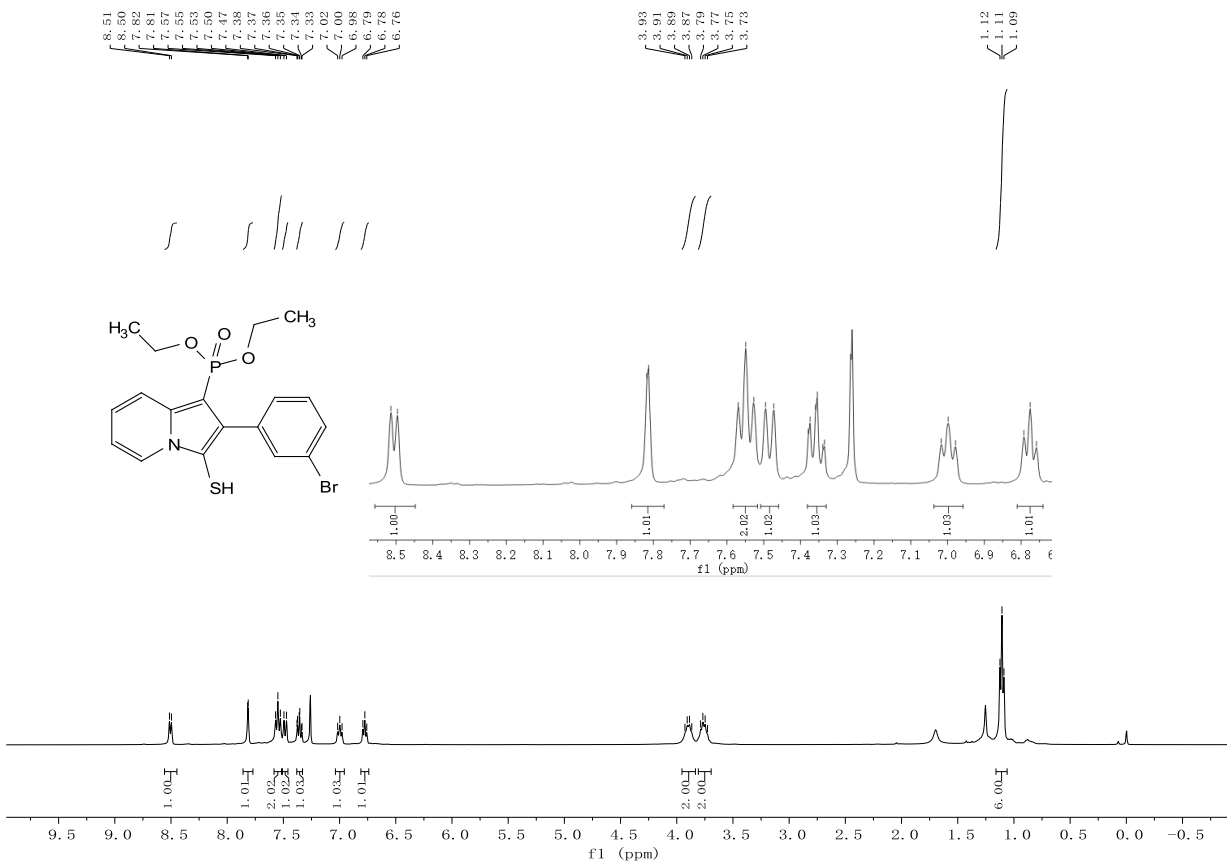

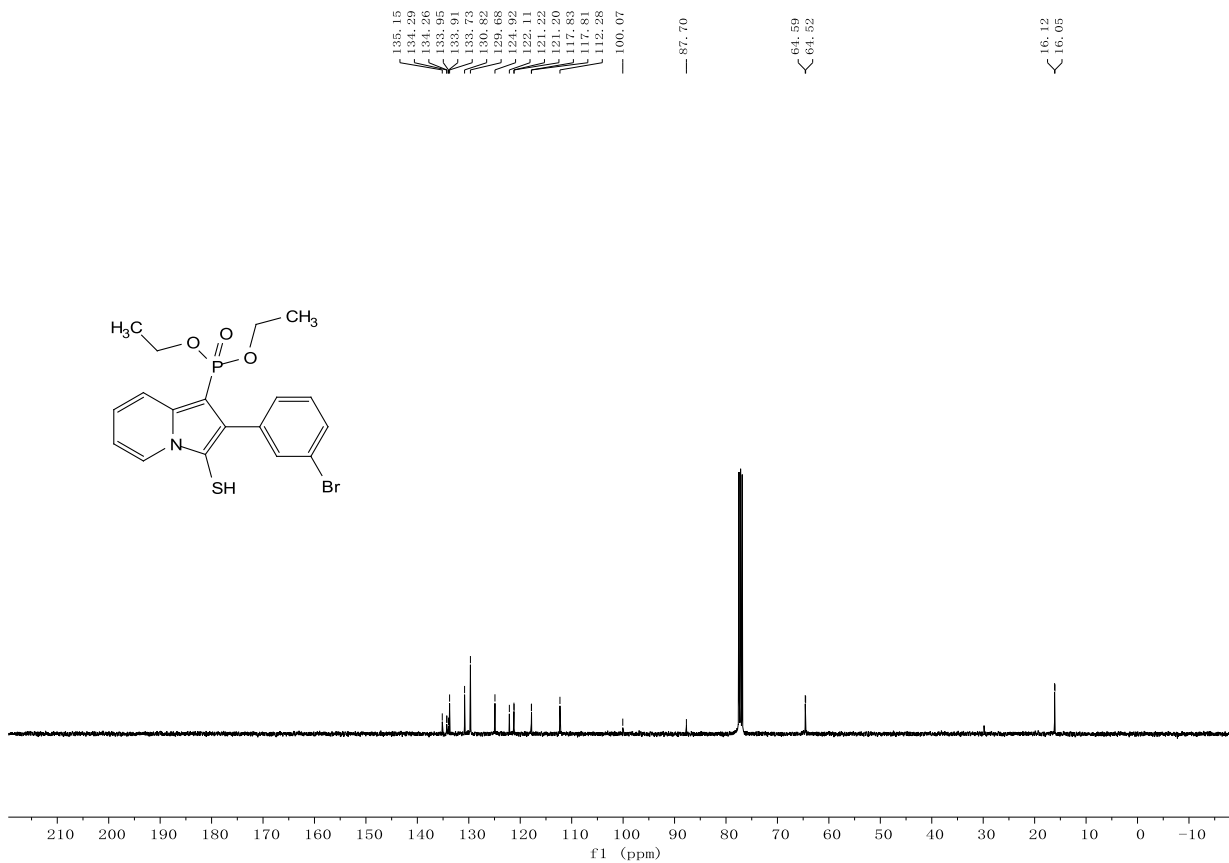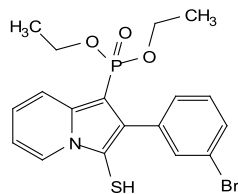

$^1\text{H}$  NMR (400 MHz,  $\text{CDCl}_3$ ),  $^{13}\text{C}$  NMR (100 MHz,  $\text{CDCl}_3$ ) and  $^{31}\text{P}$  NMR (162 MHz,  $\text{CDCl}_3$ ) spectrum of compound **4m**

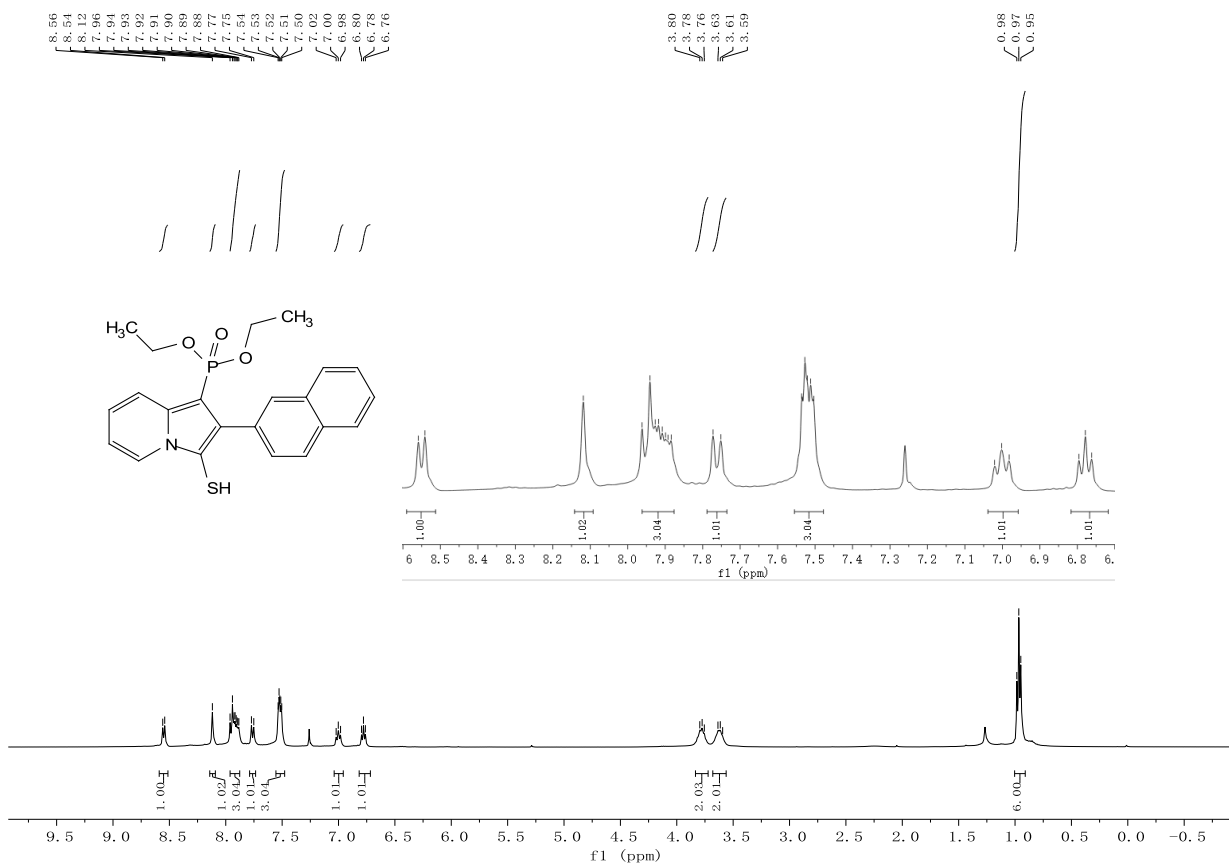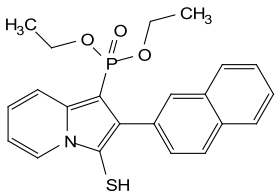



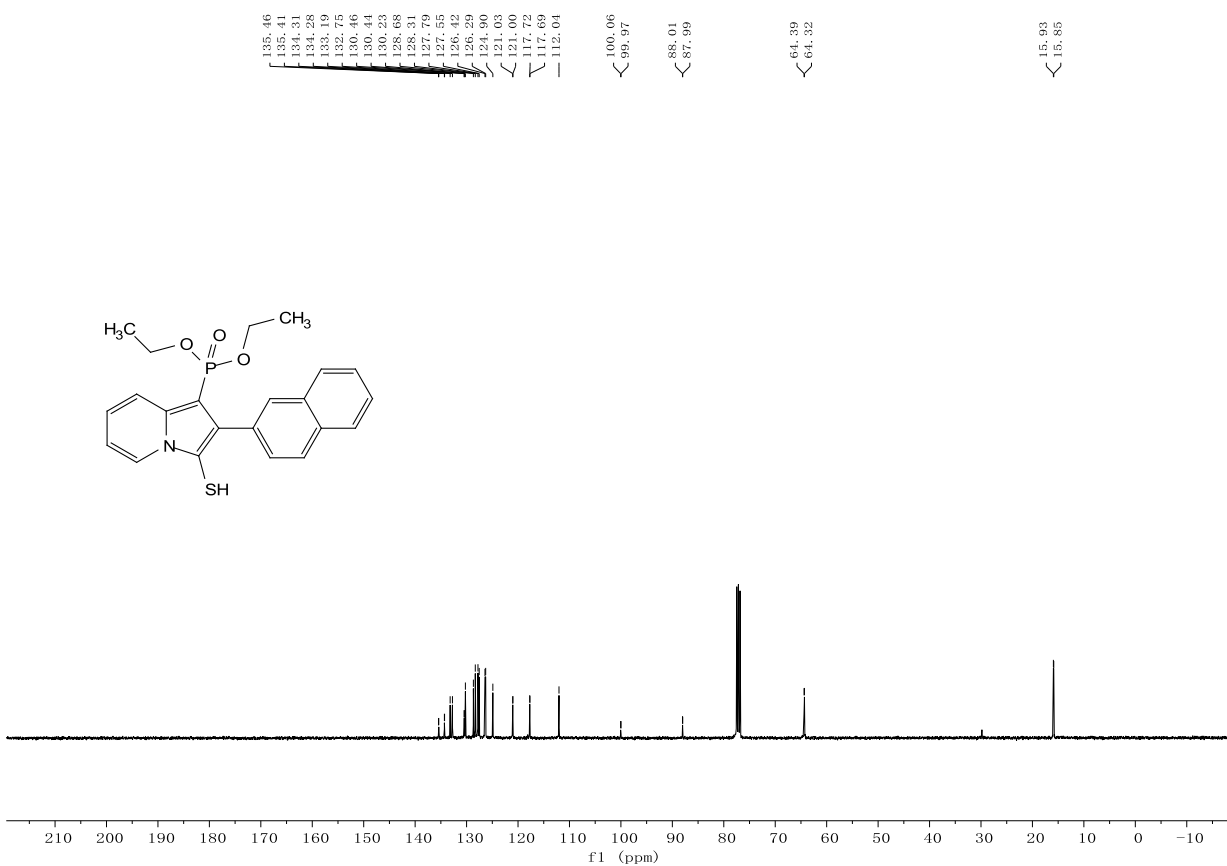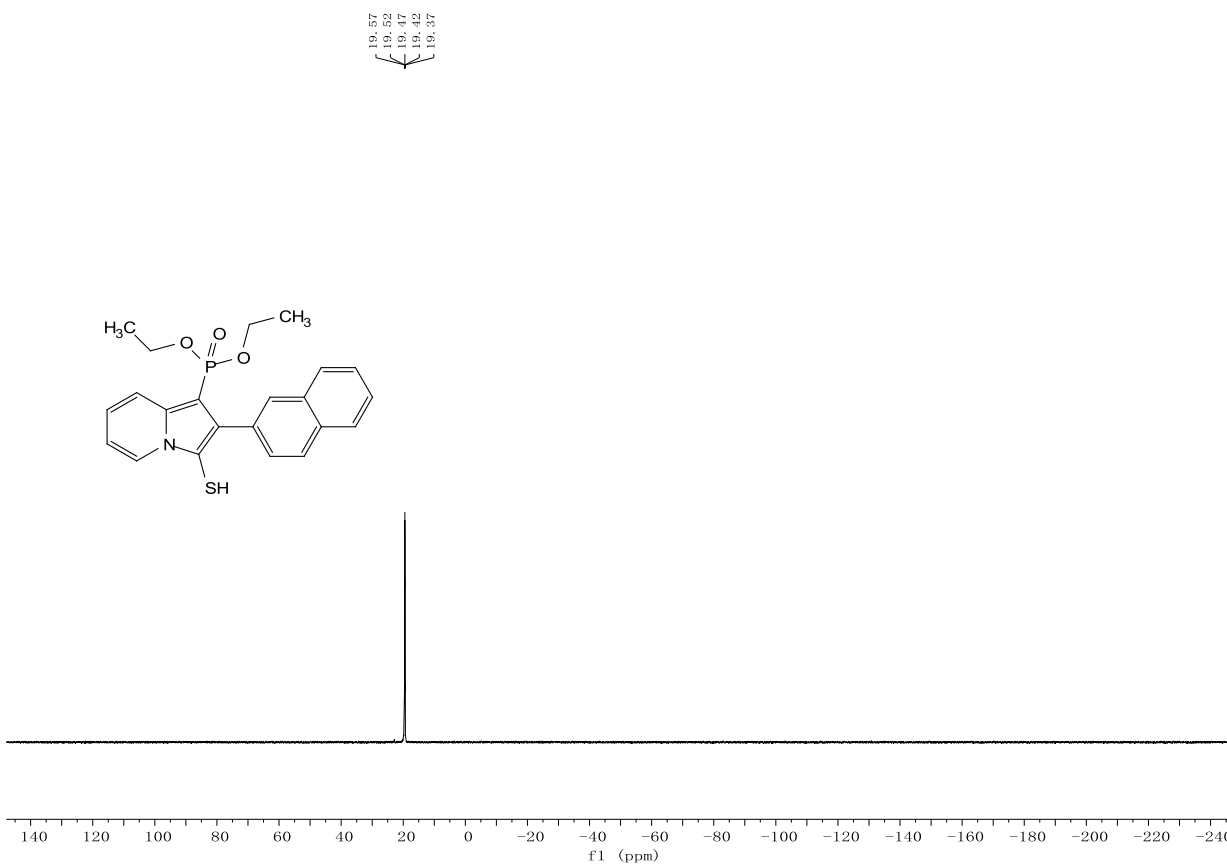

$^1\text{H}$  NMR (400 MHz,  $\text{CDCl}_3$ ),  $^{13}\text{C}$  NMR (100 MHz,  $\text{CDCl}_3$ ) spectrum of compound **4n**

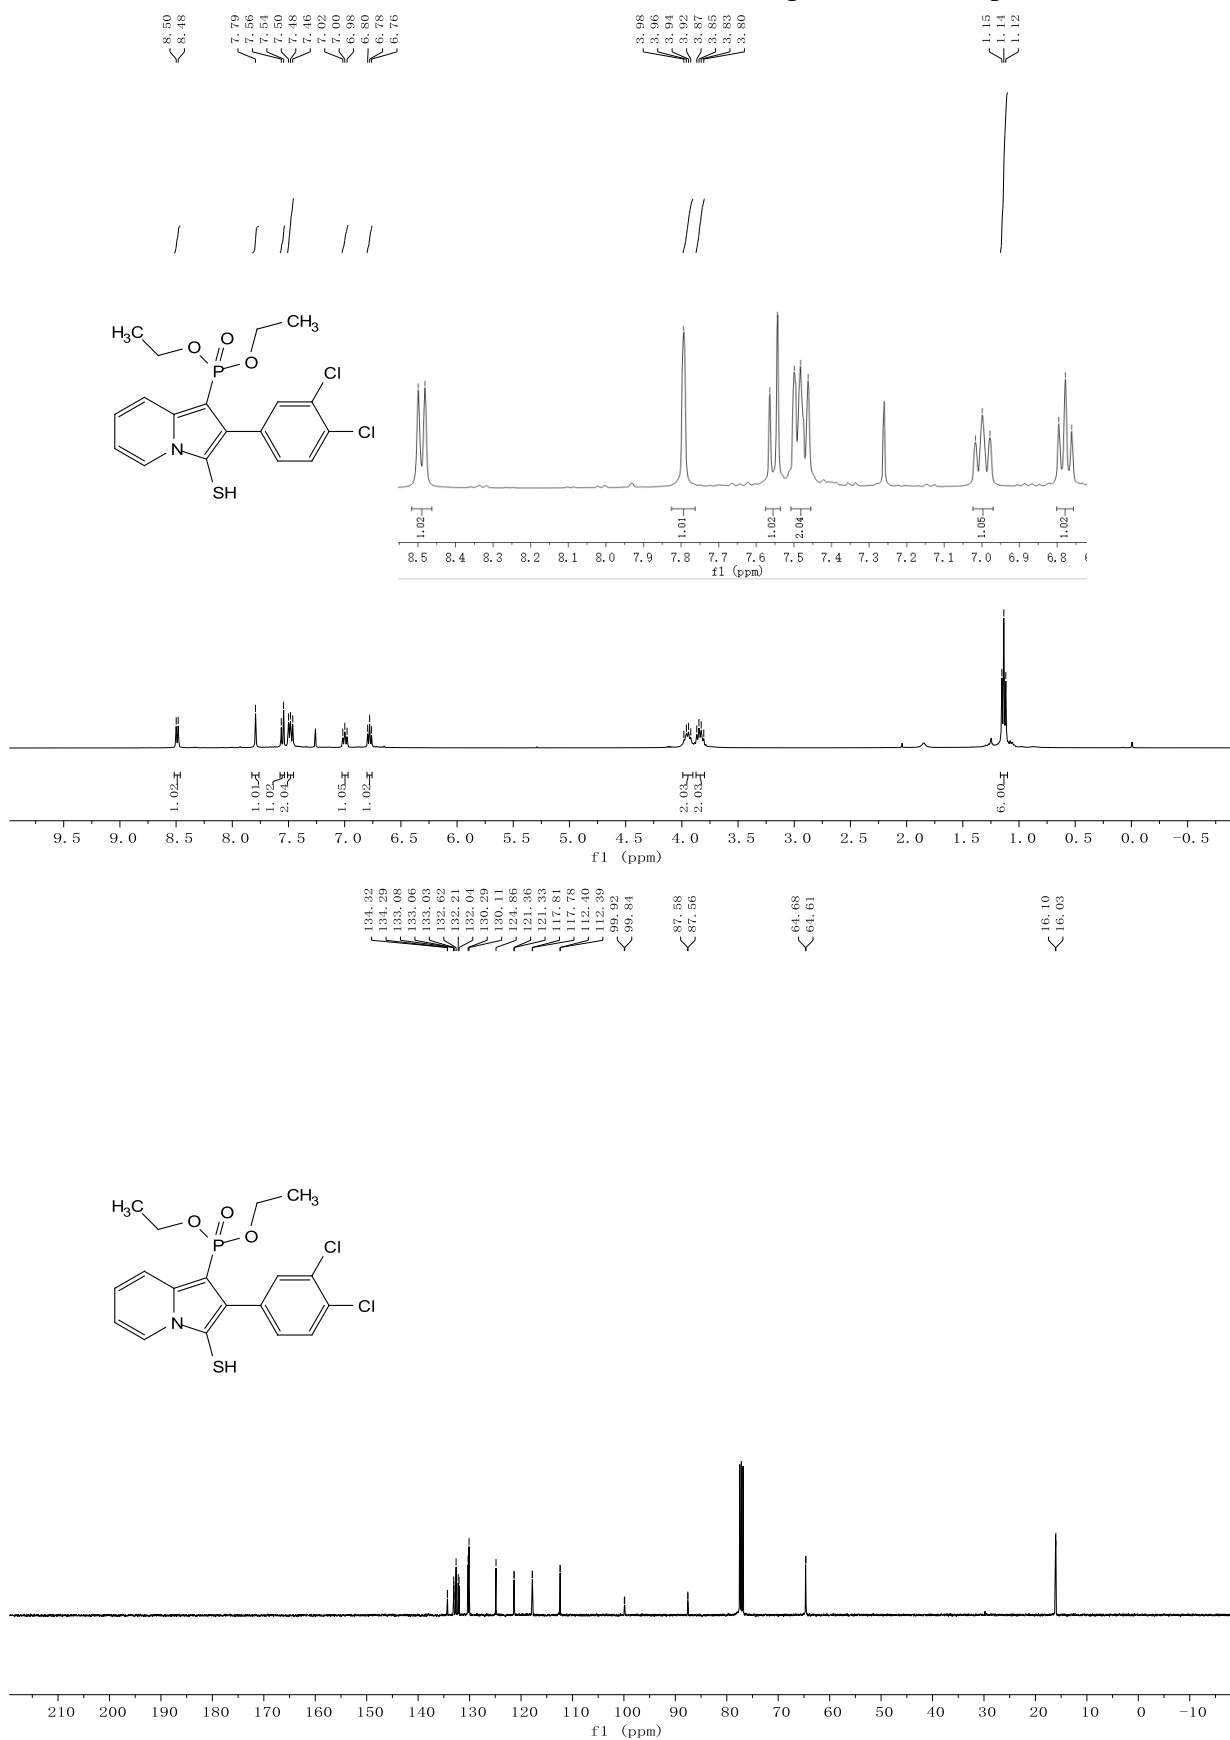

$^1\text{H}$  NMR (400 MHz,  $\text{CDCl}_3$ ),  $^{13}\text{C}$  NMR (100 MHz,  $\text{CDCl}_3$ ) and  $^{31}\text{P}$  NMR (162 MHz,  $\text{CDCl}_3$ ) spectrum of compound **4o**

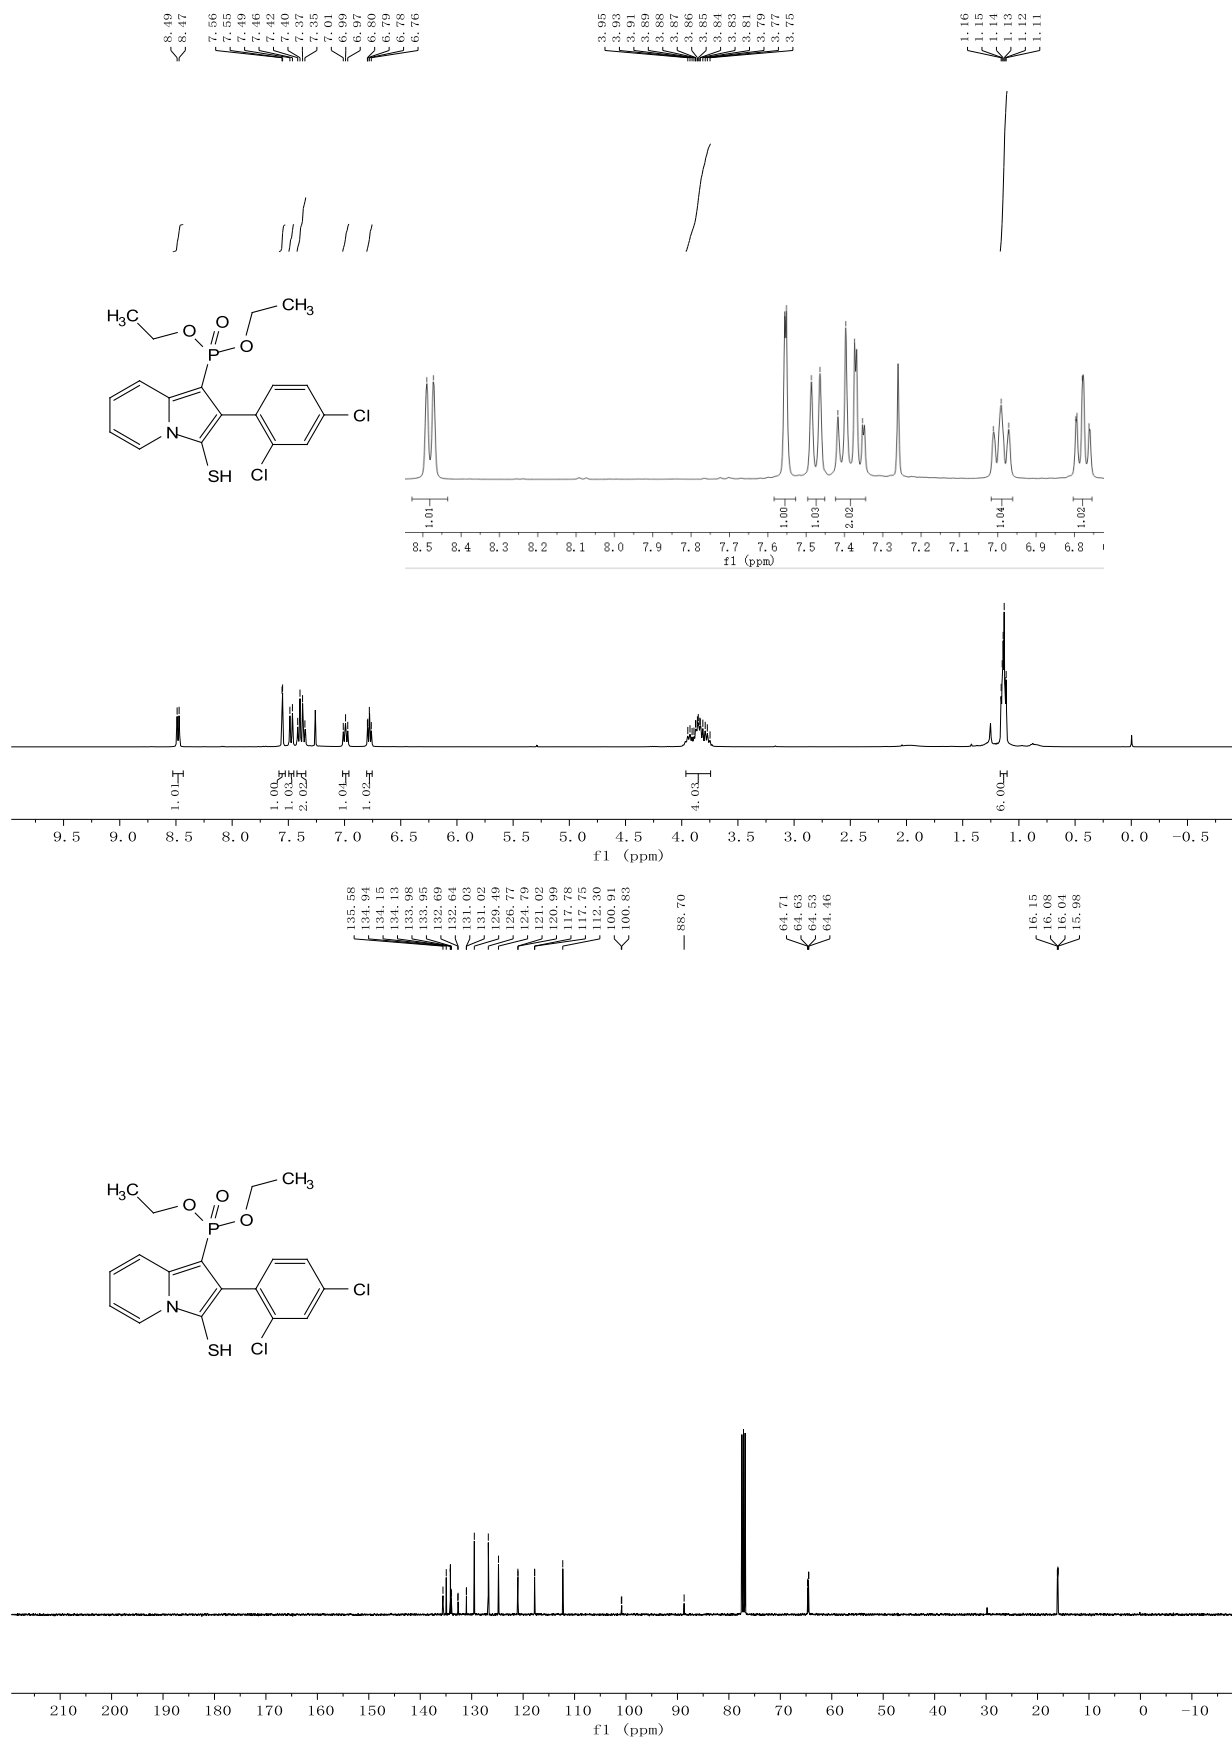

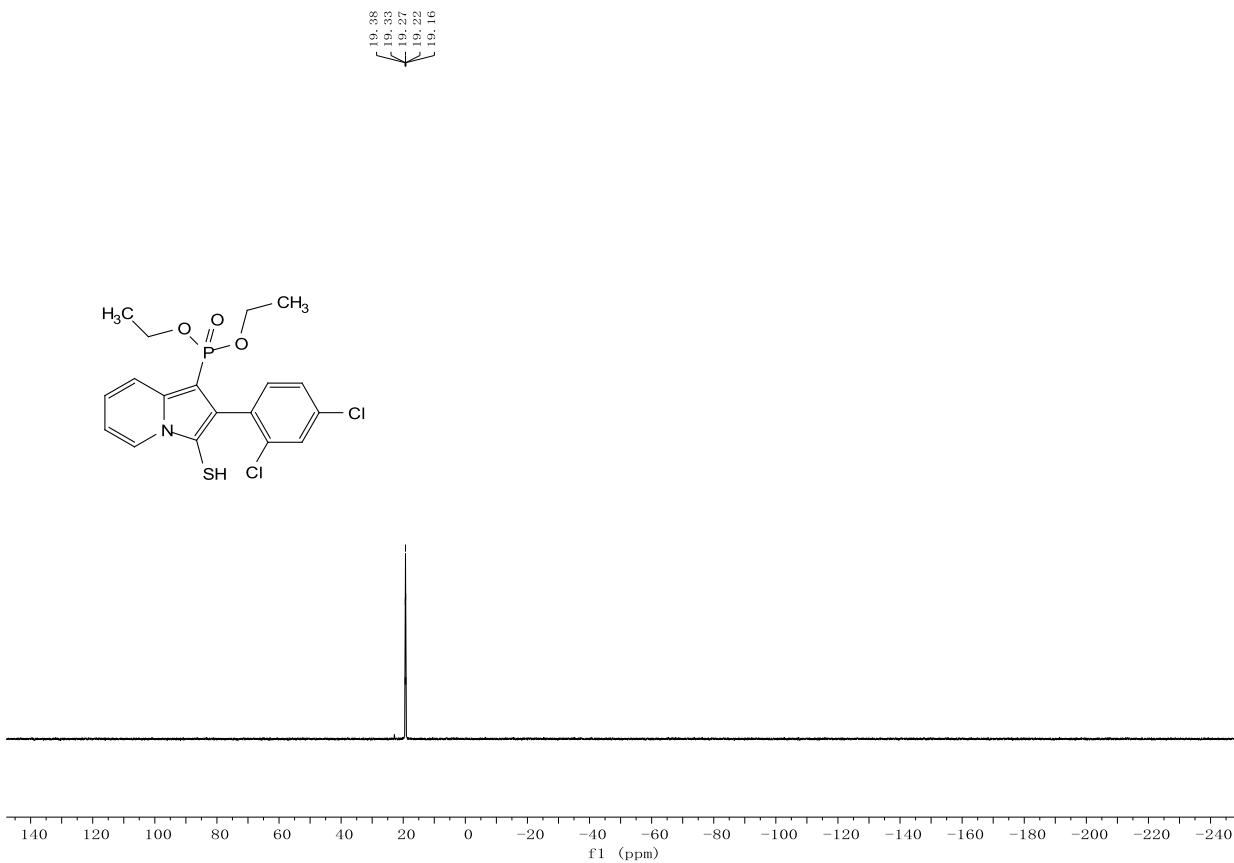

$^1\text{H}$  NMR (400 MHz,  $\text{CDCl}_3$ ),  $^{13}\text{C}$  NMR (100 MHz,  $\text{CDCl}_3$ ) spectrum of compound **4p**

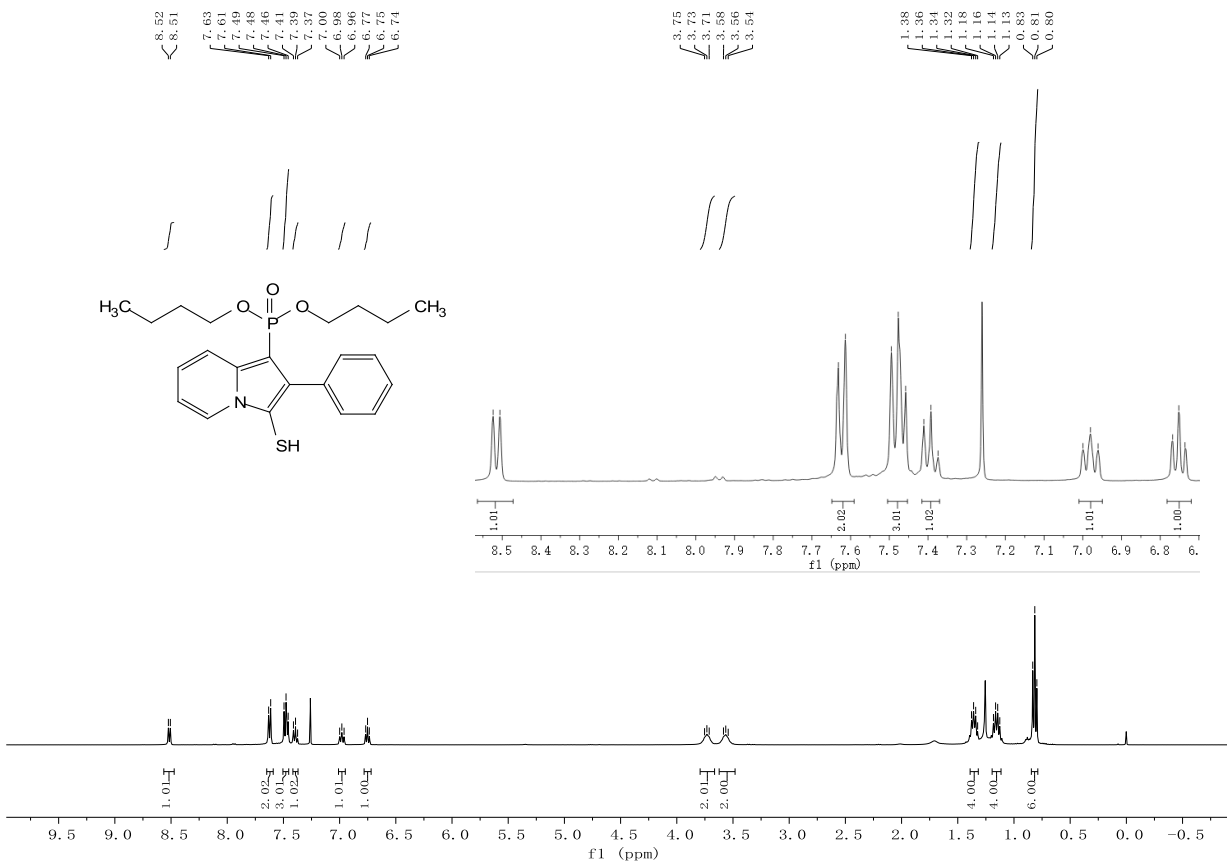

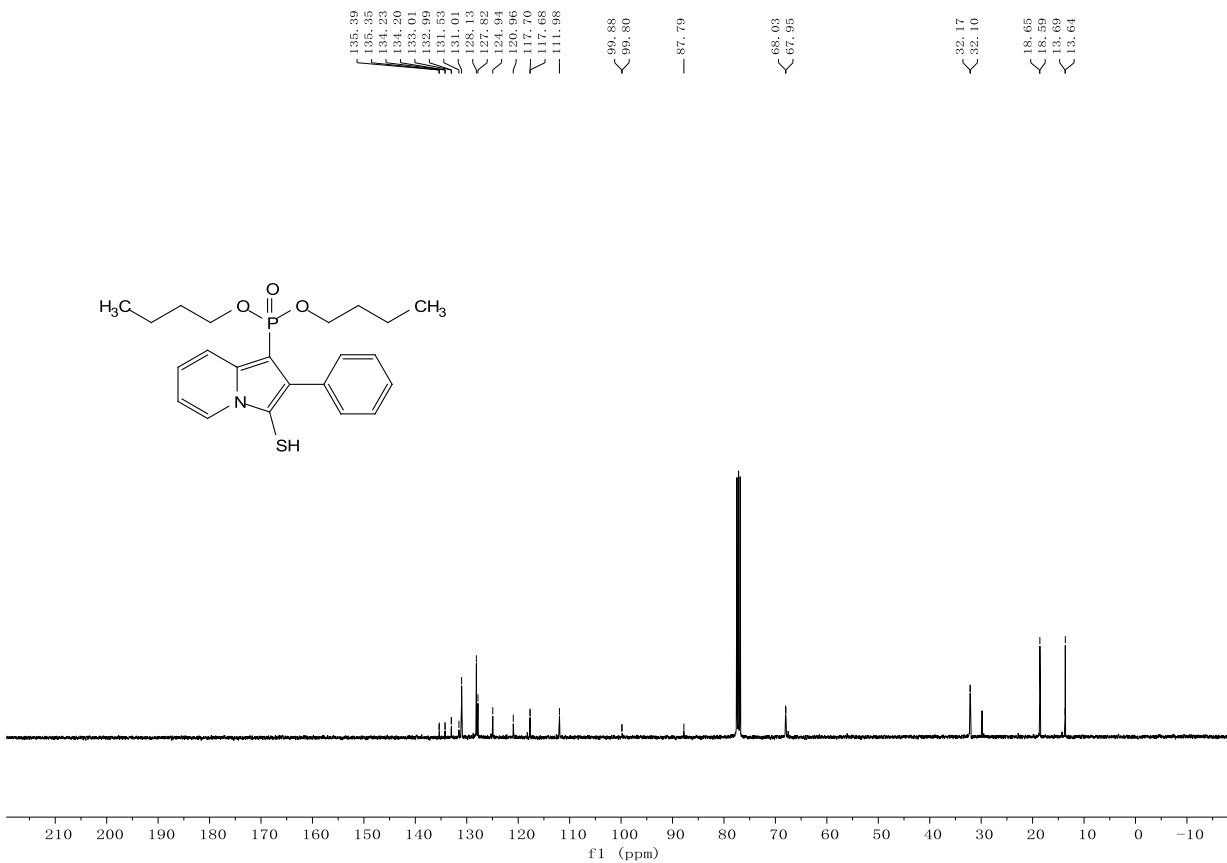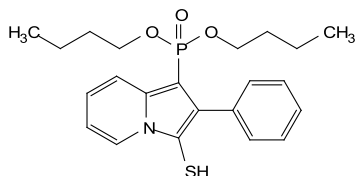

$^1\text{H}$  NMR (400 MHz,  $\text{CDCl}_3$ ),  $^{13}\text{C}$  NMR (100 MHz,  $\text{CDCl}_3$ ) and  $^{31}\text{P}$  NMR (162 MHz,  $\text{CDCl}_3$ ) spectrum of compound **4q**

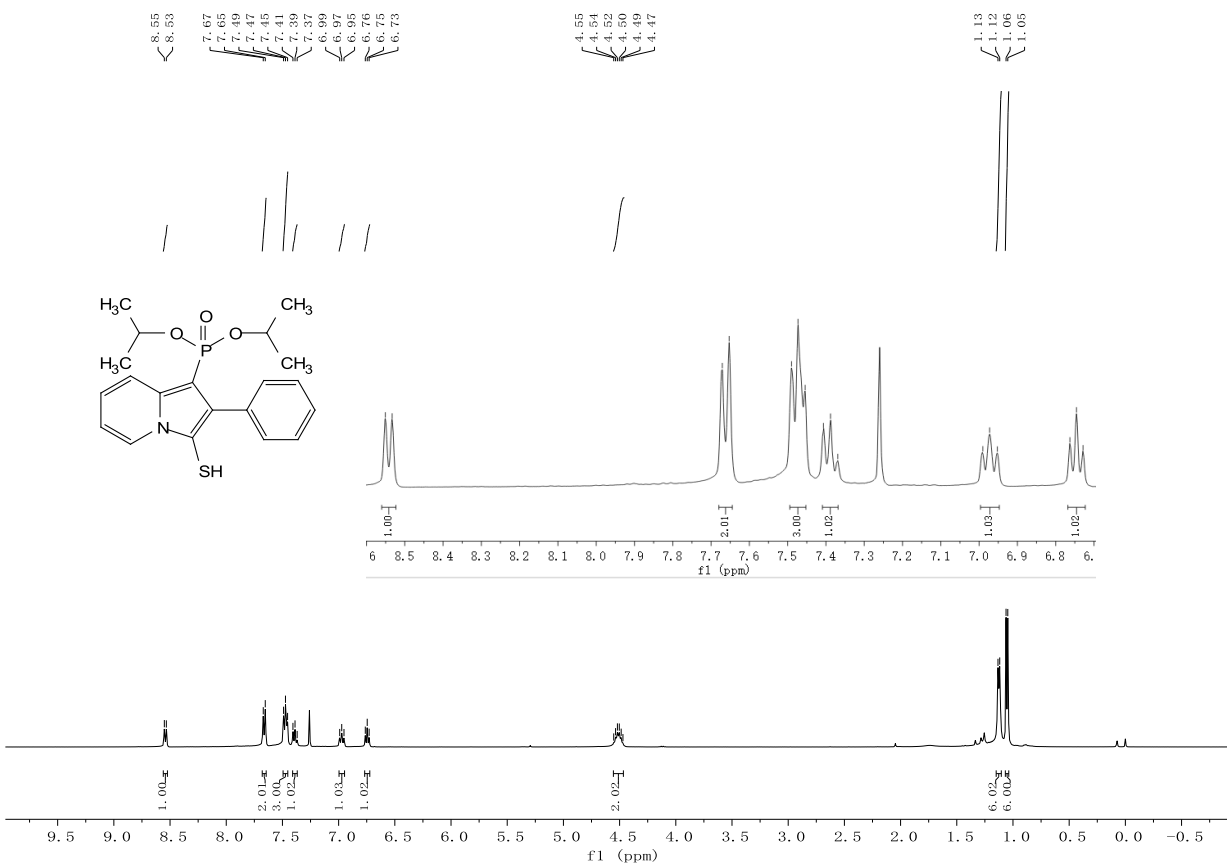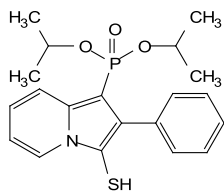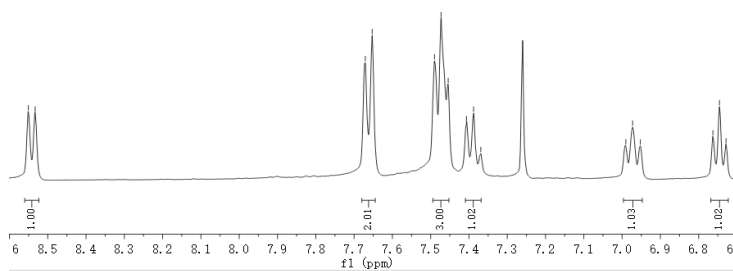

1335.44  
 1335.39  
 1334.13  
 1334.10  
 1333.07  
 1333.05  
 1331.12  
 1327.98  
 1325.29  
 120.88  
 120.85  
 117.60  
 117.57  
 111.74  
 100.56  
 100.48  
 87.76  
 74.11  
 74.03  
 23.80  
 23.75  
 23.56  
 23.50

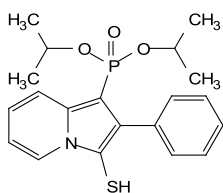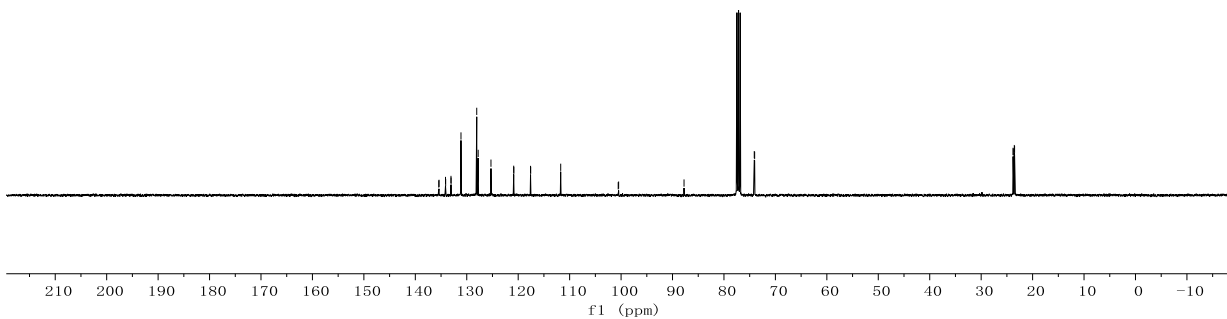

17.99  
 17.94  
 17.89

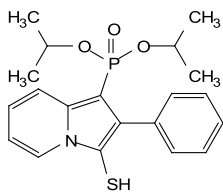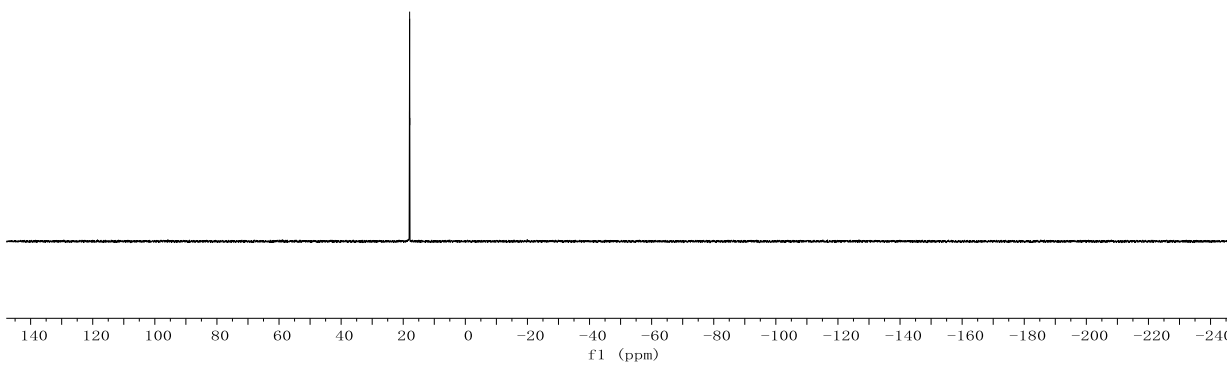

$^1\text{H}$  NMR (400 MHz,  $\text{CDCl}_3$ ),  $^{13}\text{C}$  NMR (100 MHz,  $\text{CDCl}_3$ ) and  $^{31}\text{P}$  NMR (162 MHz,  $\text{CDCl}_3$ ) spectrum of compound **5a**

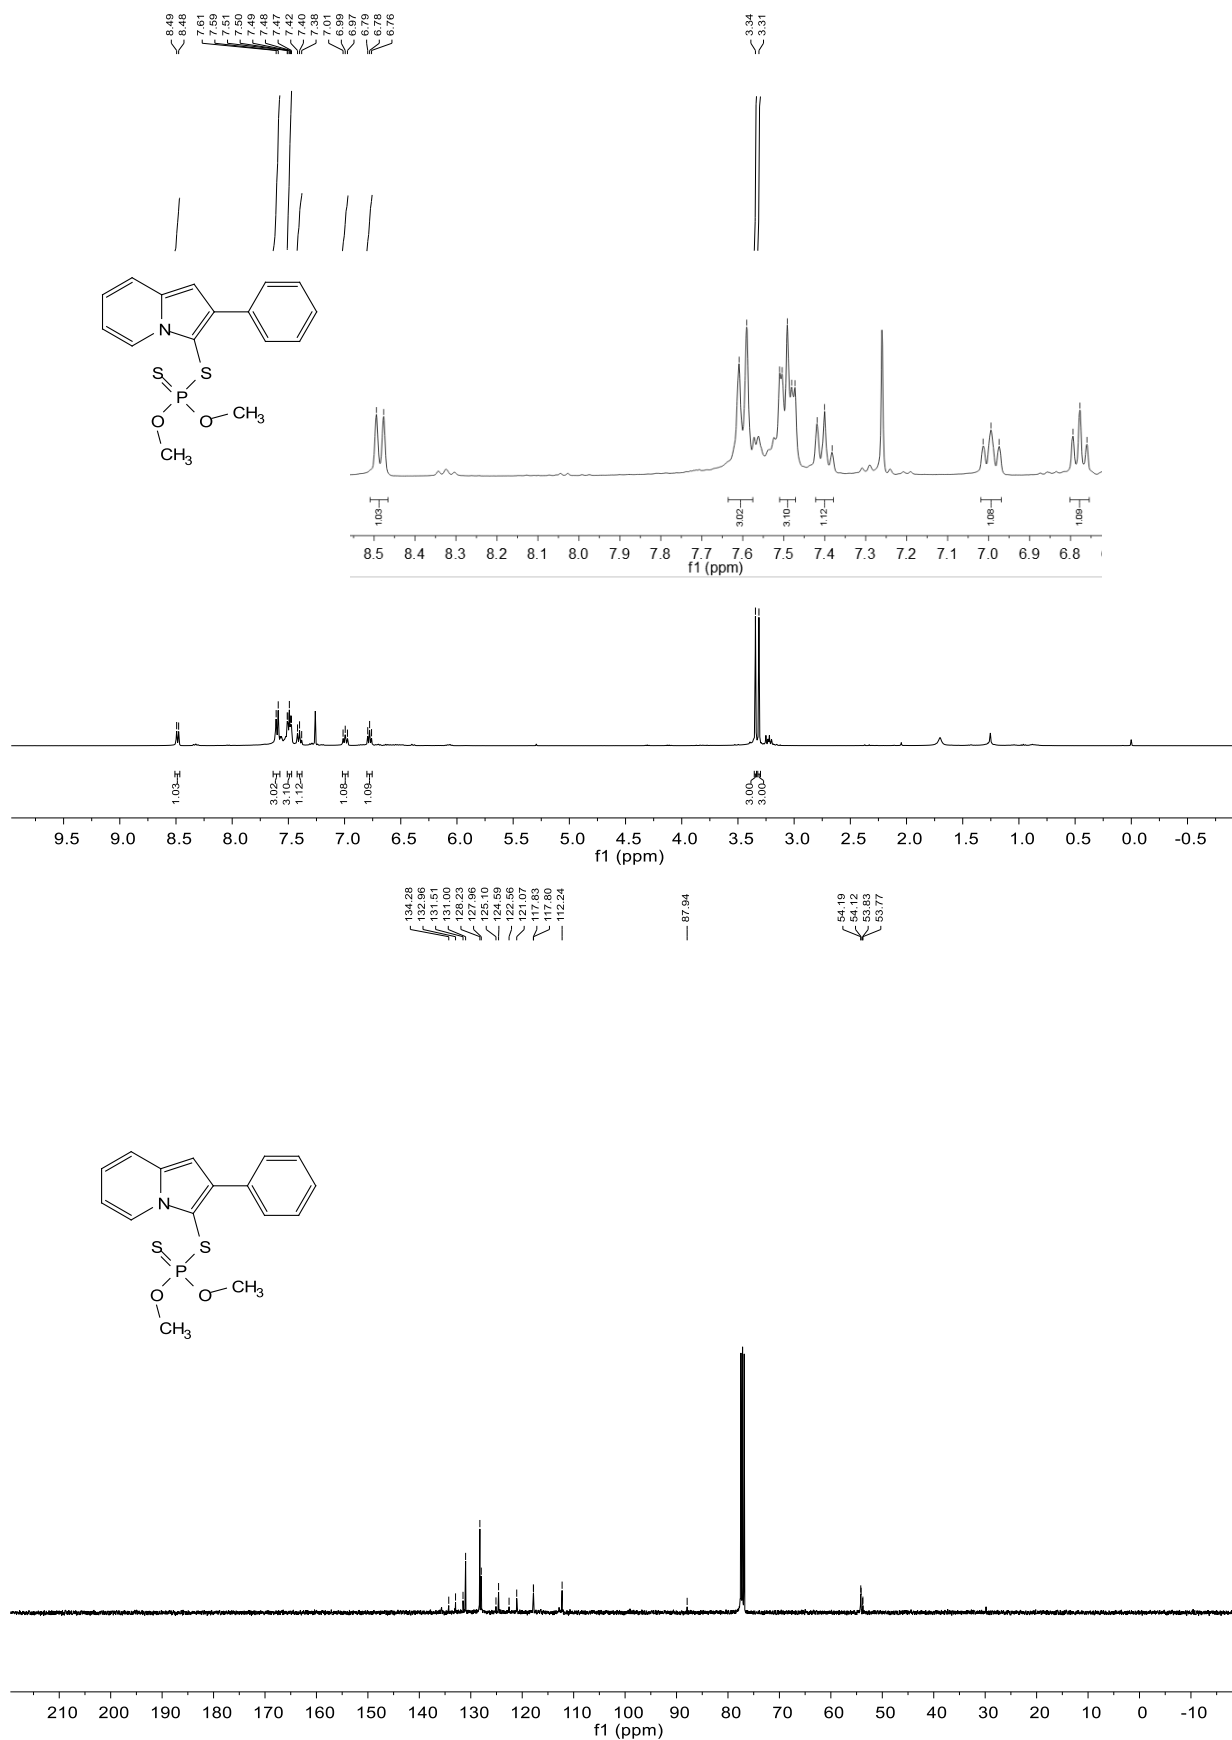

22.836  
22.760  
22.605  
22.528

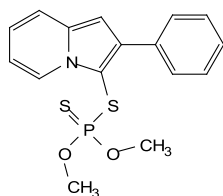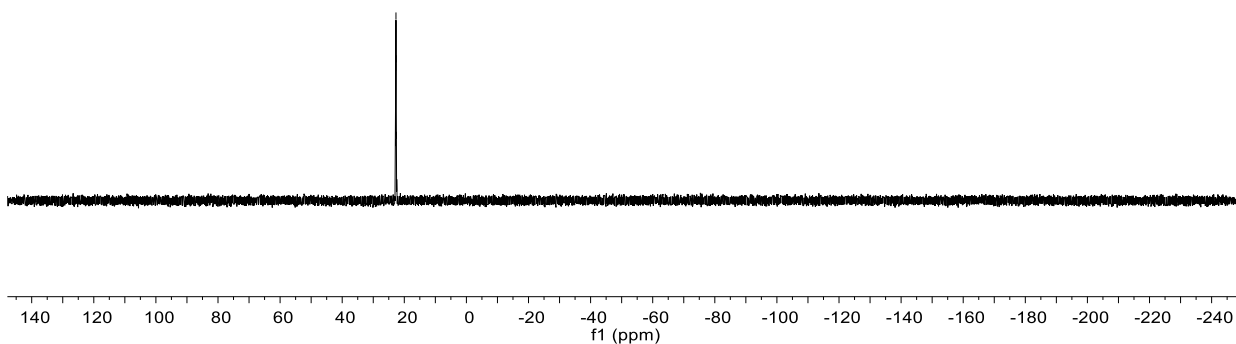

$^1\text{H}$  NMR (400 MHz,  $\text{CDCl}_3$ ),  $^{13}\text{C}$  NMR (100 MHz,  $\text{CDCl}_3$ ) and  $^{31}\text{P}$  NMR (162 MHz,  $\text{CDCl}_3$ ) spectrum of compound **5b**

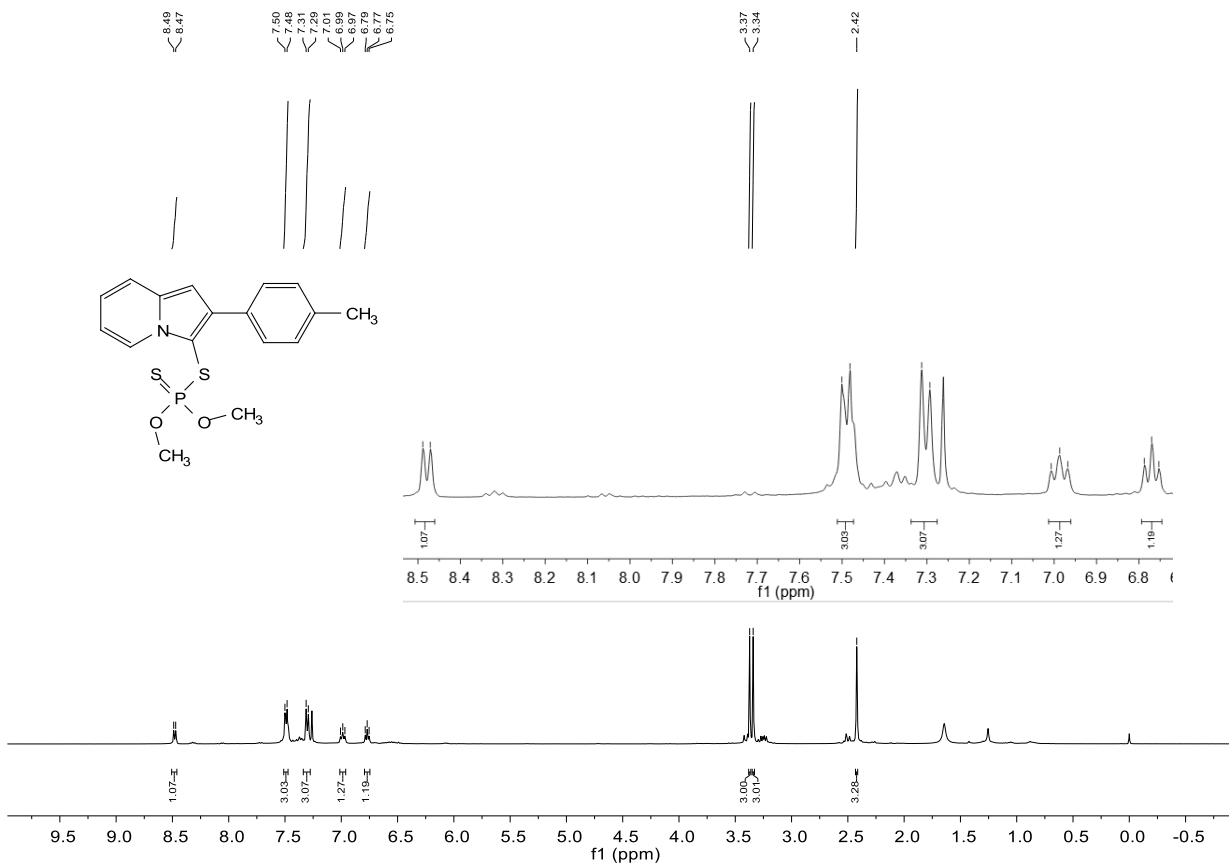



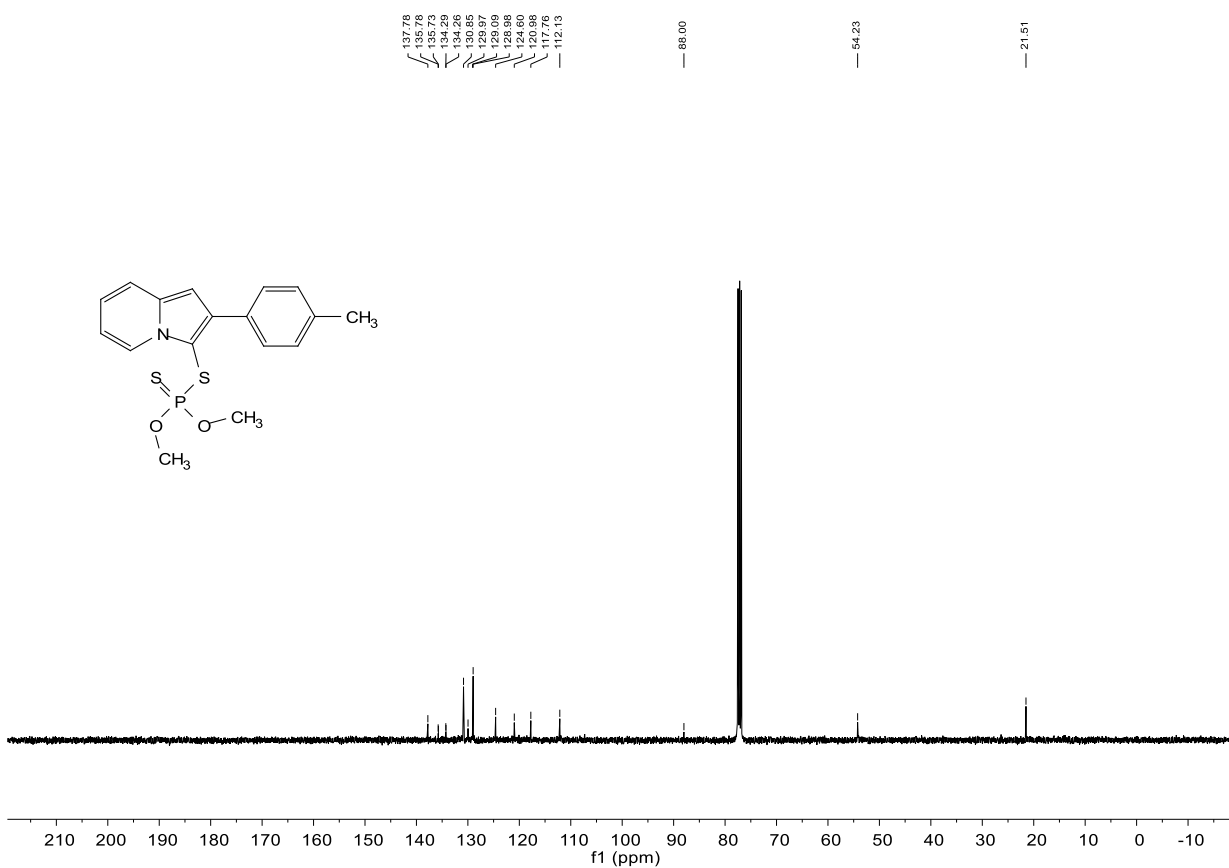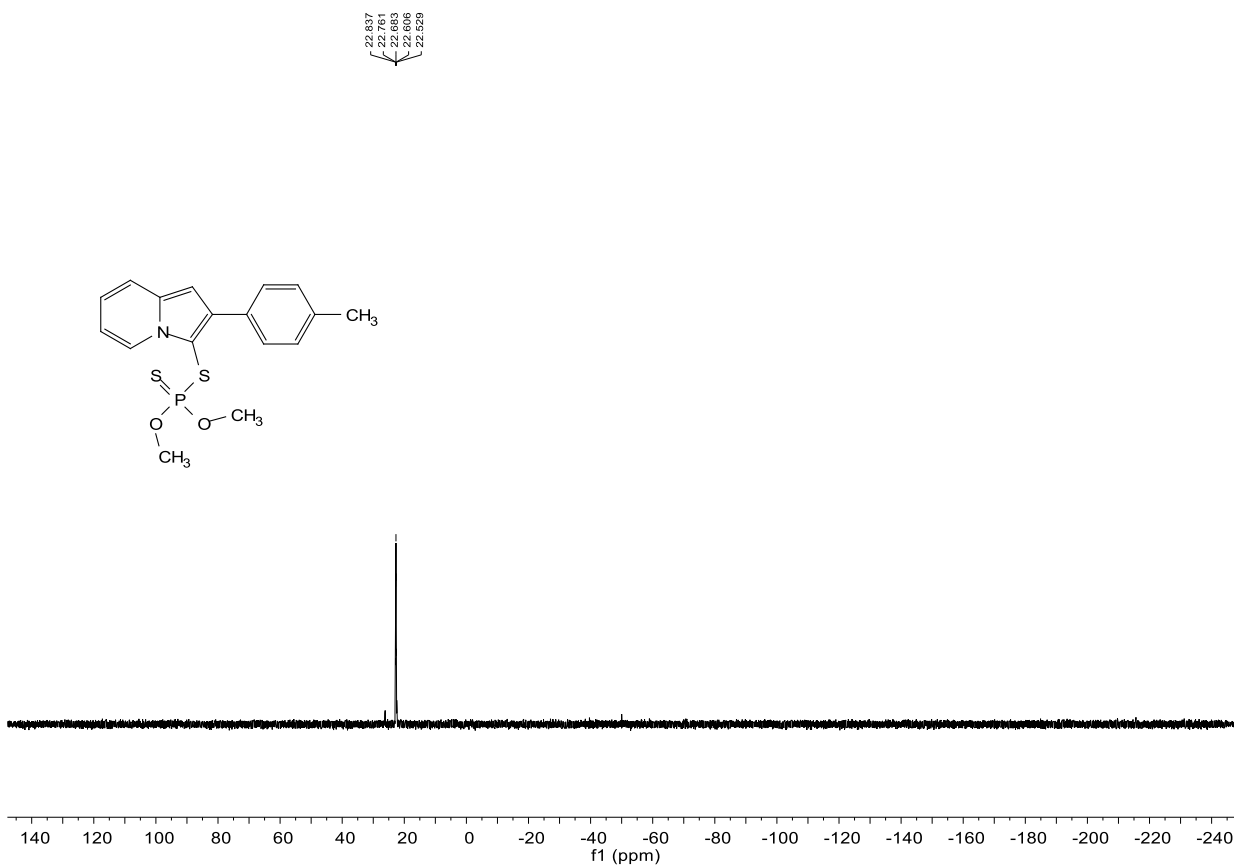

<sup>1</sup>H NMR (400 MHz, CDCl<sub>3</sub>), <sup>13</sup>C NMR (100 MHz, CDCl<sub>3</sub>) and <sup>31</sup>P NMR (162 MHz, CDCl<sub>3</sub>)

spectrum of compound **5c**

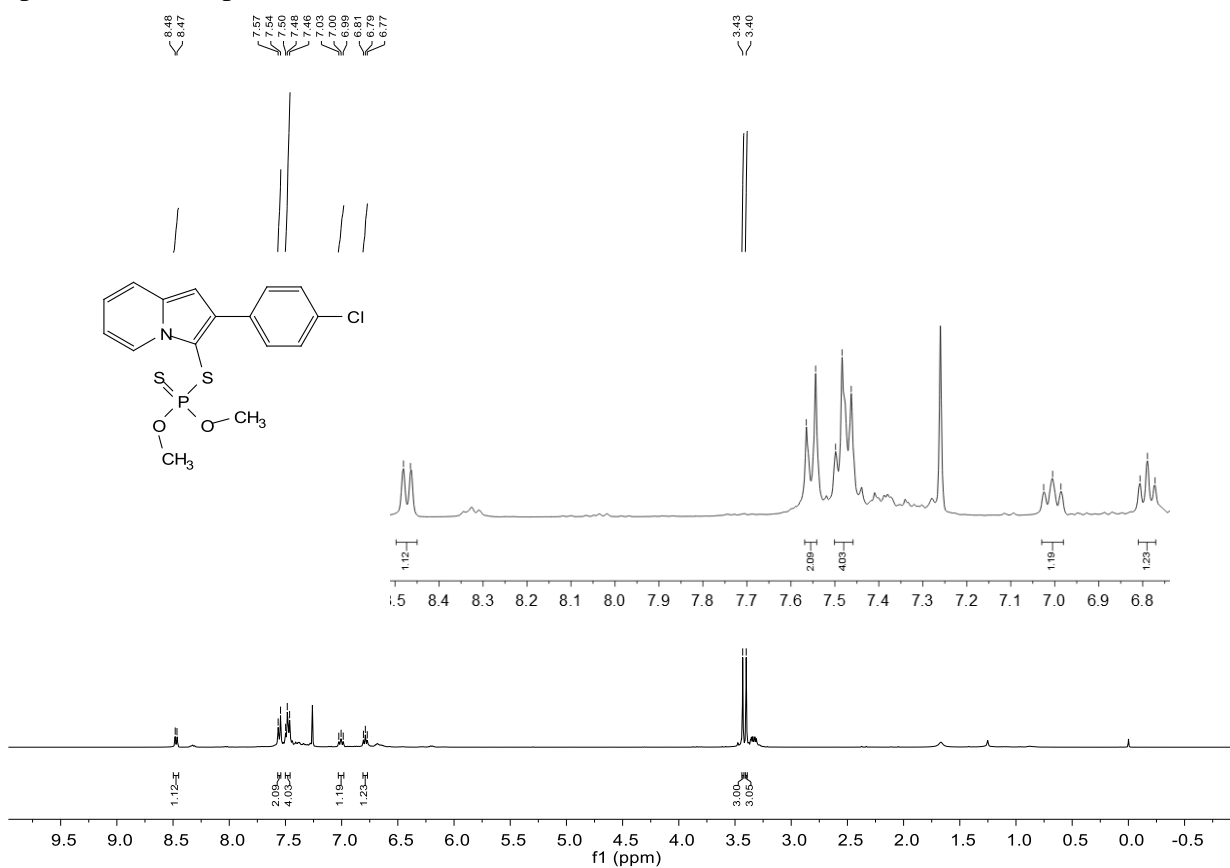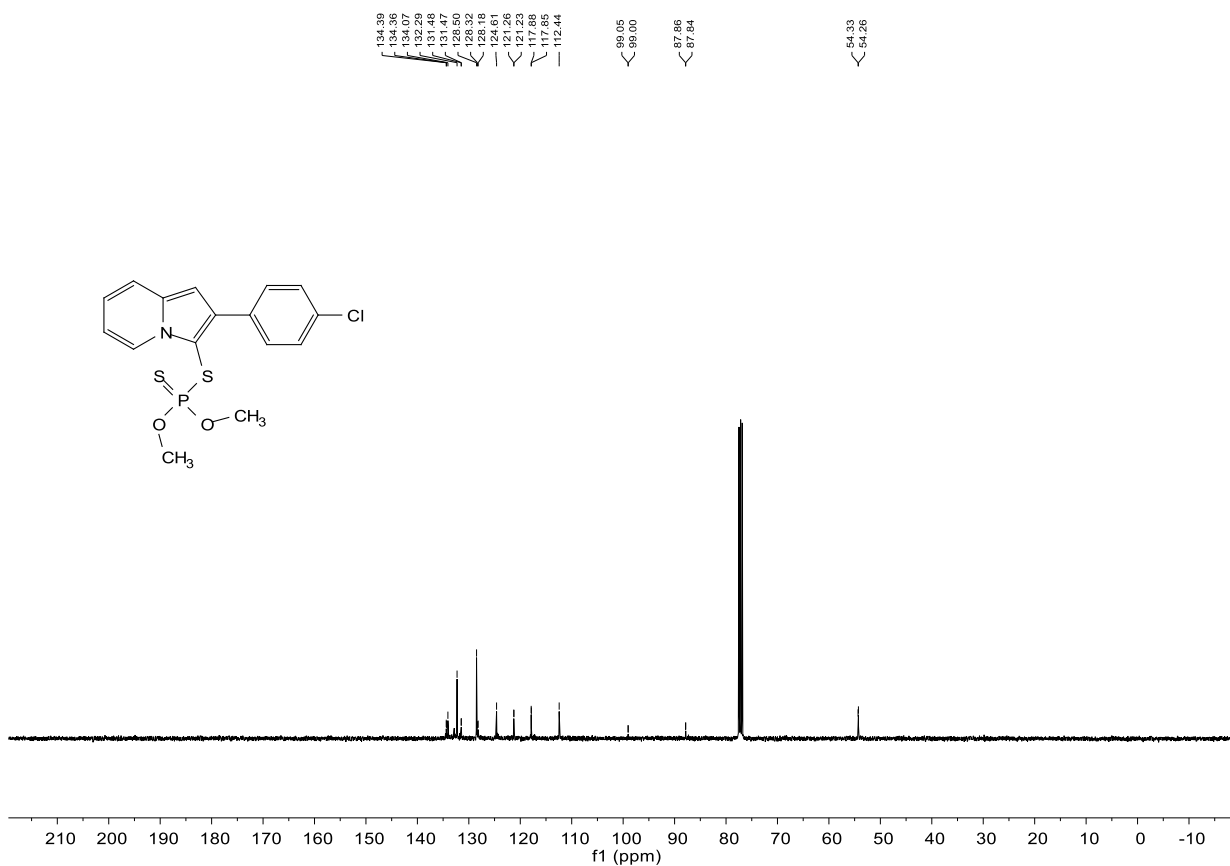

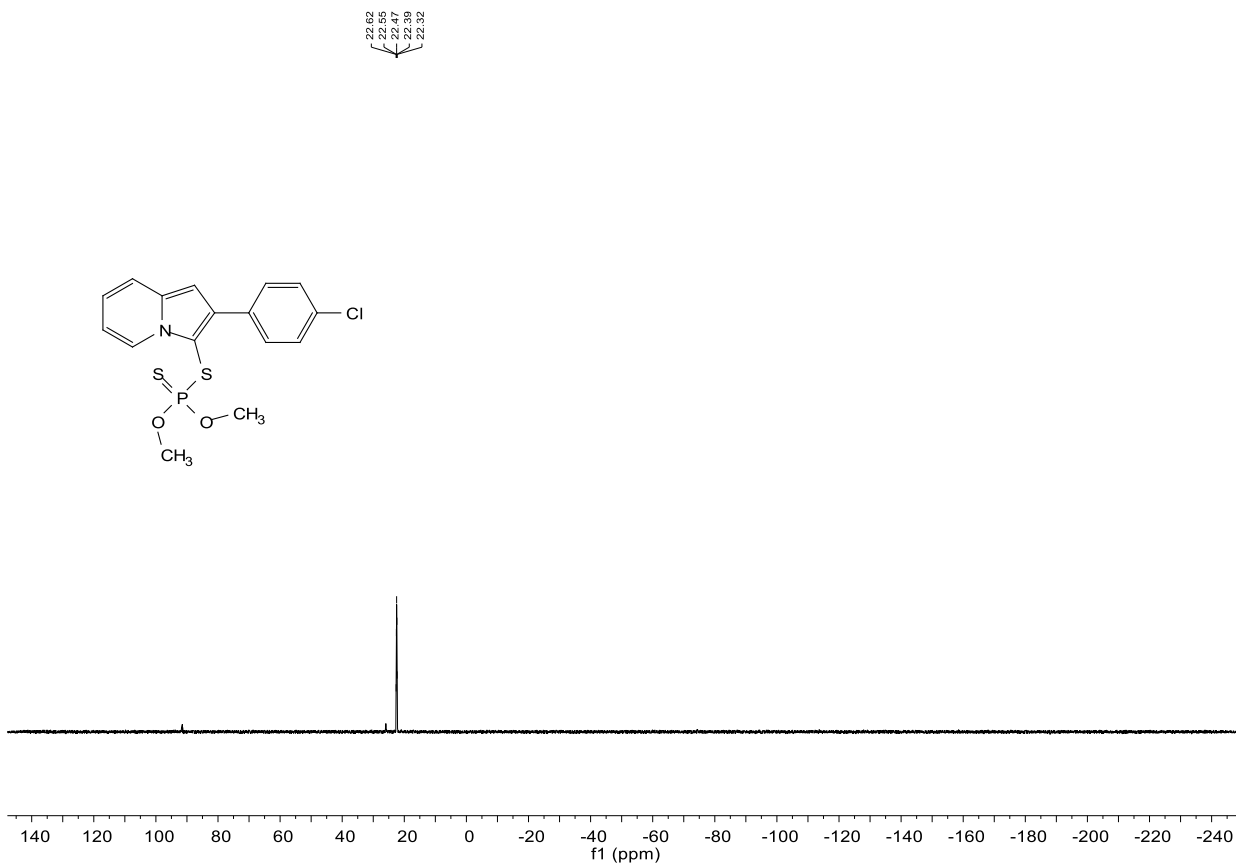

$^1\text{H}$  NMR (400 MHz,  $\text{CDCl}_3$ ),  $^{13}\text{C}$  NMR (100 MHz,  $\text{CDCl}_3$ ) and  $^{31}\text{P}$  NMR (162 MHz,  $\text{CDCl}_3$ ) spectrum of compound **5d**

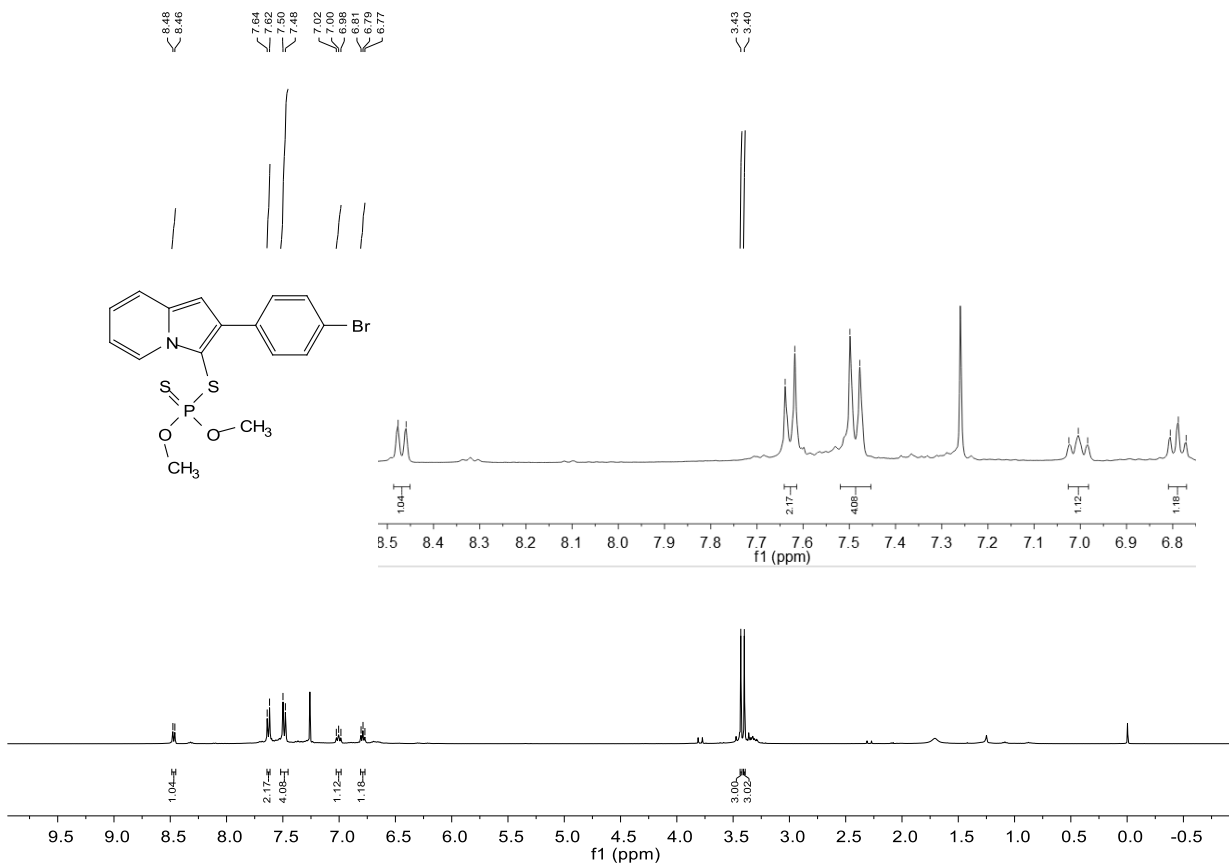

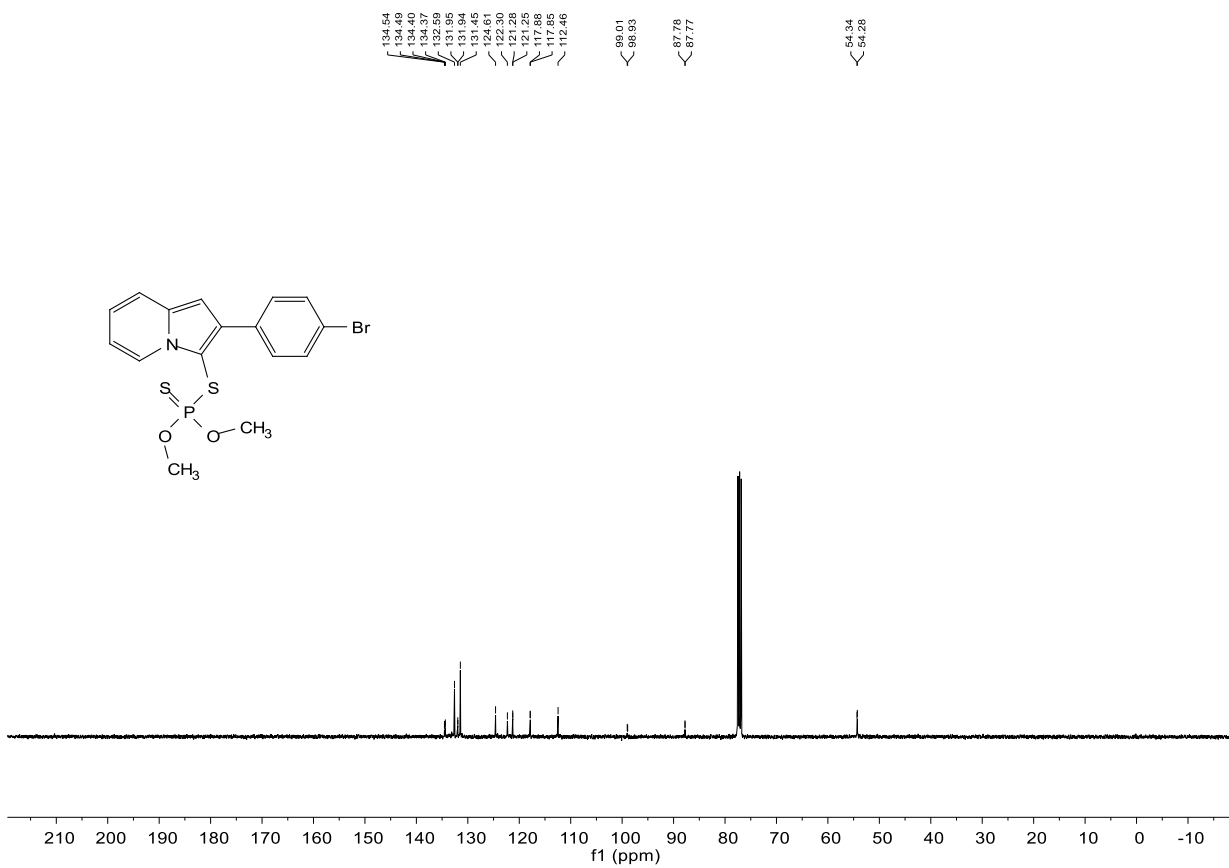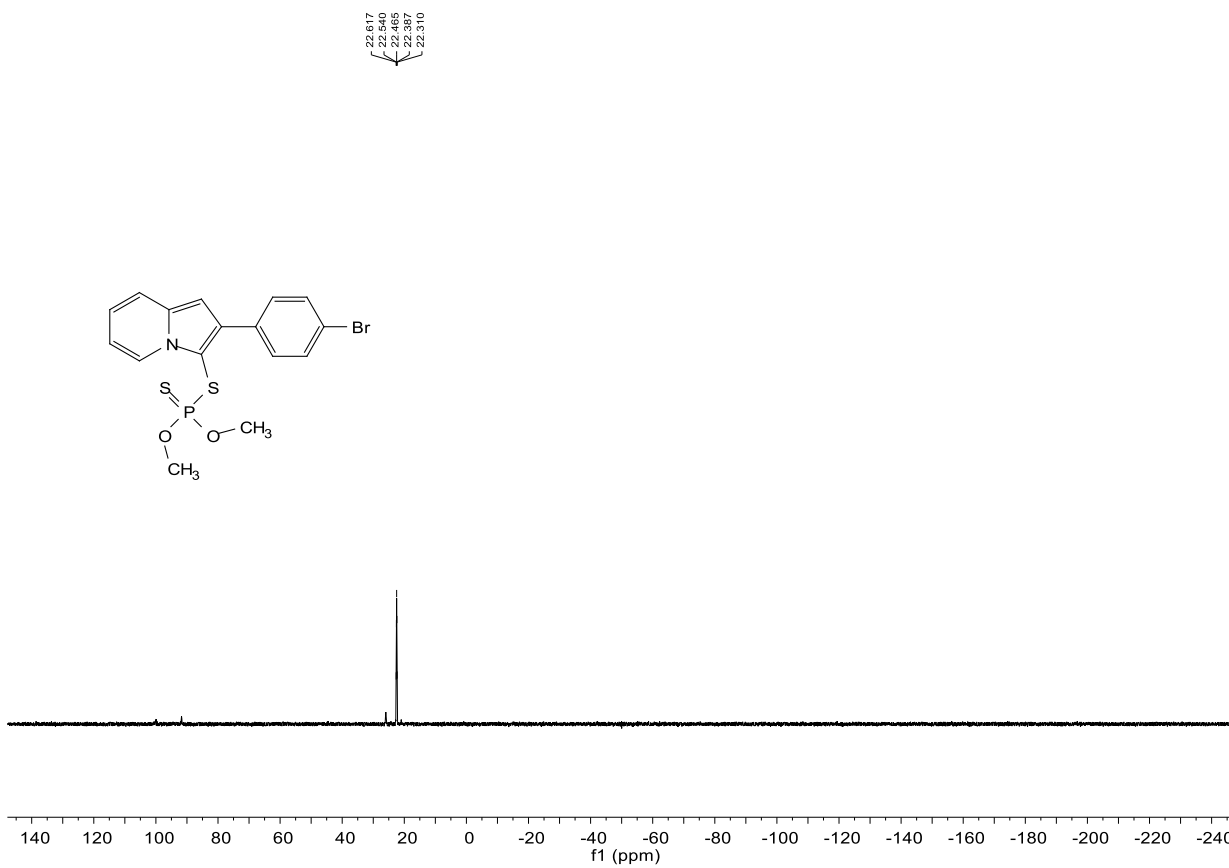

$^1\text{H}$  NMR (400 MHz,  $\text{CDCl}_3$ ),  $^{13}\text{C}$  NMR (100 MHz,  $\text{CDCl}_3$ ) and  $^{31}\text{P}$  NMR (162 MHz,  $\text{CDCl}_3$ ) spectrum of compound **5e**

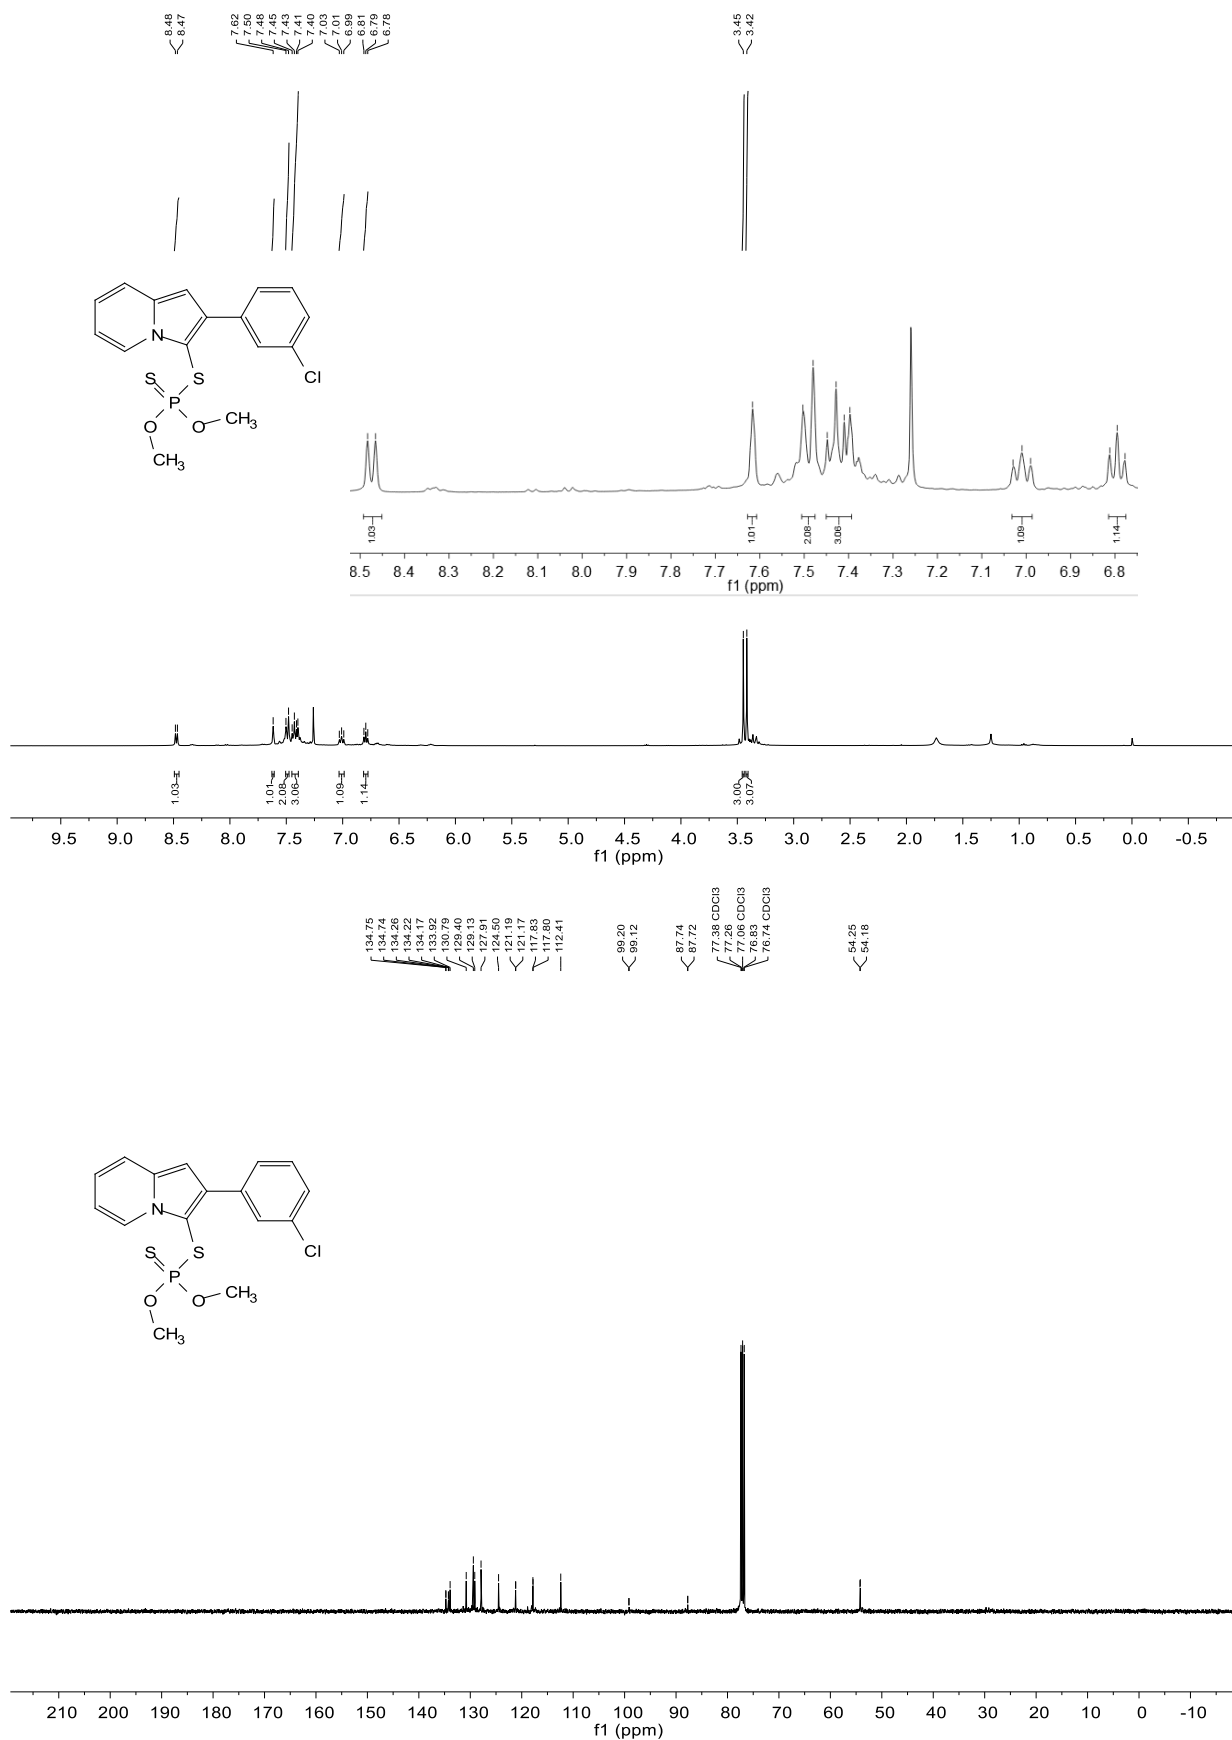

22.642  
22.587  
22.412  
22.335

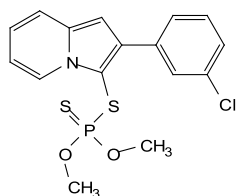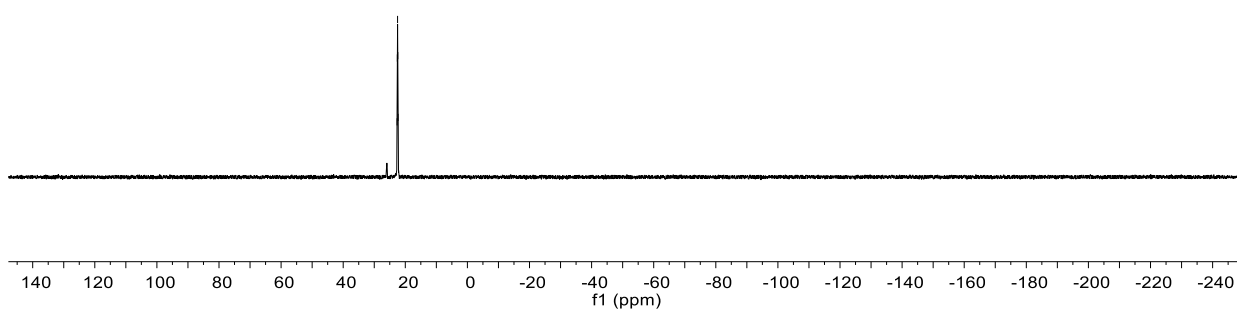

## 4. References

1. (a) L. Teng, X. Liu, P. Guo, Y. Yu and H. Cao, *Org. Lett.*, 2020, **22**, 3841-3845; (b) J. Zhou, X. Shi, H. Zheng, G. Chen, C. Zhang, X. Liu and H. Cao, *Org. Lett.*, 2022, **24**, 3238-3243.
2. W. Kim, H. Y. Kim and K. Oh, *J. Org. Chem.*, 2021, **86**, 15973-15991.
